# Supplementary material
Source: HighWire-hosted journal article supplement (https://gut.bmj.com/content/68/11/1942)
Supplement: inline-supplementary-material-7 [file inline-supplementary-material-7.xlsx]

## Sheet: TableS2
Supplementary Table 2. OTU table of stomach microbiome
OTU	Rank1	Rank2	Rank3	Rank4	Rank5	Rank6	Rank7	CC001	CC001	CC001	CC001	CC001	CC001	CC002	CC002	CC002	CC002	CC002	CC002	CC002	CC019	CC019	CC019	CC019	CC019	CC019	CC036	CC036	CC036	CC036	CC036	CC036	CC036	CC042	CC042	CC042	CC042	CC042	CC061	CC061	CC061	CC061	CC061	CC061
OTU_2	k__Bacteria	p__Firmicutes	c__Bacilli	o__Lactobacillales	f__Lactobacillaceae	g__Lactobacillus	s__	1163	367	159	34	32	72	167	0	45	3	13577	1158	0	38	8540	175	2160	22	47	49	449	352	57	34	278	44	662	9101	4545	4	12373	15084	5551	1739	15	387	1150
OTU_1	k__Bacteria	p__Firmicutes	c__Bacilli	o__Lactobacillales	f__Lactobacillaceae	g__Lactobacillus	s__	13959	9123	3568	3432	4856	6395	4	1	16	0	967	104	0	0	3	22	4	10	7924	6375	489	2385	4223	75	2030	3285	0	14	25	0	6	1	8	1	11	1138	341
OTU_3	k__Bacteria	p__Firmicutes	c__Bacilli	o__Lactobacillales	f__Lactobacillaceae	g__Lactobacillus	s__	9	0	2	1501	3880	6042	0	0	0	1	0	3	0	0	0	2	2	1	0	2905	10681	6341	2467	1641	5257	1599	0	0	0	0	1	0	1	6	1	0	2
OTU_5	k__Bacteria	p__Cyanobacteria	c__Chloroplast	o__Streptophyta	f__	g__	s__	7	1761	9	11	18	9	91	1	30	1	441	7	0	0	4	8	15	3	53	18	162	0	28	6	3	23	6	40	2671	0	356	5	8190	7031	2	182	115
OTU_4	k__Bacteria	p__Firmicutes	c__Bacilli	o__Lactobacillales	f__Lactobacillaceae	g__Lactobacillus	s__reuteri	2	0	2	2273	5109	3997	5	0	0	0	466	13	0	0	7	8	4	1	3271	4992	7980	3448	3220	1039	2199	2064	0	0	6	0	2	0	1	0	1	0	1
OTU_6	k__Bacteria	p__Proteobacteria	c__Alphaproteobacteria	o__Rickettsiales	f__mitochondria	NA	NA	13	191	21	11	1	2	131	0	5	3	360	7	2	1	36	9	37	2	148	13	1320	1	1	66	1	0	9	93	1415	2	408	0	6019	4521	10	1099	669
OTU_7	k__Bacteria	p__Verrucomicrobia	c__Verrucomicrobiae	o__Verrucomicrobiales	f__Verrucomicrobiaceae	g__Akkermansia	s__muciniphila	4	1	0	367	3	0	40	0	0	0	3	19	0	0	0	0	6	0	6	327	25	56	4444	3	104	2894	1	3	22	0	121	23	246	145	0	4	0
OTU_10	k__Bacteria	p__Firmicutes	c__Clostridia	o__Clostridiales	f__	g__	s__	147	1780	3261	1	2	3	1	0	8	0	0	0	0	0	0	628	500	0	290	0	0	0	0	0	1	1	9	468	9	0	2	1	8	0	0	15	1080
OTU_12	k__Bacteria	p__Proteobacteria	c__Gammaproteobacteria	o__Pasteurellales	f__Pasteurellaceae	NA	NA	0	0	0	1	0	7	57	0	15	0	0	4	0	0	11	21	14	1	28	0	1	0	0	0	0	0	0	17	344	0	257	17	1461	2443	0	5	1
OTU_22	k__Bacteria	p__Firmicutes	c__Clostridia	o__Clostridiales	f__	g__	s__	25	263	797	0	10	0	0	0	8	0	0	2	0	2	767	165	1966	0	15	0	0	22	0	0	31	0	61	181	9	0	2	0	1	5	2	3	91
OTU_8	k__Bacteria	p__Bacteroidetes	c__Bacteroidia	o__Bacteroidales	f__Prevotellaceae	g__Prevotella	s__	1	1	0	564	12	1	0	0	0	1	0	0	0	0	0	0	0	0	0	479	233	1229	1584	54	1922	1816	0	0	0	0	0	0	0	0	0	0	0
OTU_11	k__Bacteria	p__Bacteroidetes	c__Bacteroidia	o__Bacteroidales	f__Bacteroidaceae	g__Bacteroides	s__acidifaciens	28	205	69	260	81	14	0	0	0	0	0	0	0	1	57	0	17	1	48	317	1	1854	619	8	1587	464	0	27	38	0	48	8	74	107	0	3	363
OTU_497	k__Bacteria	p__Cyanobacteria	c__Chloroplast	o__Streptophyta	f__	g__	s__	27	47	7	12	5	1	58	0	15	0	188	1	1	1	16	6	14	2	63	21	394	0	0	4	0	1	0	32	735	0	150	1	1628	1563	10	1204	74
OTU_18	k__Bacteria	p__Bacteroidetes	c__Bacteroidia	o__Bacteroidales	f__Rikenellaceae	g__	s__	181	675	1015	0	0	3	36	0	1	0	2	13	0	0	218	81	885	1	184	0	0	1	0	0	2	0	37	281	32	0	25	14	74	32	2	5	1599
OTU_17	k__Bacteria	p__Bacteroidetes	c__Bacteroidia	o__Bacteroidales	f__[Odoribacteraceae]	g__Odoribacter	s__	0	0	0	0	0	1	11	0	1	1	1	1	0	1	269	396	1546	3	0	1	0	0	0	0	0	0	147	1159	22	0	7	0	3	0	3	2	13
OTU_27	k__Bacteria	p__Firmicutes	c__Clostridia	o__Clostridiales	f__Lachnospiraceae	g__	s__	0	0	0	0	0	0	2	0	0	0	0	1	0	9	1444	14	350	1	25	0	0	0	0	0	1	0	29	160	6	0	2	0	2	0	0	0	3
OTU_16	k__Bacteria	p__Bacteroidetes	c__Bacteroidia	o__Bacteroidales	f__S24-7	g__	s__	500	1354	617	8	1	0	38	0	19	0	0	29	0	2	596	163	309	0	51	16	0	54	70	0	44	31	3	246	25	0	19	7	76	77	0	1	66
OTU_21	k__Bacteria	p__Firmicutes	c__Clostridia	o__Clostridiales	f__	g__	s__	0	0	0	10	2	6	26	0	0	0	0	0	0	0	0	0	1	0	10	17	0	120	1330	2	172	969	0	0	0	0	0	3	0	0	0	0	0
OTU_31	k__Bacteria	p__Firmicutes	c__Clostridia	o__Clostridiales	f__Lachnospiraceae	g__	s__	68	335	1257	0	0	0	6	0	0	0	0	0	0	0	0	0	1	0	0	0	0	0	0	0	0	0	0	0	0	0	0	0	0	0	0	3	145
OTU_26	k__Bacteria	p__Firmicutes	c__Clostridia	o__Clostridiales	f__	g__	s__	23	280	1167	2	1	4	0	0	0	0	0	1	0	1	15	34	236	0	23	1	0	12	4	1	15	11	33	52	8	0	2	2	30	7	0	0	51
OTU_711	k__Bacteria	p__Firmicutes	c__Clostridia	o__Clostridiales	f__	g__	s__	0	18	0	36	9	0	0	0	0	0	0	0	0	0	166	244	1135	1	38	33	0	1	6	0	2	2	29	83	5	0	1	0	3	0	1	0	7
OTU_13	k__Bacteria	p__Bacteroidetes	c__Bacteroidia	o__Bacteroidales	f__S24-7	g__	s__	249	883	293	145	15	14	39	0	61	0	0	7	0	5	1125	50	440	0	120	125	8	340	325	2	283	227	4	107	71	0	6	3	14	10	1	3	474
OTU_460	k__Bacteria	p__Firmicutes	c__Clostridia	o__Clostridiales	f__	g__	s__	0	0	0	17	200	4	0	0	0	1	0	0	0	0	0	0	0	0	0	16	0	0	1115	0	10	1005	0	0	0	0	0	0	0	0	0	0	0
OTU_23	k__Bacteria	p__Firmicutes	c__Clostridia	o__Clostridiales	f__Ruminococcaceae	g__	s__	61	566	1107	1	24	5	12	0	0	0	0	0	0	0	3	47	89	0	16	0	0	9	35	1	21	30	2	58	14	0	20	1	30	27	0	9	300
OTU_25	k__Bacteria	p__Firmicutes	c__Clostridia	o__Clostridiales	f__	g__	s__	88	396	1092	0	19	2	7	0	0	0	1	1	0	0	22	15	88	1	30	0	0	1	0	0	0	1	5	37	7	1	3	1	8	3	0	4	482
OTU_772	k__Bacteria	p__Firmicutes	c__Clostridia	o__Clostridiales	f__	g__	s__	0	3	1	0	2	0	36	0	0	0	0	0	0	0	333	6	1062	0	7	0	0	0	4	0	0	0	0	5	41	0	4	1	1	0	0	0	3
OTU_9	k__Bacteria	p__Bacteroidetes	c__Bacteroidia	o__Bacteroidales	f__S24-7	g__	s__	264	826	391	184	35	12	9	0	1	0	0	2	0	3	678	192	931	1	140	229	0	280	1036	2	196	616	12	221	28	0	2	0	4	37	1	1	301
OTU_28	k__Bacteria	p__Firmicutes	c__Clostridia	o__Clostridiales	f__	g__	s__	28	403	942	1	18	8	0	0	0	0	1	0	0	0	1	117	201	0	32	0	0	8	139	0	30	128	11	74	5	0	4	0	2	0	2	4	344
OTU_37	k__Bacteria	p__Proteobacteria	c__Deltaproteobacteria	o__Desulfovibrionales	f__Desulfovibrionaceae	g__Desulfovibrio	s__	0	0	0	9	17	0	0	0	0	0	0	0	0	1	892	12	104	0	9	2	8	53	0	0	27	0	6	30	11	0	1	0	0	0	0	0	0
OTU_29	k__Bacteria	p__Firmicutes	c__Clostridia	o__Clostridiales	f__	g__	s__	129	230	889	0	0	0	0	0	0	0	0	0	0	0	1	0	0	0	0	0	0	0	0	0	0	0	0	0	0	0	1	0	7	12	0	1	272
OTU_243	k__Bacteria	p__Proteobacteria	c__Alphaproteobacteria	o__Rickettsiales	f__mitochondria	NA	NA	0	150	1	1	0	0	8	0	0	0	40	0	0	0	0	3	0	0	4	0	15	1	2	0	0	1	0	5	208	0	67	1	819	599	0	14	9
OTU_39	k__Bacteria	p__Firmicutes	c__Clostridia	o__Clostridiales	f__	g__	s__	12	246	800	0	17	0	0	0	0	0	0	0	0	1	0	1	4	0	156	0	0	0	0	0	0	0	0	0	1	0	0	0	1	0	0	2	207
OTU_24	k__Bacteria	p__Firmicutes	c__Clostridia	o__Clostridiales	f__Lachnospiraceae	g__	s__	42	327	669	0	59	0	0	0	0	0	0	1	1	0	1	480	178	1	15	0	0	0	0	0	1	0	12	110	2	0	0	0	1	1	2	5	799
OTU_14	k__Bacteria	p__Bacteroidetes	c__Bacteroidia	o__Bacteroidales	f__S24-7	g__	s__	143	660	275	209	20	77	0	0	0	1	0	0	0	0	0	0	0	0	10	273	58	206	771	0	159	414	0	0	8	0	0	0	0	41	0	5	414
OTU_43	k__Bacteria	p__Firmicutes	c__Clostridia	o__Clostridiales	f__Lachnospiraceae	g__	s__	12	192	679	0	2	1	0	0	0	0	0	0	0	0	0	0	0	0	5	0	0	1	0	0	5	0	0	0	0	0	0	0	0	0	0	0	30
OTU_19	k__Bacteria	p__Proteobacteria	c__Betaproteobacteria	o__Burkholderiales	f__Alcaligenaceae	g__Sutterella	s__	6	60	13	103	90	2	0	0	0	0	0	0	0	0	0	0	0	0	0	140	168	575	662	4	516	367	0	0	11	0	0	0	5	7	0	1	30
OTU_20	k__Bacteria	p__Firmicutes	c__Clostridia	o__Clostridiales	f__Lachnospiraceae	g__	s__	19	11	108	628	11	9	2	0	0	0	0	0	0	0	82	4	122	2	29	656	5	42	630	1	83	380	2	84	14	0	0	0	0	0	1	0	21
OTU_34	k__Bacteria	p__Bacteroidetes	c__Bacteroidia	o__Bacteroidales	f__Porphyromonadaceae	g__Parabacteroides	s__distasonis	0	0	0	198	6	0	0	0	0	0	0	0	0	0	0	0	0	0	0	181	96	236	649	11	244	553	0	0	3	0	0	0	0	0	0	0	0
OTU_32	k__Bacteria	p__Firmicutes	c__Clostridia	o__Clostridiales	f__	g__	s__	0	0	0	12	34	0	0	0	0	0	0	0	0	0	0	0	0	0	80	19	0	121	619	1	110	437	0	0	0	0	0	0	31	3	0	0	0
OTU_15	k__Bacteria	p__Bacteroidetes	c__Bacteroidia	o__Bacteroidales	f__S24-7	g__	s__	302	551	220	134	2	0	0	0	0	0	0	0	0	8	610	0	234	0	83	172	4	220	90	1	238	69	3	160	13	0	0	3	2	3	0	3	466
OTU_64	k__Bacteria	p__Firmicutes	c__Clostridia	o__Clostridiales	f__Ruminococcaceae	g__Ruminococcus	s__	0	0	0	0	0	0	0	0	0	0	0	0	0	0	53	0	585	0	0	0	0	0	0	0	0	0	0	0	0	0	0	0	0	0	0	0	0
OTU_30	k__Bacteria	p__Bacteroidetes	c__Bacteroidia	o__Bacteroidales	f__Porphyromonadaceae	g__Parabacteroides	s__	27	106	71	77	1	0	0	0	0	0	0	0	0	0	39	0	12	1	6	95	2	13	583	0	15	368	0	15	2	0	1	0	0	0	0	0	73
OTU_38	k__Bacteria	p__Firmicutes	c__Clostridia	o__Clostridiales	f__	g__	s__	20	126	546	13	11	1	0	0	0	0	0	0	1	0	33	27	71	0	8	10	1	4	102	0	7	77	1	7	4	0	7	2	4	10	1	1	120
OTU_41	k__Bacteria	p__Firmicutes	c__Clostridia	o__Clostridiales	f__	g__	s__	47	267	539	0	0	0	0	0	0	0	0	0	0	4	186	0	178	0	10	0	0	4	0	0	0	0	7	0	4	1	2	0	7	5	0	0	165
OTU_47	k__Bacteria	p__Firmicutes	c__Clostridia	o__Clostridiales	f__	g__	s__	11	403	531	0	0	2	0	0	0	0	0	0	0	0	3	19	30	1	9	0	0	0	1	0	0	0	5	107	0	0	0	2	7	0	0	5	125
OTU_54	k__Bacteria	p__Bacteroidetes	c__Bacteroidia	o__Bacteroidales	f__S24-7	g__	s__	88	151	90	26	0	0	5	0	0	0	0	0	0	0	0	0	0	0	39	13	0	4	4	0	5	5	0	0	5	0	0	0	0	0	0	2	530
OTU_48	k__Bacteria	p__Cyanobacteria	c__4C0d-2	o__YS2	f__	g__	s__	0	0	0	0	0	0	8	0	0	0	0	0	0	0	0	0	0	0	0	0	0	374	0	0	479	0	0	0	0	0	0	0	0	0	0	0	0
OTU_40	k__Bacteria	p__Deferribacteres	c__Deferribacteres	o__Deferribacterales	f__Deferribacteraceae	g__Mucispirillum	s__schaedleri	51	148	444	0	30	0	5	0	0	0	0	0	0	0	0	1	0	0	51	0	0	14	26	1	33	26	0	0	15	0	1	0	0	0	0	1	233
OTU_46	k__Bacteria	p__Firmicutes	c__Clostridia	o__Clostridiales	f__Ruminococcaceae	g__	s__	16	82	426	0	27	1	0	0	0	0	0	0	0	0	0	16	53	0	11	0	0	19	5	0	24	1	2	36	7	0	14	4	19	7	0	0	219
OTU_52	k__Bacteria	p__Bacteroidetes	c__Bacteroidia	o__Bacteroidales	f__S24-7	g__	s__	70	144	114	11	0	0	0	0	0	0	0	0	0	1	423	8	29	1	1	5	5	12	5	0	9	1	1	53	4	0	0	0	0	0	0	1	72
OTU_45	k__Bacteria	p__Bacteroidetes	c__Bacteroidia	o__Bacteroidales	f__Bacteroidaceae	g__Bacteroides	s__	0	0	0	0	6	0	11	0	0	0	0	0	0	0	4	1	0	0	117	0	54	405	0	1	320	1	0	2	24	0	0	0	0	0	0	0	0
OTU_53	k__Bacteria	p__Firmicutes	c__Clostridia	o__Clostridiales	f__Lachnospiraceae	g__	s__	0	0	0	0	0	0	6	0	0	0	0	0	0	1	41	30	284	0	38	0	0	0	0	0	0	0	5	391	7	0	4	1	1	0	0	0	2
OTU_84	k__Bacteria	p__Firmicutes	c__Clostridia	o__Clostridiales	f__Lachnospiraceae	g__[Ruminococcus]	s__gnavus	32	89	240	11	1	3	0	0	0	0	0	0	0	3	114	12	154	1	13	12	2	24	366	1	40	254	12	59	3	0	1	0	2	3	0	2	91
OTU_35	k__Bacteria	p__Bacteroidetes	c__Bacteroidia	o__Bacteroidales	f__S24-7	g__	s__	0	0	0	94	6	0	0	0	0	0	0	0	0	1	161	2	85	0	35	130	5	57	355	0	76	211	0	10	43	0	0	0	1	0	0	0	0
OTU_36	k__Bacteria	p__Firmicutes	c__Clostridia	o__Clostridiales	f__Lachnospiraceae	g__Dorea	s__	0	0	0	110	1	0	0	0	0	0	0	0	0	0	0	0	0	0	0	127	105	150	261	14	354	183	0	0	0	0	0	0	0	0	0	0	0
OTU_59	k__Bacteria	p__Bacteroidetes	c__Bacteroidia	o__Bacteroidales	f__S24-7	g__	s__	23	47	34	0	0	0	0	0	0	0	0	0	0	5	351	26	43	1	13	0	0	3	0	0	4	0	2	24	0	0	0	0	0	0	0	1	69
OTU_93	k__Bacteria	p__Firmicutes	c__Clostridia	o__Clostridiales	f__	g__	s__	12	76	342	38	3	0	7	0	0	0	0	1	0	0	17	119	313	0	29	33	0	3	3	0	1	6	3	138	3	0	0	0	0	9	0	3	59
OTU_62	k__Bacteria	p__Firmicutes	c__Clostridia	o__Clostridiales	f__	g__	s__	0	0	0	0	0	1	1	0	0	0	0	0	0	0	96	22	220	0	11	0	0	0	0	0	0	0	8	325	0	1	0	0	0	0	0	0	1
OTU_44	k__Bacteria	p__Bacteroidetes	c__Bacteroidia	o__Bacteroidales	f__Rikenellaceae	g__	s__	0	4	2	146	6	0	4	0	0	0	0	0	0	0	5	0	0	0	8	157	5	58	323	0	73	214	0	0	0	0	0	2	0	0	0	0	4
OTU_60	k__Bacteria	p__Firmicutes	c__Clostridia	o__Clostridiales	f__	g__	s__	19	68	321	0	0	0	0	0	0	0	0	0	0	0	10	33	53	0	0	0	0	0	0	0	1	0	0	26	0	0	3	0	0	0	0	1	119
OTU_49	k__Bacteria	p__Tenericutes	c__Mollicutes	o__Anaeroplasmatales	f__Anaeroplasmataceae	g__Anaeroplasma	s__	0	0	0	0	0	0	0	0	17	0	0	0	0	0	10	80	313	0	0	0	0	0	0	0	0	0	13	176	10	0	10	1	4	36	1	0	283
OTU_65	k__Bacteria	p__Firmicutes	c__Clostridia	o__Clostridiales	f__Lachnospiraceae	g__	s__	17	15	75	1	0	0	6	0	0	0	0	0	0	0	308	0	182	0	4	4	1	2	33	0	2	16	10	23	0	0	0	0	0	1	0	1	38
OTU_66	k__Bacteria	p__Firmicutes	c__Clostridia	o__Clostridiales	f__	g__	s__	3	0	106	0	0	0	0	0	0	1	0	1	0	0	4	107	301	0	1	0	0	0	0	0	0	0	8	37	0	0	2	0	0	0	0	1	86
OTU_51	k__Bacteria	p__Firmicutes	c__Clostridia	o__Clostridiales	f__	g__	s__	12	298	255	0	18	0	0	0	0	0	0	0	0	0	0	0	0	0	30	0	0	28	0	0	31	0	0	0	0	0	1	0	0	0	0	2	126
OTU_117	k__Bacteria	p__Firmicutes	c__Clostridia	o__Clostridiales	f__	g__	s__	0	1	0	9	0	0	11	0	0	0	0	0	0	0	1	4	0	0	0	15	1	290	0	1	231	0	0	0	0	0	0	0	0	0	0	0	0
OTU_42	k__Bacteria	p__Bacteroidetes	c__Bacteroidia	o__Bacteroidales	f__S24-7	g__	s__	134	289	191	26	0	0	0	0	0	0	0	12	0	0	55	0	59	0	17	16	0	0	7	0	0	1	0	27	7	0	0	0	0	0	0	0	111
OTU_100	k__Bacteria	p__Firmicutes	c__Clostridia	o__Clostridiales	f__	g__	s__	4	119	70	0	30	0	0	0	0	0	0	0	0	0	68	12	51	0	105	0	1	2	0	0	23	0	1	7	4	0	2	0	3	4	1	4	279
OTU_99	k__Bacteria	p__Firmicutes	c__Erysipelotrichi	o__Erysipelotrichales	f__Erysipelotrichaceae	g__Allobaculum	s__	0	0	0	23	5	7	0	0	0	0	0	0	0	0	0	0	0	0	4	24	264	18	0	6	4	0	0	0	6	0	0	3	33	262	0	0	1
OTU_33	k__Bacteria	p__Tenericutes	c__Mollicutes	o__Anaeroplasmatales	f__Anaeroplasmataceae	g__Anaeroplasma	s__	0	0	0	263	5	1	0	0	0	0	0	0	0	0	0	0	0	0	0	252	25	221	163	1	256	157	0	0	0	0	0	0	0	0	0	0	0
OTU_80	k__Bacteria	p__Firmicutes	c__Clostridia	o__Clostridiales	f__Ruminococcaceae	g__Oscillospira	s__	17	50	254	19	14	0	0	0	0	0	0	0	0	0	47	5	258	0	28	12	1	0	17	1	2	14	6	41	0	0	0	0	0	0	0	0	38
OTU_61	k__Bacteria	p__Firmicutes	c__Clostridia	o__Clostridiales	f__	g__	s__	11	45	256	10	0	0	0	0	0	0	0	0	0	0	0	0	0	0	2	8	0	4	5	0	1	5	0	0	0	0	1	0	2	0	1	2	230
OTU_56	k__Bacteria	p__Firmicutes	c__Bacilli	o__Lactobacillales	f__Streptococcaceae	g__Streptococcus	s__	1	10	7	5	3	33	4	0	0	0	250	1	0	0	4	1	43	0	21	3	54	49	13	4	70	3	9	42	17	0	33	2	23	98	0	8	21
OTU_69	k__Bacteria	p__Firmicutes	c__Clostridia	o__Clostridiales	f__Ruminococcaceae	g__	s__	22	134	246	9	9	1	0	0	0	0	0	0	0	0	0	0	0	0	8	1	0	11	17	2	19	20	0	2	0	0	0	1	0	0	0	0	36
OTU_63	k__Bacteria	p__Firmicutes	c__Clostridia	o__Clostridiales	f__	g__	s__	17	44	98	3	3	0	5	0	0	0	0	0	0	1	237	16	91	0	2	12	2	8	0	0	16	0	10	29	0	0	0	1	0	0	0	0	18
OTU_67	k__Bacteria	p__Firmicutes	c__Clostridia	o__Clostridiales	f__Ruminococcaceae	g__	s__	6	118	198	0	0	0	9	0	0	0	0	0	0	0	0	3	0	0	0	0	0	0	0	0	0	0	0	3	0	0	0	0	5	0	0	0	234
OTU_82	k__Bacteria	p__Bacteroidetes	c__Bacteroidia	o__Bacteroidales	f__[Odoribacteraceae]	g__Odoribacter	s__	0	0	0	0	4	0	0	0	0	0	0	0	0	0	20	11	231	0	0	0	3	25	0	0	32	0	23	94	0	0	0	0	0	0	0	0	0
OTU_83	k__Bacteria	p__Firmicutes	c__Clostridia	o__Clostridiales	f__Ruminococcaceae	g__	s__	4	28	227	0	0	0	0	0	0	0	0	0	0	0	0	0	0	0	20	0	0	0	0	0	0	0	0	0	0	0	0	1	2	5	0	0	131
OTU_75	k__Bacteria	p__Firmicutes	c__Clostridia	o__Clostridiales	f__	g__	s__	7	111	225	0	7	0	0	0	0	0	0	0	0	0	0	17	47	0	19	0	1	9	0	1	13	0	2	14	0	0	2	0	5	1	1	0	35
OTU_50	k__Bacteria	p__Firmicutes	c__Clostridia	o__Clostridiales	f__Ruminococcaceae	g__Oscillospira	s__	32	87	215	55	20	1	1	0	0	0	0	1	0	2	9	59	223	0	30	58	13	43	61	0	84	36	22	94	10	0	5	0	29	3	2	11	203
OTU_74	k__Bacteria	p__Firmicutes	c__Clostridia	o__Clostridiales	f__Lachnospiraceae	g__	s__	47	115	219	0	1	2	0	0	0	0	0	0	0	0	0	0	0	0	0	0	0	12	0	0	12	0	0	0	0	0	0	0	0	3	0	0	109
OTU_70	k__Bacteria	p__Bacteroidetes	c__Bacteroidia	o__Bacteroidales	f__S24-7	g__	s__	23	36	31	14	22	1	0	0	0	0	0	0	0	0	37	0	8	0	4	6	0	164	2	0	213	1	0	4	1	0	0	0	0	0	0	0	47
OTU_58	k__Bacteria	p__Firmicutes	c__Clostridia	o__Clostridiales	f__Dehalobacteriaceae	g__Dehalobacterium	s__	9	67	138	1	7	1	0	0	0	0	0	0	0	0	53	2	30	0	7	2	0	10	50	0	16	72	0	12	1	1	1	0	0	0	0	1	211
OTU_72	k__Bacteria	p__Firmicutes	c__Clostridia	o__Clostridiales	f__Ruminococcaceae	g__	s__	1	42	103	0	14	2	0	0	0	0	0	0	0	0	15	52	178	0	20	0	3	12	179	1	19	205	2	74	3	0	1	0	0	0	0	0	33
OTU_57	k__Bacteria	p__Bacteroidetes	c__Bacteroidia	o__Bacteroidales	f__S24-7	g__	s__	7	24	20	57	5	1	0	0	0	0	0	0	0	0	0	0	0	0	1	51	2	176	201	0	99	102	0	0	3	0	0	0	0	0	0	0	70
OTU_134	k__Bacteria	p__Firmicutes	c__Clostridia	o__Clostridiales	f__Lachnospiraceae	g__Coprococcus	s__	5	50	196	0	1	0	0	0	0	0	0	2	0	0	14	18	37	0	12	0	0	0	6	0	1	16	8	27	2	0	0	0	0	0	0	0	18
OTU_89	k__Bacteria	p__Firmicutes	c__Clostridia	o__Clostridiales	f__Lachnospiraceae	g__	s__	2	12	45	3	36	0	0	0	0	0	0	0	0	0	12	43	192	0	0	3	3	23	0	0	21	1	7	41	0	0	2	0	0	0	0	0	0
OTU_101	k__Bacteria	p__Firmicutes	c__Clostridia	o__Clostridiales	f__Lachnospiraceae	g__	s__	0	0	0	0	15	0	0	0	0	0	0	0	0	0	0	0	0	0	0	1	0	0	188	0	2	124	0	0	0	0	0	0	0	0	0	0	0
OTU_55	k__Bacteria	p__Bacteroidetes	c__Bacteroidia	o__Bacteroidales	f__S24-7	g__	s__	35	58	32	25	4	0	0	0	0	0	0	0	0	0	107	0	15	0	7	28	1	94	186	0	51	79	1	6	0	0	0	0	0	0	0	0	32
OTU_151	k__Bacteria	p__Firmicutes	c__Clostridia	o__Clostridiales	f__Lachnospiraceae	g__	s__	8	90	178	1	1	0	0	0	0	0	0	0	0	0	2	5	20	0	8	0	0	3	13	0	3	9	0	13	0	0	0	0	0	1	0	1	42
OTU_73	k__Bacteria	p__Bacteroidetes	c__Bacteroidia	o__Bacteroidales	f__S24-7	g__	s__	8	19	19	20	0	0	0	0	0	0	0	0	0	0	18	2	8	0	0	11	1	150	30	0	177	14	0	4	12	0	0	0	0	0	0	0	24
OTU_71	k__Bacteria	p__Firmicutes	c__Clostridia	o__Clostridiales	f__	g__	s__	8	109	172	2	12	0	0	0	0	0	0	0	0	0	101	10	50	0	17	12	0	4	6	2	4	4	0	5	0	0	0	0	0	0	0	1	146
OTU_104	k__Bacteria	p__Firmicutes	c__Clostridia	o__Clostridiales	f__	g__	s__	0	0	0	0	6	2	0	0	0	0	0	0	0	0	5	141	171	0	0	0	0	0	0	0	0	0	0	0	0	0	0	0	0	0	0	0	0
OTU_121	k__Bacteria	p__Firmicutes	c__Clostridia	o__Clostridiales	f__Ruminococcaceae	g__Ruminococcus	s__	0	0	0	3	0	1	0	0	0	0	0	0	0	0	0	0	0	0	0	2	0	0	171	0	4	89	0	0	0	0	0	0	0	0	0	0	0
OTU_120	k__Bacteria	p__Firmicutes	c__Clostridia	o__Clostridiales	f__Lachnospiraceae	g__	s__	8	38	169	63	8	0	0	0	0	0	0	0	0	0	0	0	0	0	10	52	1	7	21	0	16	8	0	0	2	0	8	0	0	0	0	1	32
OTU_68	k__Bacteria	p__Firmicutes	c__Erysipelotrichi	o__Erysipelotrichales	f__Erysipelotrichaceae	g__	s__	1	0	0	96	1	1	0	0	0	0	0	0	0	0	0	0	0	0	2	169	104	124	1	2	63	3	0	0	0	0	0	0	0	0	0	0	0
OTU_135	k__Bacteria	p__Firmicutes	c__Clostridia	o__Clostridiales	f__	g__	s__	15	36	166	12	4	0	0	0	0	0	0	0	0	0	10	17	17	0	1	36	0	16	5	0	25	5	0	6	0	0	0	0	0	0	0	0	20
OTU_94	k__Bacteria	p__Firmicutes	c__Clostridia	o__Clostridiales	f__	g__	s__	1	15	50	3	1	0	0	0	0	0	0	0	0	0	9	68	166	0	0	2	0	6	0	0	11	0	1	7	2	0	0	0	0	0	0	0	28
OTU_122	k__Bacteria	p__Firmicutes	c__Clostridia	o__Clostridiales	f__	g__	s__	12	6	28	0	0	0	0	0	0	0	0	0	0	2	49	30	162	1	4	0	0	18	0	0	26	0	23	116	1	0	1	0	0	0	1	1	48
OTU_87	k__Bacteria	p__Firmicutes	c__Clostridia	o__Clostridiales	f__	g__	s__	50	35	161	25	1	2	0	0	0	0	0	0	0	0	93	0	36	0	0	19	0	15	53	0	26	51	1	33	0	0	0	0	6	7	0	1	128
OTU_92	k__Bacteria	p__Firmicutes	c__Clostridia	o__Clostridiales	f__Ruminococcaceae	g__Oscillospira	s__	8	103	161	4	3	0	5	0	0	0	0	0	0	0	2	0	9	0	18	5	0	12	24	0	18	14	2	3	0	0	5	0	10	5	0	1	14
OTU_106	k__Bacteria	p__Firmicutes	c__Clostridia	o__Clostridiales	f__	g__	s__	0	0	0	5	10	0	0	0	0	0	0	15	0	0	0	0	0	0	24	3	0	11	156	1	25	117	0	0	0	0	0	0	4	0	0	0	0
OTU_105	k__Bacteria	p__Tenericutes	c__Mollicutes	o__Mycoplasmatales	f__Mycoplasmataceae	g__Mycoplasma	s__	0	0	0	0	0	13	149	0	54	0	0	13	0	0	6	83	20	0	61	0	0	0	0	0	2	1	0	21	153	0	15	9	11	34	0	14	3
OTU_88	k__Bacteria	p__Firmicutes	c__Clostridia	o__Clostridiales	f__Ruminococcaceae	g__Ruminococcus	s__	18	74	153	0	0	0	0	0	0	0	0	0	0	0	0	0	0	0	9	0	0	0	0	0	0	0	0	0	6	0	1	0	0	0	0	0	123
OTU_114	k__Bacteria	p__Firmicutes	c__Clostridia	o__Clostridiales	f__	g__	s__	3	39	42	3	5	0	0	0	0	0	0	0	0	0	41	2	62	0	10	0	0	1	0	0	0	0	1	27	6	0	0	1	1	0	0	0	151
OTU_118	k__Bacteria	p__Firmicutes	c__Clostridia	o__Clostridiales	f__	g__	s__	0	0	0	0	0	0	0	0	0	0	0	0	0	1	102	26	151	0	0	0	0	0	0	0	0	0	1	2	0	0	0	0	0	0	0	0	0
OTU_621	k__Bacteria	p__Firmicutes	c__Clostridia	o__Clostridiales	f__Lachnospiraceae	g__	s__	18	52	151	0	0	0	2	0	0	0	0	0	0	0	0	0	0	0	0	0	0	0	0	0	4	0	0	0	0	0	0	0	0	0	0	1	46
OTU_138	k__Bacteria	p__Firmicutes	c__Clostridia	o__Clostridiales	f__Ruminococcaceae	g__Oscillospira	s__	4	52	146	23	11	0	0	0	0	0	0	0	0	1	1	12	58	0	34	14	0	17	10	0	15	12	6	13	1	0	5	1	17	13	0	0	53
OTU_116	k__Bacteria	p__Firmicutes	c__Clostridia	o__Clostridiales	f__Lachnospiraceae	g__	s__	6	43	88	5	3	0	11	0	0	0	0	0	1	0	12	17	143	0	1	1	0	9	41	0	13	34	16	26	0	0	2	0	3	4	0	0	21
OTU_147	k__Bacteria	p__Firmicutes	c__Clostridia	o__Clostridiales	f__	g__	s__	0	0	1	0	0	0	0	0	0	0	0	0	0	0	0	0	0	0	0	0	0	0	0	0	0	0	0	0	10	0	5	0	0	0	1	2	140
OTU_78	k__Bacteria	p__Firmicutes	c__Clostridia	o__Clostridiales	f__Lachnospiraceae	NA	NA	0	4	4	74	1	0	0	0	0	0	0	0	0	0	31	2	25	0	0	80	0	0	139	0	3	120	5	1	0	0	3	0	0	0	0	0	0
OTU_91	k__Bacteria	p__Actinobacteria	c__Actinobacteria	o__Actinomycetales	f__Microbacteriaceae	NA	NA	0	0	0	0	0	10	108	0	135	0	0	43	0	0	18	9	45	0	46	0	0	0	0	0	1	0	2	33	59	0	30	2	15	14	0	6	0
OTU_111	k__Bacteria	p__Bacteroidetes	c__Bacteroidia	o__Bacteroidales	f__Rikenellaceae	g__AF12	s__	0	0	0	45	4	0	0	0	0	0	0	0	0	0	0	0	0	0	0	28	0	46	133	0	61	83	0	0	0	0	0	0	0	0	0	0	1
OTU_77	k__Bacteria	p__Proteobacteria	c__Epsilonproteobacteria	o__Campylobacterales	f__Helicobacteraceae	g__Helicobacter	s__	0	0	0	8	3	0	0	0	0	0	0	0	0	0	0	0	0	0	0	3	1	93	58	1	133	55	0	0	0	0	0	0	96	9	0	0	0
OTU_81	k__Bacteria	p__Bacteroidetes	c__Bacteroidia	o__Bacteroidales	f__Rikenellaceae	g__	s__	8	56	73	22	0	0	0	0	0	0	0	0	0	0	0	0	0	0	6	29	28	15	30	0	8	20	0	0	0	0	0	0	0	0	0	1	133
OTU_107	k__Bacteria	p__Firmicutes	c__Clostridia	o__Clostridiales	f__Lachnospiraceae	g__	s__	5	23	40	0	4	0	0	0	0	0	0	0	0	0	2	2	129	1	3	1	0	0	25	0	1	19	4	35	0	0	0	0	3	0	0	2	35
OTU_707	k__Bacteria	p__Bacteroidetes	c__Bacteroidia	o__Bacteroidales	f__S24-7	g__	s__	0	0	0	0	0	0	0	0	0	0	0	0	0	0	0	0	0	0	0	0	0	128	0	0	101	0	0	0	0	0	0	0	0	0	0	0	0
OTU_719	k__Bacteria	p__Firmicutes	c__Clostridia	o__Clostridiales	f__Ruminococcaceae	g__Oscillospira	s__	12	29	128	19	8	5	0	0	1	0	0	0	0	0	0	13	65	0	7	10	2	46	93	0	63	93	4	34	0	0	0	1	3	1	0	1	93
OTU_726	k__Bacteria	p__Firmicutes	c__Clostridia	o__Clostridiales	f__	g__	s__	0	0	0	0	0	0	0	0	0	0	0	0	0	0	28	0	128	0	1	0	0	0	0	0	0	0	0	2	1	0	3	0	0	0	0	0	0
OTU_112	k__Bacteria	p__Firmicutes	c__Clostridia	o__Clostridiales	f__Lachnospiraceae	g__	s__	4	12	44	0	0	0	0	0	0	0	1	0	0	1	48	1	127	0	1	0	0	4	0	0	5	0	16	19	0	0	1	0	0	0	0	0	18
OTU_696	k__Bacteria	p__Firmicutes	c__Bacilli	o__Lactobacillales	f__Lactobacillaceae	g__Lactobacillus	s__	0	0	0	8	24	22	0	0	0	0	0	0	0	0	0	0	0	0	0	34	126	48	13	2	25	7	0	0	0	0	0	0	0	0	0	0	0
OTU_137	k__Bacteria	p__Firmicutes	c__Clostridia	o__Clostridiales	f__	g__	s__	4	31	125	1	3	0	0	0	0	0	0	0	0	0	1	5	6	0	0	2	0	0	3	0	0	0	0	8	0	0	1	0	2	0	0	1	80
OTU_144	k__Bacteria	p__Proteobacteria	c__Gammaproteobacteria	o__Enterobacteriales	f__Enterobacteriaceae	g__	s__	10	7	21	5	18	10	3	0	2	0	2	2	0	0	20	6	11	0	5	0	0	0	1	1	8	1	0	7	9	0	25	11	125	103	1	8	3
OTU_76	k__Bacteria	p__Firmicutes	c__Bacilli	o__Bacillales	NA	NA	NA	0	0	0	79	13	27	4	0	0	0	3	3	0	0	3	0	10	0	4	106	14	14	125	6	18	47	0	0	0	0	18	0	5	24	0	28	4
OTU_157	k__Bacteria	p__Firmicutes	c__Bacilli	o__Lactobacillales	f__Streptococcaceae	g__Streptococcus	s__	0	0	0	0	0	0	6	0	0	0	0	0	0	0	0	0	0	0	0	0	0	1	0	0	0	0	0	0	10	0	1	0	2	124	0	0	0
OTU_95	k__Bacteria	p__Firmicutes	c__Clostridia	o__Clostridiales	f__Ruminococcaceae	g__Oscillospira	s__	8	50	50	48	8	8	0	0	0	0	0	0	0	1	34	21	109	0	4	24	0	45	15	0	53	10	7	53	2	0	2	0	1	6	0	3	121
OTU_143	k__Bacteria	p__Firmicutes	c__Clostridia	o__Clostridiales	f__Ruminococcaceae	g__Ruminococcus	s__	0	0	0	5	2	3	0	0	0	0	0	0	0	0	1	13	16	0	6	5	0	2	2	0	5	0	0	120	12	0	1	0	8	0	0	0	1
OTU_132	k__Bacteria	p__Firmicutes	c__Clostridia	o__Clostridiales	f__Lachnospiraceae	g__	s__	0	0	0	2	0	0	0	0	0	0	0	0	0	0	118	1	74	0	0	1	0	0	7	0	0	1	5	9	0	0	0	0	9	0	0	0	0
OTU_102	k__Bacteria	p__Proteobacteria	c__Gammaproteobacteria	o__Enterobacteriales	f__Enterobacteriaceae	g__	s__	0	0	0	0	0	5	10	0	7	0	0	9	0	0	48	1	26	0	3	1	0	2	1	0	3	0	0	113	35	0	0	2	16	10	0	4	0
OTU_164	k__Bacteria	p__Bacteroidetes	c__Bacteroidia	o__Bacteroidales	f__Rikenellaceae	g__	s__	0	0	0	0	0	1	0	0	0	0	0	0	0	0	0	0	0	0	0	1	112	0	17	0	1	6	0	0	0	0	0	0	0	10	1	0	0
OTU_103	k__Bacteria	p__Bacteroidetes	c__Bacteroidia	o__Bacteroidales	f__S24-7	g__	s__	20	20	30	12	11	1	0	0	0	0	0	0	0	1	111	0	25	0	0	21	0	0	34	0	0	29	1	22	3	0	0	0	1	0	0	1	5
OTU_139	k__Bacteria	p__Firmicutes	c__Clostridia	o__Clostridiales	f__	g__	s__	6	8	23	0	0	0	0	0	0	0	0	0	0	1	108	0	12	0	0	0	0	0	0	0	0	0	3	3	0	0	0	0	0	0	0	0	22
OTU_124	k__Bacteria	p__Tenericutes	c__Mollicutes	o__RF39	f__	g__	s__	0	0	0	0	0	0	0	0	0	0	0	0	0	0	13	6	1	0	0	0	0	106	0	1	65	0	0	60	0	0	2	0	5	0	0	0	0
OTU_169	k__Bacteria	p__Firmicutes	c__Clostridia	o__Clostridiales	f__Lachnospiraceae	g__Coprococcus	s__	5	29	103	7	14	0	1	0	0	0	0	0	0	0	0	4	3	0	13	7	1	5	34	0	18	33	0	5	1	0	2	0	3	0	0	0	9
OTU_85	k__Bacteria	p__Proteobacteria	c__Deltaproteobacteria	o__Desulfovibrionales	f__Desulfovibrionaceae	g__Bilophila	s__	59	24	38	7	2	1	0	0	0	0	0	0	0	0	0	0	0	0	0	5	0	1	103	0	9	73	0	0	10	0	0	0	0	0	0	2	64
OTU_129	k__Bacteria	p__Firmicutes	c__Clostridia	o__Clostridiales	f__Lachnospiraceae	g__Dorea	s__	7	14	38	2	0	0	0	0	10	0	0	0	0	0	100	8	34	0	0	2	0	0	0	0	0	1	1	24	0	0	0	0	0	0	0	0	12
OTU_110	k__Bacteria	p__Bacteroidetes	c__Bacteroidia	o__Bacteroidales	f__Bacteroidaceae	g__Bacteroides	s__uniformis	3	12	5	21	0	0	0	0	0	0	0	0	0	0	16	0	3	0	0	38	0	0	99	1	2	70	1	2	0	0	0	0	0	0	0	0	11
OTU_866	k__Bacteria	p__Firmicutes	c__Clostridia	o__Clostridiales	f__	g__	s__	3	99	84	1	0	0	0	0	0	0	0	0	0	0	0	0	0	0	23	0	0	0	45	0	1	43	0	0	0	0	1	0	0	0	0	0	4
OTU_128	k__Bacteria	p__Firmicutes	c__Clostridia	o__Clostridiales	f__Ruminococcaceae	g__	s__	4	3	71	0	5	0	0	0	0	0	0	0	0	0	0	0	0	0	8	0	0	6	19	0	7	17	0	0	0	0	0	0	0	0	0	0	98
OTU_632	k__Bacteria	p__Cyanobacteria	c__Chloroplast	o__Streptophyta	f__	g__	s__	3	3	0	1	3	0	10	0	0	1	98	0	0	0	0	0	0	0	6	0	11	0	0	0	0	1	0	7	32	0	6	0	95	72	0	5	3
OTU_119	k__Bacteria	p__Bacteroidetes	c__Bacteroidia	o__Bacteroidales	f__S24-7	g__	s__	36	48	41	6	0	0	0	0	2	0	0	0	0	1	68	0	8	0	9	4	0	5	36	0	8	50	0	8	4	0	0	0	0	0	0	0	96
OTU_97	k__Bacteria	p__Firmicutes	c__Clostridia	o__Clostridiales	f__	g__	s__	0	1	0	83	0	0	0	0	0	0	0	0	0	0	0	12	24	0	12	93	0	0	96	0	1	72	0	0	0	0	0	0	0	0	0	0	0
OTU_140	k__Bacteria	p__Actinobacteria	c__Actinobacteria	o__Actinomycetales	f__Corynebacteriaceae	g__Corynebacterium	s__	0	0	0	2	41	95	1	0	0	0	1	1	0	0	0	0	0	0	0	5	1	2	5	0	2	2	0	0	0	0	0	0	0	3	0	3	2
OTU_624	k__Bacteria	p__Firmicutes	c__Clostridia	o__Clostridiales	f__	g__	s__	0	0	0	0	29	0	0	0	0	0	0	0	0	0	0	0	0	0	1	0	0	1	94	0	3	71	0	0	1	0	0	0	0	0	0	0	0
OTU_113	k__Bacteria	p__Proteobacteria	c__Alphaproteobacteria	o__RF32	f__	g__	s__	9	12	92	27	1	0	0	0	0	0	0	0	0	0	0	0	0	0	0	15	1	2	27	0	0	15	0	0	13	0	0	0	0	0	0	1	38
OTU_123	k__Bacteria	p__Bacteroidetes	c__Bacteroidia	o__Bacteroidales	f__S24-7	g__	s__	0	0	0	17	0	0	0	0	1	0	0	0	0	0	0	0	0	0	0	38	8	29	92	0	23	44	0	0	2	0	1	1	0	0	0	0	0
OTU_98	k__Bacteria	p__Bacteroidetes	c__Bacteroidia	o__Bacteroidales	f__S24-7	g__	s__	45	92	82	0	0	0	0	0	0	0	0	0	0	0	3	8	3	0	1	0	0	0	0	0	0	0	2	14	0	0	0	0	0	0	0	1	92
OTU_126	k__Bacteria	p__Firmicutes	c__Clostridia	o__Clostridiales	f__	g__	s__	5	32	90	2	2	0	0	0	0	0	0	1	0	0	8	1	29	0	37	4	4	10	0	0	8	0	0	10	0	0	3	0	0	0	0	0	9
OTU_150	k__Bacteria	p__Firmicutes	c__Erysipelotrichi	o__Erysipelotrichales	f__Erysipelotrichaceae	g__Allobaculum	s__	0	0	0	0	0	0	0	0	0	0	0	0	0	0	0	0	0	0	0	0	90	29	0	1	24	0	0	0	0	0	0	0	0	0	0	0	0
OTU_759	k__Bacteria	p__Firmicutes	c__Clostridia	o__Clostridiales	f__	g__	s__	7	70	44	0	0	0	1	0	0	0	0	0	0	1	19	0	87	0	17	0	0	0	2	0	0	1	3	30	5	0	1	0	0	0	0	0	14
OTU_86	k__Bacteria	p__Firmicutes	c__Clostridia	o__Clostridiales	f__Ruminococcaceae	g__Oscillospira	s__	2	15	29	27	1	3	0	0	0	0	0	0	0	0	1	0	2	0	10	25	16	56	87	1	65	54	0	3	0	0	0	1	0	0	0	0	19
OTU_125	k__Bacteria	p__Bacteroidetes	c__Bacteroidia	o__Bacteroidales	f__S24-7	g__	s__	0	0	0	61	2	0	0	0	0	0	0	0	0	0	0	0	0	0	4	28	0	15	53	0	11	82	0	0	3	0	0	0	0	1	0	0	0
OTU_136	k__Bacteria	p__Firmicutes	c__Erysipelotrichi	o__Erysipelotrichales	f__Erysipelotrichaceae	g__	s__	0	0	0	7	0	0	0	0	0	0	0	0	0	0	0	0	0	0	27	21	0	0	82	0	0	51	0	0	0	0	0	0	0	0	0	0	0
OTU_166	k__Bacteria	p__Firmicutes	c__Bacilli	o__Lactobacillales	f__Streptococcaceae	g__Lactococcus	s__	0	0	0	0	3	0	4	0	0	0	0	20	0	0	0	0	1	0	0	0	0	0	0	0	1	2	0	0	0	0	20	3	79	53	0	0	0
OTU_204	k__Bacteria	p__Firmicutes	c__Clostridia	o__Clostridiales	f__	g__	s__	0	0	0	0	0	0	24	0	0	0	0	0	0	0	0	0	0	0	79	0	0	0	0	0	0	0	0	0	16	0	1	0	2	0	0	0	0
OTU_90	k__Bacteria	p__Bacteroidetes	c__Bacteroidia	o__Bacteroidales	f__S24-7	g__	s__	32	77	44	10	1	0	0	0	0	0	0	0	0	0	42	12	33	0	6	4	11	37	0	2	78	8	0	7	0	1	0	0	0	0	0	0	59
OTU_108	k__Bacteria	p__Cyanobacteria	c__4C0d-2	o__YS2	f__	g__	s__	0	0	0	1	8	1	0	0	0	0	0	0	0	0	0	0	0	0	0	1	2	43	77	0	74	59	0	0	0	0	0	0	0	0	0	0	0
OTU_197	k__Bacteria	p__Firmicutes	c__Clostridia	o__Clostridiales	f__	g__	s__	2	33	8	4	0	0	0	0	0	0	0	0	0	0	75	0	53	0	4	3	0	48	0	0	40	0	0	1	0	0	0	0	0	2	0	0	21
OTU_131	k__Bacteria	p__Firmicutes	c__Erysipelotrichi	o__Erysipelotrichales	f__Erysipelotrichaceae	g__Coprobacillus	s__	0	0	0	5	6	1	0	0	0	0	0	0	0	0	0	7	0	0	0	8	0	33	73	0	30	39	0	0	0	0	0	0	0	0	0	0	0
OTU_165	k__Bacteria	p__Firmicutes	c__Bacilli	o__Lactobacillales	f__Streptococcaceae	g__Lactococcus	s__garvieae	0	0	0	0	0	0	0	0	0	0	0	0	0	0	0	0	0	0	0	0	0	0	72	0	0	54	0	0	0	0	0	0	0	0	0	0	0
OTU_187	k__Bacteria	p__Firmicutes	c__Clostridia	o__Clostridiales	f__	g__	s__	0	1	0	0	2	0	0	0	0	0	0	0	0	0	0	0	0	0	72	0	0	0	0	0	0	0	0	0	0	0	1	0	5	0	0	0	0
OTU_781	k__Bacteria	p__Firmicutes	c__Clostridia	o__Clostridiales	f__Lachnospiraceae	g__	s__	0	0	0	0	0	0	0	0	0	0	0	0	0	0	0	5	0	0	0	0	0	0	0	0	0	0	0	0	71	0	0	0	0	16	0	0	0
OTU_499	k__Bacteria	p__Firmicutes	c__Clostridia	o__Clostridiales	f__	g__	s__	0	0	0	0	0	0	0	0	0	0	0	0	0	0	0	0	0	0	0	0	0	43	0	0	70	0	0	0	0	0	0	0	0	0	0	0	0
OTU_79	k__Bacteria	p__Bacteroidetes	c__Bacteroidia	o__Bacteroidales	f__S24-7	g__	s__	0	0	0	35	1	0	5	0	0	0	0	0	0	0	68	0	48	0	5	59	2	57	61	0	36	43	0	18	9	0	0	0	0	0	0	0	0
OTU_307	k__Bacteria	p__Cyanobacteria	c__Chloroplast	o__Streptophyta	f__	g__	s__	0	4	0	0	0	0	0	0	1	0	10	1	0	0	0	0	0	0	0	0	19	0	0	0	0	0	0	0	26	0	3	0	58	67	0	26	3
OTU_253	k__Bacteria	p__Proteobacteria	c__Betaproteobacteria	o__Neisseriales	f__Neisseriaceae	g__Neisseria	s__	0	0	0	0	0	0	0	0	0	0	0	0	0	0	0	0	0	0	0	0	0	0	0	0	0	0	0	0	7	0	0	1	0	66	0	0	0
OTU_133	k__Bacteria	p__Firmicutes	c__Clostridia	o__Clostridiales	f__Ruminococcaceae	g__	s__	4	30	55	1	4	1	11	0	0	0	0	0	0	0	0	5	18	0	7	1	0	1	8	0	1	19	6	2	0	0	0	0	4	0	1	0	64
OTU_547	k__Bacteria	p__Firmicutes	c__Clostridia	o__Clostridiales	f__Lachnospiraceae	g__Coprococcus	s__	5	47	64	0	2	0	0	0	0	0	0	0	0	0	13	0	12	0	6	2	0	0	1	0	0	0	0	13	0	0	0	0	0	0	0	3	6
OTU_173	k__Bacteria	p__Firmicutes	c__Clostridia	o__Clostridiales	f__Lachnospiraceae	g__	s__	2	8	37	7	5	0	0	0	0	0	0	0	0	0	5	21	62	0	7	11	2	3	14	0	11	8	4	13	0	0	0	0	1	0	0	0	19
OTU_181	k__Bacteria	p__Firmicutes	c__Clostridia	o__Clostridiales	f__	g__	s__	0	12	5	0	1	0	0	0	0	0	0	0	0	0	62	2	19	0	0	0	0	1	0	0	2	0	0	0	0	0	0	0	0	0	0	0	0
OTU_115	k__Bacteria	p__Firmicutes	c__Clostridia	o__Clostridiales	f__Lachnospiraceae	g__[Ruminococcus]	s__gnavus	5	17	61	17	5	0	0	0	0	0	0	0	0	0	0	4	28	0	3	28	4	28	23	0	20	8	0	0	2	0	0	0	0	0	0	0	13
OTU_145	k__Bacteria	p__Firmicutes	c__Erysipelotrichi	o__Erysipelotrichales	f__Erysipelotrichaceae	g__	s__	0	0	0	0	0	0	0	0	0	0	0	0	0	1	23	1	17	0	0	0	61	0	0	1	0	0	1	46	0	0	3	0	3	0	0	0	0
OTU_154	k__Bacteria	p__Firmicutes	c__Clostridia	o__Clostridiales	f__Ruminococcaceae	g__	s__	1	16	61	0	0	0	0	0	0	0	0	0	0	0	0	2	2	0	3	0	0	0	0	0	0	0	0	0	0	0	0	0	0	0	0	2	51
OTU_96	k__Bacteria	p__Bacteroidetes	c__Bacteroidia	o__Bacteroidales	f__S24-7	g__	s__	14	44	38	9	3	0	0	0	0	0	0	0	0	0	28	0	9	0	5	7	2	6	33	0	12	30	0	3	1	0	0	0	0	0	0	0	61
OTU_109	k__Bacteria	p__Firmicutes	c__Clostridia	o__Clostridiales	f__Ruminococcaceae	g__Ruminococcus	s__	13	20	31	0	0	0	0	0	0	0	0	0	0	1	38	5	48	0	0	0	0	58	5	0	58	6	2	11	9	0	0	0	0	0	0	0	60
OTU_216	k__Bacteria	p__Bacteroidetes	c__Bacteroidia	o__Bacteroidales	f__S24-7	g__	s__	5	16	13	0	0	0	0	0	0	0	0	0	0	0	0	0	0	0	0	0	0	0	0	0	0	0	0	0	0	0	0	0	0	0	0	0	59
OTU_130	k__Bacteria	p__Firmicutes	c__Clostridia	o__Clostridiales	f__Lachnospiraceae	NA	NA	5	22	31	0	0	0	0	0	0	0	0	0	0	0	44	7	56	0	2	1	0	3	0	0	2	6	1	9	0	0	0	0	0	0	0	0	58
OTU_172	k__Bacteria	p__Firmicutes	c__Clostridia	o__Clostridiales	f__	g__	s__	0	0	0	0	0	0	0	0	0	0	0	1	0	0	0	0	0	0	58	0	0	0	0	0	0	0	0	0	8	0	0	1	1	0	0	3	33
OTU_189	k__Bacteria	p__Firmicutes	c__Clostridia	o__Clostridiales	f__	g__	s__	0	0	0	0	0	0	0	0	0	0	0	0	0	0	2	8	58	0	0	0	0	0	0	0	0	0	5	11	0	0	0	0	0	9	0	0	0
OTU_210	k__Bacteria	p__TM7	c__TM7-3	o__CW040	f__F16	g__	s__	0	0	0	1	0	0	0	0	0	0	0	0	0	4	58	0	10	0	2	2	0	19	11	0	12	8	2	27	1	0	0	0	0	0	0	0	0
OTU_155	k__Bacteria	p__Firmicutes	c__Clostridia	o__Clostridiales	f__	g__	s__	0	17	57	0	4	0	0	0	0	0	0	0	0	0	3	4	5	0	0	1	0	1	43	0	3	24	0	5	0	0	0	0	0	0	0	0	10
OTU_191	k__Bacteria	p__Firmicutes	c__Clostridia	o__Clostridiales	f__Lachnospiraceae	g__	s__	0	37	7	0	1	0	0	0	0	0	0	0	0	0	0	0	0	0	6	0	0	0	0	0	0	0	0	1	2	0	1	0	0	0	0	0	57
OTU_152	k__Bacteria	p__Firmicutes	c__Clostridia	o__Clostridiales	f__Ruminococcaceae	g__	s__	2	32	56	0	5	0	0	0	0	0	0	0	0	0	0	0	0	0	1	0	0	2	1	0	0	2	0	0	0	0	0	0	0	0	0	0	40
OTU_168	k__Bacteria	p__Bacteroidetes	c__Bacteroidia	o__Bacteroidales	f__S24-7	g__	s__	0	2	0	0	0	0	53	0	8	0	0	15	0	0	2	6	16	0	5	0	0	0	0	0	0	0	0	10	38	0	2	2	0	12	0	0	0
OTU_183	k__Bacteria	p__Firmicutes	c__Bacilli	o__Lactobacillales	f__Streptococcaceae	g__Streptococcus	s__	0	0	0	2	0	3	1	0	0	0	5	0	0	0	0	0	3	0	0	7	3	2	0	0	3	1	0	6	5	0	14	1	50	53	1	14	2
OTU_156	k__Bacteria	p__Firmicutes	c__Clostridia	o__Clostridiales	f__Ruminococcaceae	g__Ruminococcus	s__	1	21	52	6	4	8	0	0	0	0	0	0	0	0	0	4	25	0	5	1	3	6	3	0	11	6	2	5	4	0	0	0	0	0	0	1	47
OTU_160	k__Bacteria	p__Firmicutes	c__Clostridia	o__Clostridiales	f__Lachnospiraceae	g__	s__	3	18	52	0	1	0	0	0	0	0	0	0	0	0	0	0	2	0	0	0	0	0	0	0	0	0	0	0	0	0	0	0	0	0	0	0	27
OTU_692	k__Bacteria	p__Firmicutes	c__Bacilli	o__Lactobacillales	f__Lactobacillaceae	g__Lactobacillus	NA	0	0	0	10	15	9	0	0	0	0	0	0	0	0	0	0	0	0	2	22	52	15	15	3	8	9	0	0	0	0	0	0	0	0	0	0	0
OTU_158	k__Bacteria	p__Firmicutes	c__Clostridia	o__Clostridiales	f__Ruminococcaceae	g__Oscillospira	s__	3	11	50	0	6	0	0	0	0	0	0	0	0	0	0	0	0	0	10	0	0	7	2	0	3	7	0	0	0	0	0	0	0	0	0	1	50
OTU_149	k__Bacteria	p__Firmicutes	c__Clostridia	o__Clostridiales	f__	g__	s__	2	4	22	1	0	1	0	0	0	0	0	0	0	0	49	3	27	0	2	4	0	3	4	0	6	3	0	12	0	0	0	0	0	0	0	0	1
OTU_146	k__Bacteria	p__Firmicutes	c__Clostridia	o__Clostridiales	f__	g__	s__	5	25	48	0	0	0	0	0	0	0	0	0	0	0	4	0	25	0	10	0	0	0	0	0	0	0	0	9	0	0	0	0	0	0	0	0	11
OTU_205	k__Bacteria	p__Firmicutes	c__Clostridia	o__Clostridiales	f__	g__	s__	0	0	0	0	0	0	11	0	0	0	0	13	0	0	0	0	0	0	4	0	0	0	0	0	2	0	0	0	0	0	14	7	48	4	0	7	0
OTU_141	k__Bacteria	p__Firmicutes	c__Clostridia	o__Clostridiales	f__Lachnospiraceae	g__	s__	0	0	0	0	47	0	0	0	0	0	0	0	0	0	7	0	5	0	15	0	2	32	0	0	37	0	0	0	13	0	3	1	15	5	0	0	0
OTU_220	k__Bacteria	p__Firmicutes	c__Clostridia	o__Clostridiales	f__	g__	s__	1	0	0	0	0	0	6	0	0	0	2	0	0	0	3	0	6	0	1	0	0	0	0	0	0	0	0	8	0	0	18	7	47	22	0	6	0
OTU_179	k__Bacteria	p__Bacteroidetes	c__Bacteroidia	o__Bacteroidales	f__[Paraprevotellaceae]	g__[Prevotella]	s__	0	0	0	0	0	0	10	0	0	0	0	0	0	0	0	7	2	0	46	0	0	0	0	0	0	0	0	0	24	0	0	3	0	5	0	0	0
OTU_865	k__Bacteria	p__Firmicutes	c__Bacilli	o__Lactobacillales	f__Lactobacillaceae	g__Lactobacillus	s__	46	0	1	0	6	1	0	0	0	0	2	1	0	0	0	0	0	0	1	3	2	0	5	0	2	0	0	0	0	0	0	0	0	0	0	1	0
OTU_127	k__Bacteria	p__Firmicutes	c__Clostridia	o__Clostridiales	f__Lachnospiraceae	g__	s__	2	2	1	45	2	0	0	0	0	0	0	0	0	0	7	0	15	0	0	38	0	43	20	0	31	28	1	0	0	0	0	0	0	0	0	0	3
OTU_202	k__Bacteria	p__Firmicutes	c__Clostridia	o__Clostridiales	f__Lachnospiraceae	g__	s__	0	0	0	0	0	0	0	0	0	0	0	0	0	0	0	0	0	0	0	0	0	45	0	0	40	0	0	0	0	0	0	0	0	0	0	0	0
OTU_412	k__Bacteria	p__Firmicutes	c__Clostridia	o__Clostridiales	f__Ruminococcaceae	g__Oscillospira	s__	2	22	37	3	3	0	0	0	0	0	0	0	0	0	2	4	12	0	0	4	0	5	2	0	3	4	1	0	0	0	0	0	0	0	0	2	44
OTU_142	k__Bacteria	p__Bacteroidetes	c__Bacteroidia	o__Bacteroidales	f__Rikenellaceae	g__	s__	0	0	0	32	0	0	13	0	0	0	0	0	0	0	10	0	2	0	1	32	3	5	43	0	5	20	2	6	0	0	0	0	0	0	0	0	0
OTU_159	k__Bacteria	p__Proteobacteria	c__Alphaproteobacteria	o__RF32	f__	g__	s__	0	0	0	1	2	1	0	0	0	0	0	0	0	0	0	0	0	0	2	2	1	16	35	0	17	42	0	0	0	0	0	0	0	0	0	0	0
OTU_881	k__Bacteria	p__Firmicutes	c__Bacilli	o__Lactobacillales	f__Lactobacillaceae	g__Lactobacillus	s__	0	0	0	4	9	7	0	0	0	0	0	0	0	0	0	0	0	0	1	6	42	10	9	0	6	3	0	0	0	0	0	0	0	0	0	0	0
OTU_175	k__Bacteria	p__Actinobacteria	c__Coriobacteriia	o__Coriobacteriales	f__Coriobacteriaceae	g__Adlercreutzia	s__	7	5	11	2	0	0	0	0	0	0	0	0	0	0	40	5	5	0	0	0	0	0	1	0	0	0	0	16	0	0	2	0	0	0	0	0	0
OTU_167	k__Bacteria	p__Firmicutes	c__Clostridia	o__Clostridiales	f__Lachnospiraceae	g__	s__	4	5	39	0	7	0	0	0	0	0	0	0	0	0	1	7	14	0	0	1	0	1	2	0	5	0	0	8	0	0	0	0	0	0	0	0	22
OTU_231	k__Bacteria	p__Firmicutes	c__Clostridia	o__Clostridiales	f__Lachnospiraceae	g__	s__	0	0	0	0	39	0	0	0	0	0	0	0	0	0	0	0	0	0	0	0	0	2	0	0	7	0	0	0	0	0	10	1	3	5	0	0	0
OTU_659	k__Bacteria	p__Firmicutes	c__Clostridia	o__Clostridiales	f__Ruminococcaceae	g__Oscillospira	s__	0	0	0	11	1	0	0	0	0	0	0	0	0	0	0	0	0	0	0	7	0	39	22	0	38	27	0	0	0	0	0	0	0	0	0	0	0
OTU_236	k__Bacteria	p__Tenericutes	c__Mollicutes	o__Mycoplasmatales	f__Mycoplasmataceae	g__Mycoplasma	s__	0	0	0	0	0	0	1	0	20	0	0	1	0	0	0	0	3	0	15	0	0	0	0	0	0	0	0	1	38	0	3	0	0	16	0	0	0
OTU_266	k__Bacteria	p__Firmicutes	c__Bacilli	o__Bacillales	f__Paenibacillaceae	g__Paenibacillus	s__	0	0	0	0	0	0	12	0	0	0	0	13	0	0	0	0	4	0	0	0	0	0	0	0	0	0	0	0	0	0	5	0	38	13	0	0	0
OTU_162	k__Bacteria	p__Bacteroidetes	c__Bacteroidia	o__Bacteroidales	f__S24-7	g__	s__	0	0	0	0	1	0	22	0	0	0	0	22	0	0	1	16	0	0	5	0	0	6	1	0	2	0	1	2	37	0	8	5	18	11	0	0	1
OTU_163	k__Bacteria	p__Firmicutes	c__Clostridia	o__Clostridiales	f__Lachnospiraceae	g__Coprococcus	s__	3	23	37	0	1	0	2	0	0	0	0	0	0	0	1	8	6	0	7	0	0	0	0	0	0	0	0	1	1	0	0	0	0	0	0	0	17
OTU_184	k__Bacteria	p__Firmicutes	c__Clostridia	o__Clostridiales	f__Peptococcaceae	g__	s__	0	14	15	0	0	0	0	0	0	0	0	0	0	0	0	0	0	0	1	0	0	1	0	0	0	0	0	0	0	0	0	0	0	0	0	0	37
OTU_200	k__Bacteria	p__Firmicutes	c__Clostridia	o__Clostridiales	f__Ruminococcaceae	g__Ruminococcus	s__	6	29	37	8	0	0	0	0	0	0	0	0	0	0	8	0	29	0	10	3	0	1	8	1	1	7	6	0	0	0	0	0	0	0	0	0	31
OTU_201	k__Bacteria	p__Proteobacteria	c__Gammaproteobacteria	o__Xanthomonadales	f__Xanthomonadaceae	g__	s__	0	0	0	2	0	0	0	0	0	0	0	0	0	0	0	0	0	0	0	3	37	0	1	13	1	1	0	0	0	0	0	1	0	0	0	0	0
OTU_161	k__Bacteria	p__Proteobacteria	c__Alphaproteobacteria	o__Sphingomonadales	f__Sphingomonadaceae	g__Sphingobium	s__	0	3	3	1	1	22	0	0	0	0	5	0	0	0	0	0	0	0	0	3	3	0	0	0	3	0	0	0	0	0	7	2	1	3	0	36	10
OTU_171	k__Bacteria	p__Proteobacteria	c__Betaproteobacteria	o__Burkholderiales	f__Burkholderiaceae	g__Burkholderia	s__	10	6	27	7	16	6	36	0	3	0	6	1	0	1	16	7	22	0	10	0	0	0	0	1	3	1	1	7	10	0	7	2	12	15	0	12	4
OTU_190	k__Bacteria	p__Firmicutes	c__Clostridia	o__Clostridiales	f__	g__	s__	0	0	0	0	0	0	0	0	0	0	0	0	0	0	0	0	0	0	0	0	1	36	0	0	34	0	0	0	0	0	0	0	0	0	0	0	0
OTU_196	k__Bacteria	p__Firmicutes	c__Clostridia	o__Clostridiales	f__Ruminococcaceae	g__	s__	0	29	36	1	4	0	0	0	0	0	0	0	0	0	0	0	0	0	5	0	0	1	22	0	2	13	0	0	0	0	0	0	0	0	0	0	15
OTU_363	k__Bacteria	p__Firmicutes	c__Clostridia	o__Clostridiales	f__Clostridiaceae	g__	s__	0	0	0	0	0	0	36	0	0	0	0	0	0	0	0	0	0	0	0	0	0	0	0	0	0	0	0	0	0	0	0	0	5	0	0	1	0
OTU_756	k__Bacteria	p__Firmicutes	c__Clostridia	o__Clostridiales	f__	g__	s__	0	1	4	17	0	0	0	0	0	0	0	1	0	0	20	0	36	0	1	10	0	2	0	0	3	1	0	13	0	0	1	0	0	1	0	0	0
OTU_148	k__Bacteria	p__Proteobacteria	c__Betaproteobacteria	o__Burkholderiales	f__Alcaligenaceae	g__Sutterella	s__	0	0	0	6	18	8	0	0	0	0	0	0	0	0	0	0	0	0	0	11	14	14	35	1	5	26	0	0	0	0	0	0	0	2	0	0	0
OTU_807	k__Bacteria	p__Firmicutes	c__Clostridia	o__Clostridiales	f__	g__	s__	0	0	0	0	0	2	0	0	0	0	0	0	0	0	0	0	0	0	0	0	0	0	0	0	0	0	0	0	0	0	4	9	35	15	0	2	0
OTU_153	k__Bacteria	p__Proteobacteria	c__Gammaproteobacteria	o__Pseudomonadales	f__Moraxellaceae	g__Acinetobacter	s__	0	0	0	0	1	6	23	0	17	0	0	9	0	0	0	34	7	0	3	0	0	0	0	28	0	0	1	0	2	0	0	1	0	0	0	12	0
OTU_217	k__Bacteria	p__Firmicutes	c__Clostridia	o__Clostridiales	f__	g__	s__	2	17	33	0	0	0	0	0	0	0	0	0	0	0	0	0	0	0	0	0	0	0	0	0	0	0	0	0	0	0	0	0	0	0	0	0	12
OTU_193	k__Bacteria	p__Bacteroidetes	c__Bacteroidia	o__Bacteroidales	f__S24-7	g__	s__	0	1	0	0	0	0	3	0	3	0	0	20	0	0	32	4	14	0	6	0	0	20	1	0	18	0	0	7	8	0	0	0	3	21	0	0	0
OTU_212	k__Bacteria	p__Proteobacteria	c__Gammaproteobacteria	o__Pseudomonadales	f__Pseudomonadaceae	g__Pseudomonas	s__	0	0	0	0	0	0	0	0	0	0	0	0	0	0	0	0	0	0	0	0	0	1	0	0	2	0	0	0	5	0	13	9	32	15	0	0	0
OTU_177	k__Bacteria	p__Firmicutes	c__Clostridia	o__Clostridiales	f__[Mogibacteriaceae]	g__	s__	0	0	0	0	0	0	0	0	0	0	0	0	0	0	27	0	31	0	0	1	0	0	13	0	2	9	0	9	0	0	0	0	0	0	0	0	0
OTU_195	k__Bacteria	p__Bacteroidetes	c__Bacteroidia	o__Bacteroidales	f__S24-7	g__	s__	0	7	0	0	0	0	10	0	24	0	0	13	0	0	4	31	3	0	1	0	0	0	0	0	0	1	2	7	19	0	3	1	2	3	0	1	3
OTU_215	k__Bacteria	p__Actinobacteria	c__Actinobacteria	o__Bifidobacteriales	f__Bifidobacteriaceae	g__Bifidobacterium	NA	0	1	0	0	0	0	3	0	0	0	0	0	0	0	0	31	0	0	0	0	0	0	0	0	1	0	0	0	6	0	3	0	10	0	0	4	0
OTU_264	k__Bacteria	p__Firmicutes	c__Clostridia	o__Clostridiales	f__Ruminococcaceae	g__	s__	0	0	0	0	1	0	0	0	0	0	0	0	0	0	0	0	0	0	31	0	0	0	0	0	0	0	0	0	5	0	0	0	10	4	0	0	0
OTU_182	k__Bacteria	p__Bacteroidetes	c__[Saprospirae]	o__[Saprospirales]	f__Chitinophagaceae	g__	s__	0	2	0	0	0	6	26	0	9	0	0	0	0	0	0	0	15	0	19	0	0	0	0	0	3	0	1	8	30	0	0	0	0	14	0	0	0
OTU_188	k__Bacteria	p__Firmicutes	c__Clostridia	o__Clostridiales	f__Ruminococcaceae	g__Oscillospira	s__	1	9	14	5	2	0	0	0	0	0	0	0	0	0	1	9	14	0	5	1	1	7	17	1	17	13	0	2	0	0	0	0	0	0	0	0	30
OTU_194	k__Bacteria	p__Firmicutes	c__Clostridia	o__Clostridiales	f__	g__	s__	0	0	0	8	1	1	0	0	0	0	0	0	0	0	0	0	0	0	1	6	1	19	30	0	19	11	0	0	0	0	0	0	0	0	0	0	0
OTU_238	k__Bacteria	p__Proteobacteria	c__Gammaproteobacteria	o__Pseudomonadales	f__Moraxellaceae	NA	NA	0	0	0	0	0	0	30	0	0	0	0	0	0	0	0	8	7	0	11	0	0	0	0	0	0	0	1	0	14	1	0	0	0	0	0	0	0
OTU_242	k__Bacteria	p__Firmicutes	c__Clostridia	o__Clostridiales	f__	g__	s__	0	8	30	0	2	0	0	0	0	0	0	0	0	0	0	0	4	0	0	2	0	5	3	0	2	6	0	0	0	0	0	0	6	0	0	0	5
OTU_297	k__Bacteria	p__Proteobacteria	c__Gammaproteobacteria	o__Pasteurellales	f__Pasteurellaceae	g__Haemophilus	NA	0	0	0	0	0	0	2	0	4	0	0	2	0	0	0	0	1	0	0	0	0	0	0	0	0	0	0	0	4	0	2	0	1	30	1	0	0
OTU_272	k__Bacteria	p__Proteobacteria	c__Gammaproteobacteria	o__Pseudomonadales	f__Pseudomonadaceae	g__Pseudomonas	s__	0	0	1	0	2	0	0	0	0	0	2	5	0	0	2	0	1	0	1	0	0	0	1	0	0	0	0	0	0	0	6	2	13	29	0	2	1
OTU_483	k__Bacteria	p__Bacteroidetes	c__Bacteroidia	o__Bacteroidales	f__Bacteroidaceae	g__Bacteroides	s__	0	0	0	0	0	0	0	0	0	0	0	15	0	0	0	0	1	0	1	0	0	0	0	0	0	0	0	0	2	0	5	2	14	29	0	0	0
OTU_323	k__Bacteria	p__Proteobacteria	c__Betaproteobacteria	o__Burkholderiales	f__Alcaligenaceae	g__Sutterella	s__	0	0	0	0	0	0	0	0	0	0	0	0	0	0	0	3	0	0	0	0	0	0	0	0	0	0	0	0	0	0	1	5	28	0	0	0	0
OTU_538	k__Bacteria	p__Bacteroidetes	c__Bacteroidia	o__Bacteroidales	f__Bacteroidaceae	g__Bacteroides	s__	0	0	0	0	0	0	0	0	0	0	0	0	0	0	2	0	0	0	0	0	0	0	0	0	0	0	0	0	0	0	5	3	20	28	0	1	0
OTU_185	k__Bacteria	p__Firmicutes	c__Clostridia	o__Clostridiales	f__Lachnospiraceae	g__	s__	0	0	0	10	4	0	0	0	0	0	0	0	0	0	0	0	0	0	0	24	0	0	27	0	0	13	0	0	0	0	0	0	0	0	0	0	0
OTU_239	k__Bacteria	p__Firmicutes	c__Clostridia	o__Clostridiales	f__	g__	s__	0	0	1	0	0	0	5	0	0	0	0	0	0	0	0	0	5	0	0	0	0	0	11	0	0	5	0	0	0	0	8	2	27	10	0	0	0
OTU_267	k__Bacteria	p__Actinobacteria	c__Coriobacteriia	o__Coriobacteriales	f__Coriobacteriaceae	g__Adlercreutzia	s__	0	1	2	0	0	0	0	0	0	0	0	0	0	0	27	0	3	0	0	1	0	0	0	0	0	0	0	2	0	0	0	0	0	0	0	0	0
OTU_677	k__Bacteria	p__Proteobacteria	c__Gammaproteobacteria	o__Enterobacteriales	f__Enterobacteriaceae	g__	s__	0	1	0	0	0	5	0	0	0	0	0	0	0	0	0	15	0	0	0	0	0	0	0	0	0	0	0	0	3	0	1	0	27	4	0	0	0
OTU_198	k__Bacteria	p__Bacteroidetes	c__Bacteroidia	o__Bacteroidales	f__S24-7	g__	s__	0	0	0	3	0	0	0	0	0	0	0	0	0	0	0	0	0	0	0	8	1	8	26	0	1	15	0	0	0	0	0	0	0	0	0	0	0
OTU_199	k__Bacteria	p__Firmicutes	c__Clostridia	o__Clostridiales	f__Ruminococcaceae	g__	s__	0	7	13	3	7	0	0	0	0	0	0	0	0	0	2	0	26	0	1	3	0	1	8	0	9	4	0	2	0	0	0	0	0	0	0	0	14
OTU_286	k__Bacteria	p__Firmicutes	c__Bacilli	o__Lactobacillales	f__Aerococcaceae	g__Aerococcus	s__	0	0	0	0	1	0	26	0	0	0	0	0	0	0	0	0	0	0	0	0	1	0	0	0	2	0	0	0	0	0	3	0	0	0	0	0	0
OTU_312	k__Bacteria	p__Firmicutes	c__Bacilli	o__Gemellales	f__Gemellaceae	g__	s__	0	0	0	0	0	0	0	0	0	0	0	0	0	0	0	0	0	0	0	0	0	0	0	0	0	0	0	0	0	0	0	0	0	26	0	0	0
OTU_234	k__Bacteria	p__Firmicutes	c__Clostridia	o__Clostridiales	f__Ruminococcaceae	g__	s__	1	6	25	2	0	0	0	0	0	0	0	0	0	0	0	0	2	0	0	0	0	0	1	0	0	1	0	1	0	0	0	0	0	0	0	0	0
OTU_244	k__Bacteria	p__Proteobacteria	c__Alphaproteobacteria	o__RF32	f__	g__	s__	0	0	0	0	3	0	0	0	0	0	0	0	0	0	0	0	0	0	0	0	0	14	0	0	25	0	0	0	0	0	0	0	0	0	0	0	0
OTU_268	k__Bacteria	p__Actinobacteria	c__Coriobacteriia	o__Coriobacteriales	f__Coriobacteriaceae	g__Adlercreutzia	s__	0	1	0	2	0	0	0	0	0	0	0	0	0	0	7	3	3	0	0	1	2	1	0	0	0	0	0	25	0	0	0	0	1	3	0	0	1
OTU_281	k__Bacteria	p__Firmicutes	c__Clostridia	o__Clostridiales	f__Lachnospiraceae	g__Coprococcus	s__	0	0	0	0	1	0	0	0	0	0	0	0	0	0	0	0	0	0	0	0	0	0	25	0	1	10	0	0	7	0	2	0	0	0	0	0	0
OTU_622	k__Bacteria	p__Firmicutes	c__Bacilli	o__Lactobacillales	f__Lactobacillaceae	g__Lactobacillus	s__	0	0	0	12	14	25	0	0	0	0	0	0	0	0	0	0	0	0	0	24	7	16	22	0	14	11	0	0	0	0	0	0	0	0	0	0	0
OTU_203	k__Bacteria	p__Firmicutes	c__Clostridia	o__Clostridiales	f__Lachnospiraceae	g__	s__	0	1	0	0	0	0	0	0	0	0	0	0	0	0	1	0	15	0	22	0	0	0	0	0	0	0	1	24	0	0	0	0	0	0	0	0	0
OTU_224	k__Bacteria	p__Firmicutes	c__Clostridia	o__Clostridiales	f__	g__	s__	0	0	0	5	0	0	0	0	0	0	0	0	0	0	13	0	24	0	0	1	1	0	0	0	1	1	0	4	0	0	0	0	0	0	0	0	0
OTU_225	k__Bacteria	p__Firmicutes	c__Clostridia	o__Clostridiales	f__Ruminococcaceae	g__Ruminococcus	s__	2	11	11	1	0	0	0	0	0	0	0	0	0	1	21	0	24	0	0	0	0	11	0	0	4	0	0	0	0	0	0	0	0	0	0	0	6
OTU_314	k__Bacteria	p__Proteobacteria	c__Gammaproteobacteria	o__Pseudomonadales	f__Moraxellaceae	g__Enhydrobacter	s__	0	0	0	0	0	0	0	0	0	0	0	13	0	0	0	24	0	0	0	0	0	0	0	0	0	0	0	0	0	0	0	0	2	0	0	0	0
OTU_625	k__Bacteria	p__Firmicutes	c__Clostridia	o__Clostridiales	f__Lachnospiraceae	g__[Ruminococcus]	s__gnavus	0	2	0	0	24	0	0	0	0	0	0	0	0	0	0	0	0	0	0	0	0	1	0	0	1	0	0	0	0	0	0	0	0	0	0	0	0
OTU_186	k__Bacteria	p__Bacteroidetes	c__Bacteroidia	o__Bacteroidales	f__	g__	s__	0	0	0	20	0	0	0	0	0	0	0	0	0	0	0	0	0	0	0	23	0	7	11	0	4	1	0	0	0	0	0	0	0	0	0	0	0
OTU_277	k__Bacteria	p__Firmicutes	c__Clostridia	o__Clostridiales	f__Lachnospiraceae	g__	s__	0	0	0	0	0	0	0	0	0	0	0	0	0	0	0	0	0	0	23	0	0	0	0	0	0	0	0	0	0	0	0	0	2	6	0	0	0
OTU_298	k__Bacteria	p__Firmicutes	c__Clostridia	o__Clostridiales	f__Ruminococcaceae	g__Ruminococcus	s__	0	13	13	1	0	0	0	0	0	0	0	0	0	0	0	0	0	0	0	1	1	9	3	0	2	4	0	0	0	0	0	0	0	0	0	0	23
OTU_321	k__Bacteria	p__Firmicutes	c__Clostridia	o__Clostridiales	f__Ruminococcaceae	g__	s__	0	0	0	0	0	0	4	0	9	0	0	0	0	0	0	0	0	0	5	0	0	0	0	0	0	0	0	5	23	0	1	0	0	0	0	0	0
OTU_623	k__Bacteria	p__Firmicutes	c__Clostridia	o__Clostridiales	f__	g__	s__	1	0	0	19	0	0	0	0	0	0	0	0	0	0	0	0	0	0	0	17	0	20	6	0	23	4	0	0	0	0	0	0	0	0	0	0	0
OTU_209	k__Bacteria	p__Firmicutes	c__Clostridia	o__Clostridiales	f__Lachnospiraceae	g__	s__	1	6	22	0	3	0	0	0	0	0	0	0	0	0	8	0	12	0	0	0	0	1	7	0	4	5	1	15	0	0	0	0	0	0	0	0	3
OTU_222	k__Bacteria	p__Firmicutes	c__Clostridia	o__Clostridiales	f__Lachnospiraceae	g__[Ruminococcus]	s__gnavus	0	0	0	0	7	2	0	0	0	0	0	0	0	0	0	0	0	0	0	0	3	9	0	0	22	0	0	0	0	0	0	0	0	0	0	0	0
OTU_230	k__Bacteria	p__Firmicutes	c__Erysipelotrichi	o__Erysipelotrichales	f__Erysipelotrichaceae	g__	s__	0	0	0	0	1	0	0	0	0	0	0	0	0	0	0	0	0	0	0	0	5	22	0	0	12	0	0	0	0	0	0	0	0	0	0	0	0
OTU_241	k__Bacteria	p__Firmicutes	c__Erysipelotrichi	o__Erysipelotrichales	f__Erysipelotrichaceae	g__	s__	0	0	0	9	0	1	0	0	0	0	1	0	0	0	22	6	19	0	4	20	0	0	0	0	0	0	0	0	0	0	0	0	0	0	0	0	0
OTU_535	k__Bacteria	p__Firmicutes	c__Clostridia	o__Clostridiales	f__Veillonellaceae	g__Veillonella	s__dispar	0	0	0	0	0	2	12	0	0	0	0	0	0	0	0	0	0	0	0	0	0	0	0	0	0	0	0	0	0	0	0	0	0	22	0	0	1
OTU_704	k__Bacteria	p__Firmicutes	c__Clostridia	o__Clostridiales	f__Lachnospiraceae	g__Blautia	s__	0	0	0	0	0	0	0	0	0	0	0	0	0	0	0	0	0	0	0	0	22	0	0	1	0	1	0	0	0	0	0	0	0	0	0	0	0
OTU_240	k__Bacteria	p__Firmicutes	c__Clostridia	o__Clostridiales	f__[Mogibacteriaceae]	g__	s__	1	3	2	0	0	0	0	0	0	0	0	0	0	0	21	0	2	0	0	2	0	1	3	0	1	2	0	0	0	0	0	0	0	0	0	0	2
OTU_247	k__Bacteria	p__Firmicutes	c__Clostridia	o__Clostridiales	f__Clostridiaceae	g__Clostridium	s__	0	0	0	0	0	0	0	0	0	0	0	0	0	0	0	0	0	0	0	0	0	21	0	0	13	0	0	0	0	0	0	0	0	0	0	0	0
OTU_259	k__Bacteria	p__Firmicutes	c__Erysipelotrichi	o__Erysipelotrichales	f__Erysipelotrichaceae	g__	s__	0	0	0	0	0	0	0	0	0	0	0	0	0	0	21	1	2	0	0	0	0	0	1	0	0	1	0	3	0	0	0	0	3	0	0	0	0
OTU_293	k__Bacteria	p__Firmicutes	c__Bacilli	o__Lactobacillales	f__Aerococcaceae	NA	NA	0	0	0	0	0	0	0	0	0	0	0	0	0	0	0	0	0	0	0	0	0	0	0	0	0	0	0	0	0	0	0	0	0	21	0	0	0
OTU_295	k__Bacteria	p__Bacteroidetes	c__Bacteroidia	o__Bacteroidales	f__Rikenellaceae	g__	s__	0	0	0	0	0	0	21	0	0	0	0	0	0	0	0	0	0	0	0	0	0	0	0	0	0	0	0	1	0	0	0	0	0	0	0	0	0
OTU_325	k__Bacteria	p__Actinobacteria	c__Thermoleophilia	o__Gaiellales	f__Gaiellaceae	g__	s__	0	0	0	0	0	0	21	0	0	0	0	0	0	0	0	0	0	0	0	0	0	0	0	0	0	0	0	0	0	0	0	0	0	0	0	0	0
OTU_630	k__Bacteria	p__Proteobacteria	c__Gammaproteobacteria	o__Pseudomonadales	f__Pseudomonadaceae	g__Pseudomonas	s__	0	0	1	0	0	0	0	0	6	0	1	8	0	0	1	16	8	2	21	0	0	0	0	0	0	0	0	15	5	0	3	0	3	1	1	0	2
OTU_208	k__Bacteria	p__Firmicutes	c__Erysipelotrichi	o__Erysipelotrichales	f__Erysipelotrichaceae	g__Allobaculum	s__	0	0	0	0	0	0	8	0	0	0	0	0	0	0	5	10	2	0	7	0	0	0	0	0	0	0	1	0	20	0	12	0	3	0	0	0	0
OTU_229	k__Bacteria	p__Firmicutes	c__Clostridia	o__Clostridiales	f__Ruminococcaceae	g__	s__	1	19	20	0	0	0	0	0	0	0	0	0	0	0	0	0	0	0	0	0	0	0	0	0	0	0	0	0	0	0	0	0	0	0	0	0	6
OTU_337	k__Bacteria	p__Firmicutes	c__Clostridia	o__Clostridiales	f__Peptostreptococcaceae	g__Peptostreptococcus	s__anaerobius	0	0	0	0	0	0	0	0	0	0	1	0	0	0	0	0	0	0	0	0	0	0	0	0	0	0	0	0	0	0	1	0	1	20	0	0	0
OTU_366	k__Bacteria	p__Firmicutes	c__Clostridia	o__Clostridiales	f__Lachnospiraceae	g__	s__	0	1	0	0	0	0	0	0	0	0	0	0	0	0	0	0	0	0	0	0	0	0	0	0	0	0	0	0	0	0	0	0	6	0	0	0	20
OTU_399	k__Bacteria	p__Firmicutes	c__Clostridia	o__Clostridiales	f__Ruminococcaceae	g__Oscillospira	s__	0	0	0	0	0	0	0	0	20	0	0	0	0	0	0	0	0	0	0	0	0	0	0	0	0	0	0	0	0	0	0	0	0	0	0	0	0
OTU_170	k__Bacteria	p__Firmicutes	c__Clostridia	o__Clostridiales	f__Ruminococcaceae	g__	s__	0	0	0	11	0	0	0	0	0	0	0	0	0	0	0	0	0	0	0	14	9	19	3	0	18	0	0	0	0	0	0	1	0	0	0	0	0
OTU_178	k__Bacteria	p__Firmicutes	c__Clostridia	o__Clostridiales	f__	g__	s__	0	0	0	11	1	0	0	0	0	0	0	0	0	0	12	3	10	0	9	19	0	4	4	0	4	0	0	1	0	0	0	0	6	0	0	0	0
OTU_304	k__Bacteria	p__Proteobacteria	c__Betaproteobacteria	o__Neisseriales	f__Neisseriaceae	g__Kingella	s__	0	0	0	0	0	0	0	0	19	0	0	0	0	0	0	0	0	0	0	0	0	0	0	0	0	0	0	0	0	0	0	0	0	0	0	0	0
OTU_343	k__Bacteria	p__Proteobacteria	c__Betaproteobacteria	o__Methylophilales	f__Methylophilaceae	g__	s__	0	0	0	0	0	0	0	0	0	0	0	19	0	0	0	0	0	0	0	0	0	0	0	0	0	0	0	0	0	0	0	0	0	0	0	0	0
OTU_353	k__Bacteria	p__Verrucomicrobia	c__Opitutae	o__Opitutales	f__Opitutaceae	g__Opitutus	s__	0	0	0	0	0	0	0	0	0	0	0	0	0	0	0	19	0	0	0	0	0	0	0	0	0	0	0	0	0	0	0	0	0	0	0	0	0
OTU_388	k__Bacteria	p__Bacteroidetes	c__Sphingobacteriia	o__Sphingobacteriales	f__	g__	s__	0	0	0	0	0	0	19	0	0	0	0	0	0	0	0	0	0	0	0	0	0	0	0	0	0	0	0	0	0	0	0	0	0	0	0	0	0
OTU_684	k__Bacteria	p__Bacteroidetes	c__Bacteroidia	o__Bacteroidales	f__Bacteroidaceae	g__Bacteroides	s__acidifaciens	2	2	0	3	0	0	0	0	0	0	0	0	0	0	1	0	0	0	0	8	0	19	6	0	12	2	0	0	0	0	0	0	0	0	0	0	1
OTU_176	k__Bacteria	p__Proteobacteria	c__Betaproteobacteria	o__Burkholderiales	f__Comamonadaceae	g__	s__	0	0	0	0	0	0	7	0	11	0	1	17	2	18	0	12	3	0	2	0	0	0	0	7	0	0	0	1	0	0	8	0	4	2	0	2	1
OTU_207	k__Bacteria	p__Firmicutes	c__Clostridia	o__Clostridiales	f__	g__	s__	6	6	14	0	0	0	0	0	0	0	0	0	0	0	0	0	0	0	0	0	0	3	0	0	1	0	0	0	0	0	0	0	0	0	0	2	18
OTU_233	k__Bacteria	p__Firmicutes	c__Clostridia	o__Clostridiales	f__	g__	s__	4	8	18	2	0	2	0	0	0	0	0	0	0	0	0	0	9	0	0	0	0	1	0	0	0	0	0	0	0	0	0	0	3	6	0	0	1
OTU_275	k__Bacteria	p__Bacteroidetes	c__Bacteroidia	o__Bacteroidales	f__Prevotellaceae	g__Prevotella	s__	0	0	0	0	0	0	0	0	0	0	0	0	0	0	0	0	0	0	0	0	0	0	0	0	0	0	0	0	18	0	0	0	0	15	0	0	0
OTU_313	k__Bacteria	p__Firmicutes	c__Clostridia	o__Clostridiales	f__Ruminococcaceae	g__Ruminococcus	s__	0	12	9	0	0	0	0	0	0	0	0	0	0	0	0	0	0	0	5	0	0	4	0	0	2	0	0	0	2	0	0	0	0	0	0	0	18
OTU_362	k__Bacteria	p__Firmicutes	c__Clostridia	o__Clostridiales	f__Ruminococcaceae	g__	s__	0	0	0	0	0	0	18	0	0	0	0	0	0	0	0	0	0	0	0	0	0	0	0	0	0	0	0	0	1	0	0	0	0	0	0	0	0
OTU_365	k__Bacteria	p__Actinobacteria	c__Actinobacteria	o__Actinomycetales	f__Actinomycetaceae	g__Actinomyces	s__	0	0	0	0	0	0	0	0	0	0	0	0	0	0	0	0	0	0	0	0	0	0	0	0	0	0	0	0	0	0	0	0	5	18	0	0	0
OTU_444	k__Bacteria	p__Firmicutes	c__Clostridia	o__Clostridiales	f__Ruminococcaceae	g__Oscillospira	s__	0	0	0	15	0	0	0	0	0	0	0	10	0	0	0	0	0	0	4	10	3	8	15	0	9	18	0	0	0	0	0	0	0	0	0	0	0
OTU_452	k__Bacteria	p__Firmicutes	c__Bacilli	o__Lactobacillales	f__Lactobacillaceae	g__Lactobacillus	s__	0	0	0	0	0	0	0	0	0	0	0	0	0	0	0	0	0	0	0	8	5	18	10	0	10	7	0	0	0	0	0	0	0	0	0	0	0
OTU_174	k__Bacteria	p__Firmicutes	c__Clostridia	o__Clostridiales	f__Clostridiaceae	g__Candidatus Arthromitus	s__	0	0	0	1	3	0	0	0	0	0	0	0	0	0	0	0	1	0	0	13	0	6	17	0	7	17	0	12	0	0	0	0	0	0	0	0	2
OTU_180	k__Bacteria	p__Proteobacteria	c__Betaproteobacteria	o__Burkholderiales	f__Comamonadaceae	g__	s__	1	0	0	0	1	0	0	0	1	3	5	17	1	2	2	16	0	3	0	1	0	0	2	0	0	1	0	3	2	0	8	0	2	0	2	1	13
OTU_206	k__Bacteria	p__Firmicutes	c__Clostridia	o__Clostridiales	f__Lachnospiraceae	g__	s__	0	0	0	0	3	0	0	0	0	0	0	0	0	0	0	0	0	0	0	4	7	14	4	0	17	3	0	0	0	0	0	0	0	0	0	0	0
OTU_271	k__Bacteria	p__Firmicutes	c__Clostridia	o__Clostridiales	f__	g__	s__	4	2	17	0	0	0	0	0	0	0	0	0	0	0	0	0	0	0	0	0	0	0	1	0	0	0	0	0	0	0	0	0	0	0	0	0	0
OTU_283	k__Bacteria	p__Firmicutes	c__Bacilli	o__Turicibacterales	f__Turicibacteraceae	g__Turicibacter	s__	0	0	0	0	0	2	17	0	0	0	0	0	0	0	0	0	3	0	7	0	0	0	0	0	0	0	0	1	7	2	0	0	4	0	0	0	0
OTU_292	k__Bacteria	p__Cyanobacteria	c__4C0d-2	o__YS2	f__	g__	s__	0	0	0	0	0	0	0	0	0	0	0	0	0	0	0	0	0	0	0	0	0	0	0	0	0	0	0	0	17	0	0	0	0	0	0	0	1
OTU_211	k__Bacteria	p__Firmicutes	c__Clostridia	o__Clostridiales	f__Christensenellaceae	g__	s__	0	0	0	9	1	0	0	0	0	0	0	0	0	0	0	0	0	0	0	3	2	16	10	0	11	5	0	0	0	0	0	0	0	0	0	0	0
OTU_237	k__Bacteria	p__Bacteroidetes	c__Bacteroidia	o__Bacteroidales	f__S24-7	g__	s__	0	2	0	0	0	0	0	0	1	0	0	16	0	0	2	0	5	0	1	0	0	0	0	0	0	0	0	1	10	0	2	0	1	14	0	0	0
OTU_273	k__Bacteria	p__Firmicutes	c__Clostridia	o__Clostridiales	f__	g__	s__	0	6	16	0	3	0	0	0	0	0	0	0	0	0	0	0	0	0	4	0	0	0	0	0	0	0	0	0	0	0	0	0	0	0	0	0	9
OTU_276	k__Bacteria	p__Proteobacteria	c__Gammaproteobacteria	o__Chromatiales	f__Ectothiorhodospiraceae	g__	s__	0	0	0	0	0	0	16	0	0	0	0	0	0	0	1	0	1	0	0	0	0	0	0	0	0	0	0	0	5	0	1	0	2	0	0	0	0
OTU_303	k__Bacteria	p__Bacteroidetes	c__Bacteroidia	o__Bacteroidales	f__S24-7	g__	s__	0	0	0	0	0	0	0	0	0	0	0	0	0	0	0	0	0	0	0	0	0	0	0	0	0	0	0	0	16	0	0	0	0	1	0	0	0
OTU_305	k__Bacteria	p__Proteobacteria	c__Alphaproteobacteria	o__Rhizobiales	f__Rhizobiaceae	g__Rhizobium	s__	1	0	0	0	0	0	0	0	0	0	0	16	0	0	0	0	0	0	0	0	0	0	0	0	0	0	0	0	0	0	0	0	0	0	0	0	0
OTU_341	k__Bacteria	p__Proteobacteria	c__Deltaproteobacteria	o__Myxococcales	f__Haliangiaceae	g__	s__	0	0	0	0	0	0	0	0	16	0	0	0	0	0	0	0	0	0	0	0	0	0	0	0	0	0	0	0	0	0	0	0	0	0	0	0	0
OTU_367	k__Bacteria	p__Firmicutes	c__Clostridia	o__Clostridiales	f__	g__	s__	0	0	0	0	5	0	0	0	0	0	0	0	0	0	0	0	0	0	0	0	0	3	0	0	16	0	0	0	0	0	0	0	0	0	0	0	0
OTU_192	k__Bacteria	p__Firmicutes	c__Clostridia	o__Clostridiales	f__Lachnospiraceae	g__Coprococcus	s__	0	0	0	0	15	0	0	0	0	0	0	0	0	0	0	0	0	0	6	1	0	13	14	0	14	7	0	0	0	0	0	0	0	0	0	0	0
OTU_227	k__Bacteria	p__Cyanobacteria	c__Oscillatoriophycideae	o__Chroococcales	f__Xenococcaceae	g__	s__	0	2	1	0	0	0	0	0	0	0	0	15	0	0	3	14	7	0	10	0	0	0	0	0	0	0	0	3	9	0	0	1	0	2	0	1	0
OTU_228	k__Bacteria	p__Bacteroidetes	c__Bacteroidia	o__Bacteroidales	f__S24-7	g__	s__	6	13	12	0	0	0	0	0	0	0	0	0	0	0	0	0	0	0	0	0	0	0	0	0	0	0	0	0	0	0	0	0	0	0	0	0	15
OTU_232	k__Bacteria	p__Firmicutes	c__Clostridia	o__Clostridiales	f__	g__	s__	1	0	0	5	1	0	0	0	0	0	0	0	0	0	0	0	0	0	0	2	0	7	5	0	15	3	0	0	0	0	0	0	1	2	0	0	0
OTU_235	k__Bacteria	p__Proteobacteria	c__Gammaproteobacteria	o__Pseudomonadales	f__Moraxellaceae	g__Acinetobacter	s__	0	1	0	0	0	1	10	0	3	0	2	15	3	0	10	0	0	0	9	0	8	0	0	0	2	1	0	1	7	0	6	2	1	7	0	0	0
OTU_249	k__Bacteria	p__Firmicutes	c__Clostridia	o__Clostridiales	f__	g__	s__	0	0	0	15	0	0	0	0	0	0	0	0	0	0	0	0	0	0	0	10	0	1	2	0	5	2	0	0	0	0	0	0	0	0	0	0	0
OTU_251	k__Bacteria	p__Firmicutes	c__Clostridia	o__Clostridiales	f__	g__	s__	0	0	0	0	0	0	0	0	0	0	0	0	0	0	15	0	8	0	0	0	0	3	0	0	0	0	0	14	0	0	0	0	0	0	0	0	0
OTU_252	k__Bacteria	p__Firmicutes	c__Clostridia	o__Clostridiales	f__	g__	s__	0	0	0	0	3	0	0	0	0	0	0	0	0	0	3	0	9	0	0	0	0	0	9	0	0	15	0	0	0	0	0	0	0	0	0	0	2
OTU_274	k__Bacteria	p__Firmicutes	c__Clostridia	o__Clostridiales	f__Ruminococcaceae	g__Oscillospira	s__	0	0	0	1	3	0	0	0	0	0	0	0	0	0	0	0	15	0	7	2	0	0	3	0	0	0	1	2	0	0	0	0	0	0	0	0	0
OTU_279	k__Bacteria	p__Firmicutes	c__Clostridia	o__Clostridiales	f__Lachnospiraceae	g__[Ruminococcus]	s__gnavus	0	0	0	0	0	0	0	0	0	0	0	0	0	0	0	0	0	0	0	0	0	10	0	0	15	0	0	0	0	0	0	0	0	0	0	0	0
OTU_289	k__Bacteria	p__Firmicutes	c__Clostridia	o__Clostridiales	f__	g__	s__	0	0	0	0	0	0	0	0	0	0	0	0	0	0	0	0	0	0	0	0	0	9	0	0	15	0	0	0	0	0	0	0	0	0	0	0	0
OTU_326	k__Bacteria	p__Firmicutes	c__Bacilli	o__Lactobacillales	f__Leuconostocaceae	g__	s__	0	0	0	0	0	0	0	0	0	0	15	0	0	0	0	0	0	0	0	0	0	0	0	0	0	0	0	0	0	0	2	0	0	15	0	0	0
OTU_334	k__Bacteria	p__Cyanobacteria	c__4C0d-2	o__MLE1-12	f__	g__	s__	0	0	0	0	0	0	0	0	0	0	0	15	0	0	0	0	5	0	0	0	0	0	0	0	0	0	0	0	0	0	0	0	0	0	0	0	0
OTU_400	k__Bacteria	p__Tenericutes	c__Mollicutes	o__RF39	f__	g__	s__	0	0	0	0	0	0	0	0	15	0	0	0	0	0	0	0	0	0	0	0	0	0	0	0	0	0	0	0	0	0	0	0	0	0	0	0	0
OTU_433	k__Bacteria	p__Fusobacteria	c__Fusobacteriia	o__Fusobacteriales	f__Fusobacteriaceae	g__Fusobacterium	s__	0	0	0	0	0	0	15	0	0	0	0	0	0	0	0	0	0	0	0	0	0	0	0	0	0	0	0	0	0	0	0	0	0	5	0	0	0
OTU_475	k__Bacteria	p__Spirochaetes	c__Spirochaetes	o__Spirochaetales	f__Spirochaetaceae	g__Treponema	s__	0	0	0	0	0	0	15	0	0	0	0	0	0	0	0	0	0	0	4	0	0	0	0	0	0	0	0	0	1	0	0	0	0	0	0	0	0
OTU_534	k__Bacteria	p__Bacteroidetes	c__[Saprospirae]	o__[Saprospirales]	f__Chitinophagaceae	g__	s__	0	0	0	0	0	0	15	0	0	0	0	0	0	0	0	0	0	0	0	0	0	0	0	0	0	0	0	0	0	0	0	0	0	0	0	0	0
OTU_641	k__Bacteria	p__Bacteroidetes	c__Bacteroidia	o__Bacteroidales	f__Rikenellaceae	g__	s__	0	2	0	5	0	0	7	0	0	0	0	0	0	0	2	0	2	0	0	14	0	3	15	0	8	10	0	0	0	0	0	0	0	0	0	0	0
OTU_223	k__Bacteria	p__Bacteroidetes	c__Bacteroidia	o__Bacteroidales	f__	g__	s__	0	0	0	0	2	1	0	0	1	0	0	4	0	1	5	10	0	1	2	0	0	1	1	0	2	0	0	1	1	0	6	0	1	1	3	0	14
OTU_248	k__Bacteria	p__Firmicutes	c__Bacilli	o__Bacillales	f__Staphylococcaceae	g__Jeotgalicoccus	s__psychrophilus	0	0	0	1	5	14	0	0	0	0	0	0	0	0	0	0	0	0	0	1	0	0	5	0	0	1	0	0	0	0	0	0	0	0	0	5	1
OTU_256	k__Bacteria	p__Cyanobacteria	c__4C0d-2	o__YS2	f__	g__	s__	0	0	0	0	12	2	0	0	0	0	0	0	0	0	0	0	0	0	0	0	0	5	0	0	14	0	0	0	0	0	0	0	0	0	0	0	0
OTU_282	k__Bacteria	p__Bacteroidetes	c__[Saprospirae]	o__[Saprospirales]	f__Chitinophagaceae	g__	s__	0	0	0	0	0	0	0	0	0	0	0	0	0	0	5	4	0	0	2	0	0	0	0	0	0	0	0	0	14	0	0	0	1	0	0	0	0
OTU_322	k__Bacteria	p__Bacteroidetes	c__Bacteroidia	o__Bacteroidales	f__[Paraprevotellaceae]	g__CF231	s__	0	0	0	0	0	0	5	0	0	0	0	0	0	0	0	0	0	0	14	0	0	0	0	0	0	0	0	0	1	0	4	0	0	0	0	0	0
OTU_340	k__Bacteria	p__Firmicutes	c__Bacilli	o__Bacillales	f__Bacillaceae	g__Bacillus	s__	0	0	0	0	4	14	0	0	0	0	0	0	0	0	0	0	0	0	0	0	0	0	0	0	0	0	0	0	0	0	0	0	0	0	0	0	0
OTU_421	k__Bacteria	p__Proteobacteria	c__Betaproteobacteria	o__Burkholderiales	f__Burkholderiaceae	g__Burkholderia	NA	2	2	2	0	2	0	0	0	0	0	1	0	0	0	0	9	2	0	11	0	0	0	0	0	0	0	0	2	14	0	1	1	8	0	0	2	0
OTU_817	k__Bacteria	p__Cyanobacteria	c__Chloroplast	o__Streptophyta	f__	g__	s__	2	14	0	0	0	0	0	0	0	0	4	0	0	0	0	0	0	0	0	0	2	0	0	0	0	0	0	0	1	0	1	0	5	1	0	0	0
OTU_245	k__Bacteria	p__Bacteroidetes	c__Bacteroidia	o__Bacteroidales	f__Rikenellaceae	g__	s__	0	0	0	7	1	0	0	0	0	0	0	0	0	0	0	0	0	0	0	8	0	13	5	0	10	0	0	0	0	0	0	0	0	0	0	0	0
OTU_246	k__Bacteria	p__Proteobacteria	c__Alphaproteobacteria	o__Rickettsiales	f__mitochondria	NA	NA	0	0	0	0	0	0	0	0	0	0	1	0	0	0	0	0	0	0	0	0	1	0	0	0	0	0	0	1	1	0	2	0	13	13	0	0	2
OTU_250	k__Bacteria	p__Firmicutes	c__Clostridia	o__Clostridiales	f__	g__	s__	0	3	6	13	9	1	0	0	0	0	0	0	0	0	0	0	0	0	0	6	0	0	0	0	1	0	0	0	0	0	0	0	0	0	0	0	4
OTU_261	k__Bacteria	p__Bacteroidetes	c__Bacteroidia	o__Bacteroidales	f__Bacteroidaceae	g__Bacteroides	s__	7	9	13	0	0	0	0	0	0	0	0	0	0	0	0	0	0	0	0	0	0	0	0	0	0	0	0	0	0	0	0	0	0	0	0	0	2
OTU_280	k__Bacteria	p__Cyanobacteria	c__4C0d-2	o__YS2	f__	g__	s__	0	0	0	13	4	2	0	0	0	0	0	0	0	0	0	0	0	0	0	3	0	2	2	0	1	5	0	0	0	0	0	0	0	0	0	0	0
OTU_311	k__Bacteria	p__Firmicutes	c__Clostridia	o__Clostridiales	f__Ruminococcaceae	g__	s__	0	0	0	0	0	0	13	0	0	0	0	0	0	0	0	0	0	0	0	0	0	0	0	0	0	0	0	0	0	0	0	0	0	0	0	0	0
OTU_318	k__Bacteria	p__Firmicutes	c__Clostridia	o__Clostridiales	f__Ruminococcaceae	g__	s__	1	3	13	0	0	0	0	0	0	0	0	0	0	0	0	0	0	0	0	0	0	0	1	0	0	0	0	0	0	0	0	0	0	0	0	0	4
OTU_354	k__Bacteria	p__Proteobacteria	c__Gammaproteobacteria	o__Pasteurellales	f__Pasteurellaceae	g__Pasteurella	s__multocida	0	0	0	0	0	0	0	0	13	0	0	0	0	0	0	9	0	0	5	0	0	0	0	0	0	0	0	1	12	0	1	0	0	0	0	0	0
OTU_358	k__Bacteria	p__Cyanobacteria	c__Chloroplast	o__Streptophyta	f__	g__	s__	0	0	0	0	0	0	0	0	0	0	3	0	0	0	0	0	2	0	0	0	3	0	0	0	0	0	0	0	5	0	1	0	13	1	0	0	0
OTU_361	k__Bacteria	p__Firmicutes	c__Clostridia	o__Clostridiales	f__Lachnospiraceae	g__Dorea	s__	0	0	0	0	0	0	13	0	0	0	0	0	0	0	0	0	0	0	0	0	0	0	0	0	0	0	0	0	0	0	0	0	0	0	0	0	0
OTU_377	k__Bacteria	p__Acidobacteria	c__Acidobacteriia	o__Acidobacteriales	f__Koribacteraceae	g__	s__	0	0	0	0	0	0	0	0	13	0	0	0	0	0	0	0	0	0	3	0	0	1	0	0	0	0	0	0	0	0	0	0	0	0	0	0	0
OTU_431	k__Bacteria	p__Proteobacteria	c__Betaproteobacteria	o__Burkholderiales	f__Comamonadaceae	g__	s__	0	0	0	0	0	0	13	0	0	0	0	0	0	0	0	0	0	0	0	0	0	0	0	0	0	0	0	0	0	0	0	0	0	0	0	0	0
OTU_555	k__Bacteria	p__Firmicutes	c__Bacilli	o__Lactobacillales	f__Lactobacillaceae	g__Pediococcus	s__	0	0	0	0	0	0	0	0	0	0	13	0	0	0	0	0	0	0	0	0	1	1	0	0	0	0	0	0	0	0	0	0	0	0	0	0	0
OTU_213	k__Bacteria	p__Firmicutes	c__Clostridia	o__Clostridiales	f__Ruminococcaceae	g__Ruminococcus	s__	0	0	12	3	0	0	0	0	0	0	0	0	0	0	2	5	2	0	0	2	0	2	6	0	7	7	0	0	0	0	0	0	0	0	0	0	11
OTU_221	k__Bacteria	p__Firmicutes	c__Clostridia	o__Clostridiales	f__	g__	s__	0	0	0	12	0	0	0	0	0	0	0	0	0	0	1	0	8	0	1	6	0	0	4	0	0	5	2	0	0	0	0	0	0	0	0	0	0
OTU_226	k__Bacteria	p__Bacteroidetes	c__Sphingobacteriia	o__Sphingobacteriales	f__	g__	s__	0	0	1	0	0	0	0	0	2	0	0	6	2	3	0	12	1	2	0	0	0	1	0	0	0	0	0	2	2	2	4	0	0	0	0	3	2
OTU_270	k__Bacteria	p__Firmicutes	c__Clostridia	o__Clostridiales	f__Ruminococcaceae	g__	s__	0	0	0	12	0	0	0	0	0	0	0	0	0	0	0	0	0	0	0	6	0	4	9	0	4	8	0	0	0	0	0	0	0	0	0	0	0
OTU_284	k__Bacteria	p__Firmicutes	c__Clostridia	o__Clostridiales	f__	g__	s__	0	0	0	1	1	0	0	0	0	0	0	0	0	0	0	0	0	0	3	0	0	0	0	0	0	0	0	0	0	0	0	0	5	0	0	0	12
OTU_324	k__Bacteria	p__Verrucomicrobia	c__Verruco-5	o__LD1-PB3	f__	g__	s__	0	0	0	0	0	0	12	0	0	0	0	0	0	0	0	0	0	0	0	0	0	0	0	0	0	0	0	0	0	0	0	0	0	0	0	0	0
OTU_339	k__Bacteria	p__Firmicutes	c__Clostridia	o__Clostridiales	f__Ruminococcaceae	g__	s__	0	0	0	0	0	0	0	0	7	0	0	0	0	0	0	0	0	0	0	0	0	0	0	0	0	0	0	0	0	0	0	0	2	12	0	0	0
OTU_342	k__Bacteria	p__Proteobacteria	c__Alphaproteobacteria	o__Caulobacterales	f__Caulobacteraceae	g__Brevundimonas	s__diminuta	0	0	0	0	0	0	0	0	0	0	1	12	0	0	0	0	0	0	0	0	0	0	0	0	0	0	0	0	0	0	0	0	0	0	0	0	0
OTU_364	k__Bacteria	p__Bacteroidetes	c__Bacteroidia	o__Bacteroidales	f__Bacteroidaceae	g__5-7N15	s__	0	0	0	0	0	0	7	0	12	0	0	0	0	0	3	0	1	0	0	0	0	0	0	0	0	0	0	0	3	0	0	0	8	0	0	0	0
OTU_369	k__Bacteria	p__Firmicutes	c__Clostridia	o__Clostridiales	f__Peptostreptococcaceae	g__	s__	0	0	0	0	0	0	0	0	12	0	0	0	0	0	0	0	0	0	0	0	0	0	0	0	0	0	0	0	0	0	0	0	0	0	0	0	0
OTU_370	k__Bacteria	p__Tenericutes	c__Mollicutes	o__RF39	f__	g__	s__	0	0	0	0	0	0	0	0	12	0	0	0	0	0	0	0	0	0	0	0	0	0	0	0	0	0	0	0	0	0	0	0	0	0	0	0	0
OTU_419	Unassigned	NA	NA	NA	NA	NA	NA	0	0	0	0	0	0	0	0	0	0	0	0	0	0	12	0	0	0	0	0	0	0	0	0	0	0	0	0	0	0	0	0	0	0	0	0	0
OTU_423	k__Bacteria	p__Firmicutes	c__Clostridia	o__Clostridiales	f__	g__	s__	0	0	0	0	0	0	0	0	0	0	0	0	0	0	0	0	0	0	0	0	0	12	0	0	6	0	0	0	6	0	0	0	9	0	0	0	0
OTU_430	k__Bacteria	p__Bacteroidetes	c__Bacteroidia	o__Bacteroidales	f__Bacteroidaceae	g__	s__	0	0	0	0	0	0	12	0	4	0	0	0	0	0	0	0	0	0	3	0	0	0	0	0	0	0	0	0	0	0	0	2	0	0	0	0	0
OTU_470	k__Bacteria	p__Bacteroidetes	c__Bacteroidia	o__Bacteroidales	f__S24-7	g__	s__	0	0	0	0	0	0	0	0	0	0	0	0	0	0	0	1	12	0	0	0	0	0	0	0	0	0	0	2	7	0	0	1	0	4	0	0	0
OTU_559	k__Bacteria	p__Firmicutes	c__Clostridia	o__Clostridiales	f__	g__	s__	0	0	0	0	0	0	0	0	0	0	0	0	0	0	0	0	0	0	12	0	0	0	0	0	0	0	0	0	0	0	0	0	0	0	0	0	0
OTU_593	k__Bacteria	p__Proteobacteria	c__Alphaproteobacteria	o__Rickettsiales	f__mitochondria	NA	NA	0	0	0	0	0	0	0	0	0	0	3	0	0	0	0	0	0	0	0	0	0	0	0	0	0	0	0	0	1	0	0	0	12	6	0	0	1
OTU_875	k__Bacteria	p__Firmicutes	c__Clostridia	o__Clostridiales	f__	g__	s__	0	0	0	12	0	0	0	0	0	0	0	0	0	0	0	0	0	0	0	6	0	0	0	0	0	0	0	0	0	0	0	1	1	0	0	0	0
OTU_214	k__Bacteria	p__Firmicutes	c__Clostridia	o__Clostridiales	f__	g__	s__	0	0	0	7	0	0	0	0	0	0	0	0	0	0	2	0	11	0	0	8	0	4	8	0	8	4	0	0	0	0	1	0	0	0	0	0	0
OTU_219	k__Bacteria	p__Firmicutes	c__Clostridia	o__Clostridiales	f__Ruminococcaceae	g__Oscillospira	s__	1	4	3	3	0	0	0	0	0	0	0	0	0	0	0	0	0	0	1	8	0	2	11	0	3	10	0	0	0	0	0	0	0	0	0	0	8
OTU_260	k__Bacteria	p__Bacteroidetes	c__Bacteroidia	o__Bacteroidales	f__S24-7	g__	s__	0	0	0	0	0	3	11	0	10	0	0	8	0	0	1	6	2	0	8	0	0	0	1	0	1	0	0	3	4	0	2	2	10	1	0	3	0
OTU_269	k__Bacteria	p__Bacteroidetes	c__Bacteroidia	o__Bacteroidales	f__Rikenellaceae	g__	s__	0	0	0	4	0	0	0	0	0	0	0	0	0	0	0	0	0	0	0	3	11	5	3	0	2	3	0	0	0	0	0	0	0	0	0	0	0
OTU_285	k__Bacteria	p__Cyanobacteria	c__Chloroplast	o__Streptophyta	f__	g__	s__	0	0	0	0	0	0	0	0	0	0	0	0	0	0	0	0	0	0	0	0	3	0	0	0	0	0	0	0	11	0	4	0	2	1	0	0	0
OTU_335	k__Bacteria	p__Proteobacteria	c__Betaproteobacteria	o__Burkholderiales	f__Comamonadaceae	g__Comamonas	s__	0	1	0	0	1	0	0	0	0	0	0	0	0	0	0	0	0	0	0	0	1	1	0	0	2	0	0	0	0	0	7	2	8	11	0	7	1
OTU_336	k__Bacteria	p__Bacteroidetes	c__Bacteroidia	o__Bacteroidales	f__Rikenellaceae	g__	s__	0	0	0	0	0	0	11	0	0	0	0	0	0	0	0	0	0	0	0	0	0	0	0	0	0	0	0	0	6	0	0	0	0	0	0	0	0
OTU_344	k__Bacteria	p__Tenericutes	c__Mollicutes	o__Mycoplasmatales	f__Mycoplasmataceae	g__Ureaplasma	s__	0	0	0	0	0	0	10	0	0	0	0	0	0	0	0	0	0	0	11	0	0	0	0	0	0	0	0	1	0	0	0	0	0	0	0	0	0
OTU_386	k__Bacteria	p__Firmicutes	c__Clostridia	o__Clostridiales	f__	g__	s__	0	0	0	0	0	0	11	0	0	0	0	0	0	0	0	0	0	0	0	0	0	0	0	0	0	0	0	0	0	0	0	0	0	0	0	0	0
OTU_389	k__Bacteria	p__Proteobacteria	c__Gammaproteobacteria	o__[Marinicellales]	f__[Marinicellaceae]	g__	s__	0	0	0	0	0	0	11	0	0	0	0	0	0	0	0	0	0	0	0	0	0	0	0	0	0	0	0	0	0	0	0	0	0	0	0	0	0
OTU_390	k__Bacteria	p__Proteobacteria	c__Gammaproteobacteria	o__Alteromonadales	f__Shewanellaceae	g__Shewanella	s__	0	0	0	0	0	0	0	0	0	0	0	0	0	0	0	0	0	0	0	0	1	0	0	0	0	0	0	0	0	0	0	0	1	11	0	1	0
OTU_394	k__Bacteria	p__Bacteroidetes	c__Bacteroidia	o__Bacteroidales	f__Prevotellaceae	g__Prevotella	s__intermedia	0	0	0	0	0	0	0	0	0	0	0	0	0	0	0	0	0	0	0	0	0	0	0	0	0	0	0	0	0	0	4	0	1	11	0	0	0
OTU_398	k__Bacteria	p__Firmicutes	c__Bacilli	o__Bacillales	f__Planococcaceae	g__Sporosarcina	s__	0	0	0	0	0	11	0	0	0	0	0	0	0	0	0	0	0	0	0	0	0	0	0	0	0	0	0	0	0	0	0	0	0	0	0	0	0
OTU_402	k__Bacteria	p__Chlamydiae	c__Chlamydiia	o__Chlamydiales	f__Rhabdochlamydiaceae	g__Candidatus Rhabdochlamydia	s__	0	0	0	0	0	0	0	0	0	0	0	0	0	0	0	0	0	0	11	0	0	0	0	0	0	0	0	0	0	0	0	0	0	0	0	0	0
OTU_610	k__Bacteria	p__Proteobacteria	c__Betaproteobacteria	o__Neisseriales	f__Neisseriaceae	g__	s__	0	0	0	0	0	0	0	0	0	0	0	0	0	0	0	0	0	0	0	0	0	0	0	0	0	0	0	0	0	0	0	0	0	11	0	0	0
OTU_254	k__Bacteria	p__Firmicutes	c__Clostridia	o__Clostridiales	f__Lachnospiraceae	g__	s__	0	0	0	3	0	0	0	0	0	0	0	0	0	0	0	0	0	0	0	6	0	2	7	0	10	1	0	0	0	0	0	0	0	0	0	0	0
OTU_255	k__Bacteria	p__Firmicutes	c__Clostridia	o__Clostridiales	f__Dehalobacteriaceae	g__Dehalobacterium	s__	0	5	1	0	0	0	0	0	0	0	0	0	0	0	0	0	2	0	2	1	0	5	6	0	2	5	0	0	0	0	0	0	0	0	0	0	10
OTU_257	k__Bacteria	p__Firmicutes	c__Clostridia	o__Clostridiales	f__	g__	s__	0	0	0	0	4	0	0	0	0	0	0	0	0	0	8	7	9	0	0	0	0	0	0	0	2	0	1	10	0	0	0	0	0	0	0	0	0
OTU_258	k__Bacteria	p__Firmicutes	c__Clostridia	o__Clostridiales	f__Lachnospiraceae	g__[Ruminococcus]	s__gnavus	1	1	10	0	0	0	0	0	0	0	0	0	0	0	7	0	0	0	0	0	0	0	0	0	0	0	0	3	0	0	0	0	4	0	0	0	0
OTU_262	k__Bacteria	p__Verrucomicrobia	c__[Spartobacteria]	o__[Chthoniobacterales]	f__[Chthoniobacteraceae]	g__DA101	s__	0	0	0	0	1	0	1	0	1	2	1	0	0	1	1	9	4	1	0	2	1	2	2	0	0	0	0	3	0	0	3	0	3	0	2	0	10
OTU_308	k__Bacteria	p__Proteobacteria	c__Alphaproteobacteria	o__Rhizobiales	f__Hyphomicrobiaceae	g__Rhodoplanes	s__	2	0	0	0	1	0	0	0	0	3	1	3	0	4	1	10	1	2	0	1	1	0	1	0	0	0	0	0	0	0	3	0	0	0	1	1	10
OTU_332	k__Bacteria	p__Firmicutes	c__Clostridia	o__Clostridiales	f__Ruminococcaceae	g__	s__	0	0	0	2	0	0	0	0	0	0	0	0	0	0	0	0	0	0	0	0	0	0	10	0	0	4	0	0	0	0	0	0	0	0	0	0	0
OTU_360	k__Bacteria	p__Firmicutes	c__Clostridia	o__Clostridiales	f__Lachnospiraceae	g__[Ruminococcus]	s__gnavus	0	0	0	0	0	0	0	0	0	0	0	0	0	0	0	0	0	0	0	0	0	0	0	0	0	0	0	0	0	0	3	2	10	0	0	0	0
OTU_373	k__Bacteria	p__Proteobacteria	c__Alphaproteobacteria	o__Sphingomonadales	f__Sphingomonadaceae	g__Sphingobium	s__	0	0	0	0	0	0	0	0	0	0	0	0	0	0	0	0	0	0	0	0	10	0	0	0	0	0	0	0	0	0	0	0	0	0	0	0	0
OTU_381	k__Bacteria	p__Bacteroidetes	c__Bacteroidia	o__Bacteroidales	f__	g__	s__	0	0	0	0	0	0	0	0	0	0	0	0	0	0	0	0	10	0	0	0	0	0	0	0	0	0	0	0	0	0	0	0	0	0	0	0	0
OTU_392	k__Bacteria	p__Firmicutes	c__Clostridia	o__Clostridiales	f__	g__	s__	0	0	0	0	0	0	0	0	0	0	0	0	0	0	0	0	0	0	0	0	0	0	1	0	0	0	0	0	0	0	0	0	0	10	0	0	0
OTU_422	k__Bacteria	p__Bacteroidetes	c__Sphingobacteriia	o__Sphingobacteriales	f__	g__	s__	1	0	0	0	0	0	0	0	0	0	0	0	0	0	0	0	0	0	0	0	0	0	0	0	0	0	0	0	10	0	0	0	0	0	0	0	0
OTU_434	k__Bacteria	p__Verrucomicrobia	c__[Pedosphaerae]	o__[Pedosphaerales]	f__Ellin515	g__	s__	0	0	0	0	0	0	10	0	0	0	0	0	0	0	0	0	0	0	0	0	0	0	0	0	0	0	0	0	0	0	0	0	0	0	0	0	0
OTU_441	k__Bacteria	p__Bacteroidetes	c__Bacteroidia	o__Bacteroidales	f__	g__	s__	0	0	0	0	0	0	0	0	10	0	0	0	0	0	0	0	0	0	0	0	0	0	0	0	0	0	0	0	0	0	0	0	0	0	0	0	0
OTU_443	k__Bacteria	p__Firmicutes	c__Clostridia	o__Clostridiales	f__Lachnospiraceae	g__	s__	0	0	0	0	0	0	0	0	0	0	0	10	0	0	0	0	0	0	0	0	0	0	0	0	0	0	0	0	0	0	0	0	0	0	0	0	0
OTU_472	k__Bacteria	p__Firmicutes	c__Clostridia	o__Clostridiales	f__Lachnospiraceae	g__	s__	0	0	0	0	0	0	10	0	0	0	0	0	0	0	0	0	0	0	0	0	0	0	0	0	0	0	0	0	0	0	0	0	0	0	0	0	0
OTU_476	k__Bacteria	p__Firmicutes	c__Bacilli	o__Lactobacillales	f__Carnobacteriaceae	g__Granulicatella	s__	0	0	0	0	0	4	8	0	0	0	0	0	0	0	0	0	0	0	1	0	0	0	0	0	0	0	0	0	0	0	0	0	0	10	0	0	0
OTU_486	k__Bacteria	p__Firmicutes	c__Clostridia	o__Clostridiales	f__Ruminococcaceae	g__	s__	0	0	0	0	0	0	0	0	0	0	0	0	0	0	0	0	0	0	10	0	0	0	0	0	0	0	0	0	0	0	0	0	3	0	0	0	0
OTU_520	k__Bacteria	p__Verrucomicrobia	c__Opitutae	o__Opitutales	f__Opitutaceae	g__Opitutus	s__	0	0	0	0	0	0	0	0	0	0	0	0	0	0	0	0	0	0	0	0	0	0	0	0	0	0	0	0	10	0	0	0	0	0	0	0	0
OTU_550	k__Bacteria	p__Firmicutes	c__Clostridia	o__Clostridiales	f__	g__	s__	0	0	0	0	10	0	0	0	0	0	0	0	0	0	0	0	0	0	0	0	0	0	0	0	0	0	0	0	0	0	0	0	0	0	0	0	0
OTU_572	k__Bacteria	p__Firmicutes	c__Clostridia	o__Clostridiales	f__Peptostreptococcaceae	g__	s__	0	0	0	0	0	0	0	0	0	0	0	0	0	0	0	0	0	0	5	2	0	0	0	0	0	0	0	1	10	0	0	0	0	0	0	0	0
OTU_597	k__Bacteria	p__Proteobacteria	c__Betaproteobacteria	o__Burkholderiales	f__Oxalobacteraceae	g__Janthinobacterium	s__	0	0	0	0	0	0	0	0	0	0	0	10	0	0	0	0	0	0	0	0	0	0	0	0	0	0	0	0	1	0	0	0	1	0	0	0	0
OTU_662	k__Bacteria	p__Proteobacteria	c__Gammaproteobacteria	o__Pseudomonadales	f__Pseudomonadaceae	g__Pseudomonas	s__	0	0	0	0	0	0	0	0	0	0	0	0	0	0	0	10	0	0	0	0	0	0	0	0	0	0	0	0	0	0	0	0	0	0	0	0	0
OTU_809	k__Bacteria	p__Proteobacteria	c__Gammaproteobacteria	o__Enterobacteriales	f__Enterobacteriaceae	g__Enterobacter	s__	0	2	0	0	0	0	0	0	0	0	0	0	0	0	0	0	0	0	0	0	0	0	0	0	2	0	0	0	0	0	0	7	9	10	0	0	0
OTU_905	k__Bacteria	p__Firmicutes	c__Clostridia	o__Clostridiales	f__Ruminococcaceae	g__	s__	0	0	0	0	0	0	0	0	5	0	0	10	0	0	0	0	0	0	0	0	0	0	0	0	0	0	0	0	0	0	0	0	0	0	0	0	0
OTU_291	k__Bacteria	p__Firmicutes	c__Clostridia	o__Clostridiales	f__Ruminococcaceae	g__Ruminococcus	s__	1	0	0	0	0	7	0	0	0	0	0	0	0	0	0	0	1	0	9	0	0	0	0	0	0	0	0	0	5	0	0	0	0	0	0	0	0
OTU_355	k__Bacteria	p__Firmicutes	c__Clostridia	o__Clostridiales	f__	g__	s__	0	0	0	0	0	0	0	0	0	0	0	0	0	0	0	0	9	0	0	0	0	0	0	0	0	0	0	2	0	0	0	0	0	0	0	0	0
OTU_357	k__Bacteria	p__Firmicutes	c__Clostridia	o__Clostridiales	f__Ruminococcaceae	g__	s__	0	0	0	0	0	0	0	0	0	0	0	0	0	0	0	0	1	0	0	0	0	0	0	0	0	0	0	0	9	0	0	0	0	0	0	0	0
OTU_359	k__Bacteria	p__Cyanobacteria	c__Chloroplast	o__Streptophyta	f__	g__	s__	0	0	0	0	0	0	0	0	0	0	0	0	0	0	0	0	0	0	0	0	1	0	0	0	0	0	0	0	4	0	0	0	9	1	0	1	0
OTU_395	k__Bacteria	p__Verrucomicrobia	c__[Pedosphaerae]	o__[Pedosphaerales]	f__	g__	s__	0	0	0	0	0	0	0	0	0	0	0	0	0	0	0	0	0	0	0	0	0	0	0	0	0	0	0	0	0	0	0	0	0	0	0	9	0
OTU_427	k__Bacteria	p__Proteobacteria	c__Gammaproteobacteria	o__Alteromonadales	f__[Chromatiaceae]	g__Rheinheimera	s__	0	0	0	0	0	0	0	0	0	0	0	0	0	0	0	0	0	0	0	0	0	0	0	0	0	0	0	0	9	0	0	0	0	0	0	0	0
OTU_442	k__Bacteria	p__Firmicutes	c__Clostridia	o__Clostridiales	f__Ruminococcaceae	g__	s__	0	0	0	0	0	0	0	0	9	0	0	0	0	0	0	0	0	0	0	0	0	0	0	0	0	0	0	0	0	0	0	0	0	0	0	0	0
OTU_445	k__Bacteria	p__Firmicutes	c__Clostridia	o__Clostridiales	f__Ruminococcaceae	g__	s__	0	0	0	0	0	0	0	0	0	0	0	0	0	0	0	0	0	0	9	0	0	0	0	0	0	0	0	0	0	0	0	0	0	0	0	0	0
OTU_457	k__Bacteria	p__Firmicutes	c__Clostridia	o__Clostridiales	f__	g__	s__	0	0	0	0	0	0	0	0	0	0	0	0	0	0	0	0	0	0	0	0	0	4	0	0	9	0	0	0	0	0	0	0	0	0	0	0	0
OTU_473	k__Bacteria	p__Proteobacteria	c__Gammaproteobacteria	o__Aeromonadales	f__Succinivibrionaceae	g__Ruminobacter	s__	0	0	0	0	0	0	9	0	0	0	0	0	0	0	0	0	0	0	0	0	0	0	0	0	0	0	0	0	0	0	0	0	0	0	0	0	0
OTU_482	k__Bacteria	p__Bacteroidetes	c__[Saprospirae]	o__[Saprospirales]	f__Chitinophagaceae	g__	s__	0	0	0	0	0	0	0	0	9	0	0	0	0	0	0	0	0	0	0	0	0	0	0	0	0	0	0	0	0	0	1	0	0	0	0	0	0
OTU_508	k__Bacteria	p__Proteobacteria	c__Gammaproteobacteria	o__Xanthomonadales	f__Sinobacteraceae	g__	s__	0	0	0	0	0	0	0	0	0	0	0	0	0	0	1	9	0	0	0	0	0	0	0	0	0	0	0	0	0	0	0	0	0	0	0	0	0
OTU_516	k__Bacteria	p__Bacteroidetes	c__Bacteroidia	o__Bacteroidales	f__	g__	s__	0	0	0	0	0	0	0	0	0	0	0	0	0	0	0	5	9	0	0	0	0	0	0	0	0	0	0	0	0	0	0	0	0	0	0	0	0
OTU_532	k__Bacteria	p__Proteobacteria	c__Gammaproteobacteria	o__Aeromonadales	f__Succinivibrionaceae	g__	s__	0	0	0	0	0	0	9	0	0	0	0	0	0	0	0	0	0	0	0	0	0	0	0	0	0	0	0	0	0	0	0	0	0	0	0	0	0
OTU_556	k__Bacteria	p__Firmicutes	c__Clostridia	o__Clostridiales	f__	g__	s__	0	0	0	0	0	0	0	0	0	0	0	0	0	0	0	0	0	0	9	0	0	0	0	0	0	0	0	0	0	0	0	0	0	0	0	0	0
OTU_587	k__Bacteria	p__Bacteroidetes	c__Bacteroidia	o__Bacteroidales	f__	g__	s__	0	0	0	0	0	0	9	0	0	0	0	0	0	0	0	0	0	0	0	0	0	0	0	0	0	0	0	0	0	0	0	0	0	0	0	0	0
OTU_596	k__Bacteria	p__Firmicutes	c__Clostridia	o__Clostridiales	f__Lachnospiraceae	g__	s__	0	0	0	0	0	0	0	0	0	0	0	0	0	0	0	0	0	0	0	0	0	0	0	0	2	0	0	0	0	0	0	0	9	0	0	0	0
OTU_626	k__Bacteria	p__Firmicutes	c__Bacilli	o__Bacillales	f__	g__	s__	0	0	0	0	1	9	0	0	0	0	0	0	0	0	0	0	0	0	0	0	1	0	0	0	0	0	0	0	0	0	0	0	0	0	0	2	0
OTU_890	k__Bacteria	p__Firmicutes	c__Clostridia	o__Clostridiales	f__	g__	s__	0	0	0	0	1	0	0	0	0	0	0	0	0	0	0	0	0	0	0	0	0	4	0	0	9	0	0	0	0	0	0	0	0	0	0	0	0
OTU_893	k__Bacteria	p__Bacteroidetes	c__Bacteroidia	o__Bacteroidales	f__Bacteroidaceae	g__Bacteroides	s__	0	0	0	0	0	0	0	0	9	0	0	0	0	0	0	0	0	0	0	0	0	0	0	0	0	0	0	0	0	0	0	0	0	0	0	0	0
OTU_294	k__Bacteria	p__Firmicutes	c__Clostridia	o__Clostridiales	f__Lachnospiraceae	g__	s__	0	5	1	0	0	0	0	0	0	0	0	0	0	0	0	0	0	0	0	0	0	7	1	0	8	1	0	0	0	0	0	0	0	0	0	0	0
OTU_296	k__Bacteria	p__Proteobacteria	c__Alphaproteobacteria	o__Rickettsiales	f__mitochondria	NA	NA	0	2	0	0	0	0	0	0	0	0	0	0	0	0	0	0	0	0	0	0	0	0	0	0	0	0	0	0	7	0	2	0	8	4	0	0	0
OTU_299	k__Bacteria	p__Firmicutes	c__Clostridia	o__Clostridiales	f__	g__	s__	0	2	6	2	0	0	0	0	0	0	0	0	0	0	0	0	0	0	0	8	4	1	0	0	0	0	0	0	0	0	0	0	0	0	0	0	1
OTU_301	k__Bacteria	p__Proteobacteria	c__Alphaproteobacteria	o__Rickettsiales	f__mitochondria	NA	NA	0	0	0	0	0	0	1	0	0	0	1	0	0	0	0	0	0	0	0	0	2	0	0	0	0	0	0	0	0	0	1	0	8	1	0	0	2
OTU_310	k__Bacteria	p__Firmicutes	c__Clostridia	o__Clostridiales	f__	g__	s__	0	0	0	0	0	0	8	0	0	0	0	0	0	0	0	0	0	0	7	0	0	0	0	0	0	0	0	1	0	0	0	0	0	0	0	0	0
OTU_315	k__Bacteria	p__Firmicutes	c__Clostridia	o__Clostridiales	f__	g__	s__	0	0	0	5	3	0	0	0	0	0	0	0	0	0	0	0	0	0	0	4	0	8	3	0	6	3	0	0	0	0	1	0	0	0	0	1	0
OTU_329	k__Bacteria	p__Firmicutes	c__Clostridia	o__Clostridiales	f__	g__	s__	0	0	0	2	2	0	0	0	0	0	0	0	0	0	0	0	2	0	0	8	0	0	6	0	0	8	0	0	2	0	0	0	0	0	0	0	0
OTU_331	k__Bacteria	p__Gemmatimonadetes	c__Gemmatimonadetes	o__N1423WL	f__	g__	s__	0	0	0	0	1	0	0	0	0	0	1	3	0	0	0	1	0	1	0	3	4	2	8	0	0	0	0	0	0	0	1	0	0	0	0	0	1
OTU_338	k__Bacteria	p__Proteobacteria	c__Alphaproteobacteria	o__Sphingomonadales	f__Sphingomonadaceae	g__Novosphingobium	s__	0	0	0	0	0	4	0	0	0	0	7	0	0	0	0	0	0	0	0	0	0	1	0	0	0	0	0	0	0	0	3	1	3	6	0	8	0
OTU_356	k__Bacteria	p__Actinobacteria	c__Actinobacteria	o__Actinomycetales	f__Intrasporangiaceae	NA	NA	0	0	0	0	0	0	0	0	1	0	2	1	1	0	0	1	0	1	0	0	0	0	1	0	0	0	0	0	8	0	3	0	0	0	0	1	4
OTU_379	k__Bacteria	p__Actinobacteria	c__Actinobacteria	o__Actinomycetales	f__Intrasporangiaceae	g__	s__	0	0	0	0	0	0	0	0	0	0	0	0	0	0	0	8	0	0	0	0	0	0	3	0	0	0	0	0	0	0	0	0	0	0	0	0	0
OTU_380	k__Bacteria	p__OD1	c__	o__	f__	g__	s__	0	0	0	0	0	0	0	0	0	0	0	0	0	0	0	0	8	0	0	0	0	0	0	0	0	0	0	0	0	0	0	0	0	0	0	0	0
OTU_401	k__Bacteria	p__OP3	c__PBS-25	o__	f__	g__	s__	0	0	0	0	0	0	0	0	0	0	0	0	0	0	0	0	0	0	8	0	0	0	0	0	0	0	0	0	0	0	0	0	0	0	0	0	0
OTU_409	k__Bacteria	p__Bacteroidetes	c__Bacteroidia	o__Bacteroidales	f__S24-7	g__	s__	0	0	0	4	0	0	0	0	0	0	0	0	0	0	0	0	0	0	0	1	5	5	5	0	8	4	0	0	0	0	0	0	0	0	0	0	3
OTU_424	k__Bacteria	p__Proteobacteria	c__Gammaproteobacteria	o__Aeromonadales	f__Succinivibrionaceae	g__Succinivibrio	s__	0	0	0	0	0	0	0	0	0	0	0	0	0	0	0	0	0	0	2	0	0	0	0	0	0	0	0	0	8	0	0	0	0	0	0	0	0
OTU_438	k__Bacteria	p__Firmicutes	c__Clostridia	o__Clostridiales	f__Lachnospiraceae	g__	s__	0	2	8	0	0	0	0	0	0	0	0	0	0	0	0	0	0	0	0	0	0	0	0	0	0	0	0	0	0	0	0	0	0	0	0	0	4
OTU_440	k__Bacteria	p__Firmicutes	c__Clostridia	o__Clostridiales	f__	g__	s__	0	0	1	0	8	0	5	0	0	0	0	0	0	0	0	0	0	0	3	0	0	0	0	0	0	0	0	0	0	0	1	0	6	0	0	0	0
OTU_454	k__Bacteria	p__Cyanobacteria	c__Chloroplast	o__Streptophyta	f__	g__	s__	0	0	0	0	0	0	0	0	0	0	1	0	0	0	0	0	0	0	0	0	1	0	0	0	0	0	0	1	1	0	0	0	8	2	0	0	0
OTU_481	k__Bacteria	p__Proteobacteria	c__Gammaproteobacteria	o__Thiotrichales	f__Piscirickettsiaceae	g__	s__	0	0	0	0	0	0	0	0	8	0	0	0	0	0	0	0	0	0	0	0	0	0	0	0	0	0	0	0	0	0	0	0	0	0	0	0	0
OTU_554	k__Bacteria	p__Bacteroidetes	c__[Saprospirae]	o__[Saprospirales]	f__Chitinophagaceae	g__Segetibacter	s__	0	0	0	0	0	0	0	0	8	0	0	0	0	0	0	0	0	0	0	0	0	0	0	0	0	0	0	0	0	0	0	0	0	0	0	0	0
OTU_571	k__Bacteria	p__Cyanobacteria	c__4C0d-2	o__YS2	f__	g__	s__	0	0	0	0	0	0	0	0	0	0	0	0	0	0	0	0	0	0	0	0	0	0	0	0	0	0	0	0	8	0	0	0	0	0	0	0	0
OTU_907	k__Bacteria	p__Firmicutes	c__Clostridia	o__Clostridiales	f__	g__	s__	0	0	0	0	0	0	0	0	0	0	0	0	0	0	0	0	0	0	8	0	0	0	0	0	0	0	0	0	0	0	0	0	0	0	0	0	0
OTU_218	k__Bacteria	p__Proteobacteria	c__Alphaproteobacteria	o__Sphingomonadales	f__Sphingomonadaceae	g__	s__	0	7	0	1	3	5	0	0	0	0	1	0	0	0	0	2	1	0	0	1	0	3	2	0	0	0	0	0	0	0	2	0	4	3	0	7	3
OTU_300	k__Bacteria	p__Firmicutes	c__Clostridia	o__Clostridiales	f__[Mogibacteriaceae]	g__	s__	0	0	0	7	0	0	0	0	0	0	0	0	0	0	0	0	0	0	1	5	0	1	4	0	1	2	0	0	0	0	0	0	0	0	0	0	0
OTU_302	k__Bacteria	p__Cyanobacteria	c__Chloroplast	o__Streptophyta	f__	g__	s__	0	0	0	0	0	0	0	0	0	0	0	0	0	0	0	0	0	0	0	1	7	0	0	0	0	0	0	0	4	0	0	0	6	6	0	0	1
OTU_320	k__Bacteria	p__Tenericutes	c__Mollicutes	o__Mycoplasmatales	f__Mycoplasmataceae	g__Mycoplasma	s__	0	0	0	0	0	0	2	0	0	0	0	6	0	0	0	7	1	0	0	0	0	0	0	0	1	0	0	0	5	0	2	0	0	0	0	0	0
OTU_347	k__Bacteria	p__Cyanobacteria	c__Chloroplast	o__Streptophyta	f__	g__	s__	0	0	0	0	0	0	0	0	0	0	1	0	0	0	0	0	0	0	0	0	3	0	0	0	0	0	0	0	0	0	0	0	7	4	0	0	0
OTU_368	k__Bacteria	p__Firmicutes	c__Clostridia	o__Clostridiales	f__Lachnospiraceae	g__	s__	0	0	3	0	4	2	0	0	0	0	0	0	0	0	0	0	0	0	0	0	0	1	0	0	7	0	0	0	0	0	0	0	2	0	0	0	2
OTU_375	k__Bacteria	p__Actinobacteria	c__Coriobacteriia	o__Coriobacteriales	f__Coriobacteriaceae	g__Adlercreutzia	s__	0	0	0	0	0	0	0	0	0	0	0	0	0	0	7	0	0	0	0	0	0	3	0	0	0	0	0	0	0	0	0	0	0	0	0	0	0
OTU_376	k__Bacteria	p__Tenericutes	c__Mollicutes	o__RF39	f__	g__	s__	0	0	0	0	0	0	0	0	0	0	0	0	0	0	0	0	0	0	0	0	0	6	0	0	7	0	0	0	0	0	0	0	0	0	0	0	0
OTU_382	k__Bacteria	p__Firmicutes	c__Clostridia	o__Clostridiales	f__Ruminococcaceae	g__Ruminococcus	s__	0	0	0	0	4	0	0	0	0	0	0	0	0	0	0	0	1	0	2	0	0	1	0	0	1	0	1	0	7	0	0	0	0	0	0	0	0
OTU_387	k__Bacteria	p__Proteobacteria	c__Gammaproteobacteria	o__Xanthomonadales	f__Xanthomonadaceae	g__Stenotrophomonas	s__	0	0	0	0	0	0	7	0	0	0	0	0	0	0	0	0	0	0	0	0	0	0	0	0	0	0	0	0	0	0	0	0	0	0	0	0	0
OTU_417	k__Bacteria	p__Acidobacteria	c__Acidobacteriia	o__Acidobacteriales	f__Koribacteraceae	g__Candidatus Koribacter	s__	0	0	0	0	0	0	0	0	0	0	0	0	0	0	7	0	0	0	0	0	0	0	0	0	0	0	0	0	0	0	0	0	0	0	0	0	0
OTU_418	k__Bacteria	p__Firmicutes	c__Bacilli	o__Bacillales	f__Bacillaceae	g__Bacillus	s__	1	0	1	0	1	1	0	0	0	0	3	0	0	0	1	0	0	0	7	0	0	0	0	0	0	0	0	1	0	0	1	2	2	0	0	1	0
OTU_432	k__Bacteria	p__Proteobacteria	c__Betaproteobacteria	o__Burkholderiales	f__Oxalobacteraceae	NA	NA	0	0	0	0	1	1	6	0	0	0	0	4	0	1	1	7	0	1	0	0	1	0	0	0	0	0	0	0	0	0	2	0	2	0	0	0	4
OTU_436	k__Bacteria	p__Actinobacteria	c__Actinobacteria	o__Actinomycetales	f__Actinomycetaceae	g__Actinomyces	s__	0	0	0	0	0	0	0	0	0	0	0	0	0	0	0	0	0	0	0	0	0	0	0	0	0	0	0	0	0	0	0	0	0	7	0	0	0
OTU_458	k__Bacteria	p__Firmicutes	c__Clostridia	o__Clostridiales	f__	g__	s__	0	0	0	0	0	0	0	0	0	0	0	0	0	0	0	5	1	0	0	0	0	4	0	0	7	0	0	0	0	0	0	0	0	0	0	0	0
OTU_464	k__Bacteria	p__Chloroflexi	c__TK10	o__B07_WMSP1	f__FFCH4570	g__	s__	0	0	0	0	0	0	0	0	0	0	0	0	0	0	0	7	0	0	0	0	0	0	0	0	0	0	0	0	0	0	0	0	0	0	0	0	1
OTU_465	k__Bacteria	p__Proteobacteria	c__Alphaproteobacteria	o__Rhizobiales	f__Bradyrhizobiaceae	g__	s__	0	0	0	0	1	0	3	0	0	0	0	1	1	0	1	7	0	0	1	0	0	0	0	0	0	0	0	0	0	0	0	0	1	0	0	2	1
OTU_466	k__Bacteria	p__Bacteroidetes	c__Bacteroidia	o__Bacteroidales	f__Bacteroidaceae	g__5-7N15	s__	0	0	0	0	0	1	4	0	0	0	0	0	0	0	0	6	0	0	7	0	0	0	0	0	0	0	0	0	0	0	0	0	3	0	0	0	0
OTU_474	k__Bacteria	p__Bacteroidetes	c__Bacteroidia	o__Bacteroidales	f__Bacteroidaceae	g__	s__	0	0	0	0	0	0	5	0	7	0	0	0	0	0	0	0	0	0	0	0	0	0	0	0	0	0	0	0	0	0	0	0	0	0	0	0	0
OTU_480	k__Bacteria	p__Firmicutes	c__Clostridia	o__Clostridiales	f__Ruminococcaceae	g__	s__	0	0	0	0	0	0	0	0	0	0	0	0	0	0	0	0	0	0	0	0	0	0	0	0	0	0	0	0	0	0	0	0	0	0	0	0	7
OTU_484	k__Bacteria	p__Proteobacteria	c__Gammaproteobacteria	o__Pseudomonadales	f__Moraxellaceae	g__Moraxella	s__	0	0	0	0	0	0	0	0	0	0	0	0	0	0	0	0	0	0	7	0	0	0	0	0	0	0	0	0	0	0	0	0	0	0	0	0	0
OTU_495	k__Bacteria	p__Cyanobacteria	c__Chloroplast	o__Streptophyta	f__	g__	s__	0	0	0	0	0	0	0	0	0	0	0	0	0	0	0	0	0	0	0	0	2	0	0	0	0	0	0	0	0	0	0	0	5	7	0	1	1
OTU_521	k__Bacteria	p__Cyanobacteria	c__Chloroplast	o__Streptophyta	f__	g__	s__	0	4	0	0	0	0	0	0	0	0	0	0	0	0	0	0	0	0	0	0	0	0	0	0	0	1	1	0	7	0	0	0	7	0	0	1	0
OTU_537	k__Bacteria	p__Firmicutes	c__Clostridia	o__Clostridiales	f__Ruminococcaceae	g__	s__	0	0	0	0	0	0	7	0	0	0	0	0	0	0	0	0	0	0	0	0	0	0	0	0	0	0	0	0	0	0	0	0	0	0	0	0	0
OTU_542	k__Bacteria	p__Proteobacteria	c__Gammaproteobacteria	o__Pseudomonadales	f__Moraxellaceae	g__Acinetobacter	s__	0	0	0	0	0	7	0	0	2	0	0	3	0	0	0	0	0	0	0	0	4	0	0	0	0	0	0	0	0	0	0	0	1	4	0	0	0
OTU_548	k__Bacteria	p__Firmicutes	c__Clostridia	o__Clostridiales	f__Ruminococcaceae	g__	s__	0	0	0	3	0	0	0	0	0	0	0	0	0	0	0	0	0	0	0	0	0	0	3	0	0	7	0	0	0	0	0	0	0	0	0	0	0
OTU_557	k__Bacteria	p__Firmicutes	c__Erysipelotrichi	o__Erysipelotrichales	f__Erysipelotrichaceae	g__RFN20	s__	0	0	0	0	0	0	0	0	0	0	0	0	0	0	0	0	0	0	7	0	0	0	0	0	0	0	0	0	0	0	0	0	0	0	0	0	0
OTU_600	k__Bacteria	p__Actinobacteria	c__Actinobacteria	o__Actinomycetales	f__Corynebacteriaceae	g__Corynebacterium	s__	0	0	0	0	0	0	1	0	0	0	0	0	0	0	0	0	0	0	0	0	0	0	0	0	0	0	0	0	0	0	0	0	7	0	0	0	0
OTU_604	k__Bacteria	p__Firmicutes	c__Clostridia	o__Clostridiales	f__	g__	s__	0	0	0	1	0	0	0	0	0	0	0	0	0	0	0	0	0	0	0	1	0	0	1	0	0	0	0	0	0	0	3	0	0	7	0	0	0
OTU_627	k__Bacteria	p__Proteobacteria	c__Alphaproteobacteria	o__Rhizobiales	f__	g__	s__	0	0	0	0	0	0	0	0	0	0	0	0	0	0	0	0	0	0	0	0	0	0	0	7	0	0	0	0	0	0	0	0	0	0	0	0	0
OTU_629	k__Bacteria	p__Bacteroidetes	c__Bacteroidia	o__Bacteroidales	f__Bacteroidaceae	g__5-7N15	s__	0	0	0	0	0	0	0	0	7	0	0	0	0	0	0	0	0	0	0	0	0	0	0	0	0	0	0	0	2	0	0	0	0	0	0	0	0
OTU_635	k__Bacteria	p__Acidobacteria	c__Acidobacteriia	o__Acidobacteriales	f__Koribacteraceae	g__	s__	0	0	0	0	0	0	0	0	0	0	0	0	0	0	0	0	0	0	7	0	0	0	0	0	0	0	0	0	0	0	0	0	0	0	0	0	0
OTU_650	k__Bacteria	p__Firmicutes	c__Clostridia	o__Clostridiales	f__Lachnospiraceae	g__	s__	0	0	0	0	0	0	0	0	0	0	0	0	0	0	0	0	0	0	0	0	0	7	0	0	6	0	0	0	0	0	0	0	0	0	0	0	0
OTU_752	k__Bacteria	p__Proteobacteria	c__Gammaproteobacteria	o__Xanthomonadales	f__Sinobacteraceae	g__	s__	0	0	0	0	0	0	0	0	0	0	0	0	0	0	0	0	7	0	0	0	0	0	0	0	0	0	0	0	0	0	0	0	0	0	0	0	0
OTU_810	k__Bacteria	p__Bacteroidetes	c__[Saprospirae]	o__[Saprospirales]	f__Chitinophagaceae	g__	s__	0	0	0	0	0	0	7	0	0	0	0	0	0	0	0	0	0	0	0	0	0	0	0	0	0	0	0	0	0	0	0	0	0	0	0	0	0
OTU_811	k__Bacteria	p__Firmicutes	c__Erysipelotrichi	o__Erysipelotrichales	f__Erysipelotrichaceae	g__	s__	0	0	0	0	0	0	7	0	0	0	0	0	0	0	0	0	0	0	0	0	0	0	0	0	0	0	0	0	0	0	0	0	0	0	0	0	0
OTU_837	k__Bacteria	p__Firmicutes	c__Clostridia	o__Clostridiales	f__	g__	s__	0	0	0	0	0	0	0	0	0	0	0	0	0	0	0	0	0	0	0	0	0	0	0	0	0	0	0	0	0	0	2	0	7	0	0	0	0
OTU_892	k__Bacteria	p__Planctomycetes	c__	o__	f__	g__	s__	0	0	0	0	0	0	0	0	7	0	0	0	0	0	0	0	0	0	0	0	0	0	0	0	0	0	0	0	0	0	0	0	0	0	0	0	0
OTU_278	k__Bacteria	p__Firmicutes	c__Clostridia	o__Clostridiales	f__Clostridiaceae	g__	s__	0	0	0	1	0	0	0	0	0	0	0	0	0	0	0	0	0	0	0	3	1	2	5	0	0	6	0	0	0	0	0	0	3	0	0	0	0
OTU_288	k__Bacteria	p__Firmicutes	c__Clostridia	o__Clostridiales	f__Lachnospiraceae	g__	s__	0	0	0	4	0	0	0	0	0	0	0	0	0	0	0	0	0	0	0	2	0	4	6	0	5	5	0	0	0	0	0	0	0	0	0	0	0
OTU_290	k__Bacteria	p__Firmicutes	c__Clostridia	o__Clostridiales	f__Lachnospiraceae	g__	s__	2	0	6	0	0	0	0	0	0	0	0	0	0	0	5	0	3	0	0	0	0	0	0	0	0	0	1	3	0	0	0	0	0	0	0	0	2
OTU_309	k__Bacteria	p__Proteobacteria	c__Alphaproteobacteria	o__Caulobacterales	f__Caulobacteraceae	g__	s__	0	0	0	0	0	0	0	0	6	0	0	0	0	0	0	5	0	0	0	0	0	0	0	0	0	0	0	0	0	0	0	0	0	4	0	0	0
OTU_316	k__Bacteria	p__Firmicutes	c__Clostridia	o__Clostridiales	f__Ruminococcaceae	g__Oscillospira	s__	0	0	0	0	1	0	0	0	0	0	0	0	0	0	0	0	0	0	0	0	2	6	3	0	4	4	0	0	0	0	0	0	0	0	0	0	0
OTU_384	k__Bacteria	p__Proteobacteria	c__Alphaproteobacteria	o__Rickettsiales	f__mitochondria	NA	NA	0	0	0	0	0	0	0	0	0	0	0	0	0	0	0	0	0	0	0	0	0	0	0	0	0	0	0	0	6	0	4	0	4	0	0	0	0
OTU_385	k__Bacteria	p__Firmicutes	c__Clostridia	o__Clostridiales	f__	g__	s__	0	0	0	0	0	0	0	0	0	0	0	0	0	0	0	0	0	0	0	0	0	0	0	0	0	0	0	0	4	0	0	0	6	0	0	0	0
OTU_391	k__Bacteria	p__Cyanobacteria	c__Chloroplast	o__Streptophyta	f__	g__	s__	0	0	0	0	0	0	0	0	0	0	0	0	0	1	0	0	0	0	0	0	1	0	0	0	0	0	0	0	0	0	0	0	6	3	0	0	1
OTU_397	k__Bacteria	p__Firmicutes	c__Clostridia	o__Clostridiales	f__	g__	s__	1	6	5	0	0	0	0	0	0	0	0	0	0	0	0	0	0	0	0	0	0	0	0	0	0	0	0	0	0	0	0	0	0	0	0	2	2
OTU_406	k__Bacteria	p__Firmicutes	c__Clostridia	o__Clostridiales	f__	g__	s__	0	6	4	0	0	0	0	0	0	0	0	0	0	0	0	0	0	0	0	3	1	0	0	0	0	1	0	0	0	0	2	0	0	0	0	0	3
OTU_411	k__Bacteria	p__Tenericutes	c__Mollicutes	o__RF39	f__	g__	s__	0	0	0	0	0	0	0	0	0	0	0	0	0	0	0	0	0	0	0	2	0	6	0	0	4	0	0	0	0	0	0	0	0	0	0	0	0
OTU_435	k__Bacteria	p__Firmicutes	c__Clostridia	o__Clostridiales	f__Ruminococcaceae	g__Oscillospira	s__	0	0	0	0	0	0	6	0	0	0	0	0	0	0	0	0	0	0	0	0	0	0	0	0	0	0	0	0	0	0	0	0	0	0	0	0	0
OTU_451	k__Bacteria	p__Cyanobacteria	c__Chloroplast	o__Streptophyta	f__	g__	s__	0	0	0	0	0	0	0	0	0	0	0	0	0	0	0	0	0	0	0	0	1	0	0	0	0	0	0	0	0	0	0	0	6	2	0	0	2
OTU_469	k__Bacteria	p__Actinobacteria	c__Thermoleophilia	o__Gaiellales	f__Gaiellaceae	g__	s__	0	0	0	0	0	0	0	0	0	0	0	0	0	0	0	0	6	0	0	0	0	0	0	0	0	0	0	0	0	0	0	0	0	0	0	0	0
OTU_477	k__Bacteria	p__Firmicutes	c__Clostridia	o__Clostridiales	f__	g__	s__	0	0	0	0	0	0	6	0	0	0	0	0	0	0	0	0	1	0	0	0	0	0	0	0	0	0	0	0	0	0	0	0	0	0	0	0	0
OTU_485	k__Bacteria	p__Verrucomicrobia	c__[Pedosphaerae]	o__[Pedosphaerales]	f__auto67_4W	g__	s__	0	0	0	0	0	0	0	0	0	0	0	1	0	0	0	3	0	0	6	0	0	0	0	0	0	0	0	0	0	0	0	0	0	0	0	0	1
OTU_498	k__Bacteria	p__Cyanobacteria	c__Chloroplast	o__Streptophyta	f__	g__	s__	0	0	0	0	0	0	0	0	0	0	1	0	0	0	0	0	0	0	0	0	6	0	0	0	0	0	0	0	6	0	1	0	2	4	0	1	0
OTU_515	k__Bacteria	p__Bacteroidetes	c__Bacteroidia	o__Bacteroidales	f__Prevotellaceae	g__Prevotella	s__	0	0	0	0	0	0	0	0	0	0	0	0	0	0	0	0	6	0	0	0	0	0	0	0	0	0	0	0	0	0	0	0	0	0	0	0	0
OTU_524	k__Bacteria	p__Proteobacteria	c__Gammaproteobacteria	o__Alteromonadales	f__211ds20	g__	s__	0	0	0	0	0	0	0	0	0	0	0	0	0	0	0	0	0	0	0	0	0	0	0	0	0	0	0	0	6	0	0	0	0	0	0	0	0
OTU_526	k__Archaea	p__[Parvarchaeota]	c__[Parvarchaea]	o__YLA114	f__	g__	s__	0	0	0	0	0	0	0	0	0	0	0	0	0	0	0	0	0	0	0	0	0	0	0	0	0	0	0	0	6	0	0	0	0	0	0	0	0
OTU_533	k__Bacteria	p__Planctomycetes	c__Planctomycetia	o__Pirellulales	f__Pirellulaceae	g__Pirellula	s__	0	0	0	0	0	0	6	0	0	0	0	0	0	0	0	0	0	0	0	0	0	0	0	0	0	0	0	0	0	0	0	0	0	0	0	0	0
OTU_539	k__Archaea	p__Euryarchaeota	c__Methanomicrobia	o__Methanomicrobiales	f__Methanocorpusculaceae	g__Methanocorpusculum	s__	0	0	0	0	0	0	0	0	0	0	0	0	0	0	0	0	0	0	0	0	0	0	0	0	0	0	0	0	4	0	0	0	6	0	0	0	0
OTU_543	k__Bacteria	p__Fusobacteria	c__Fusobacteriia	o__Fusobacteriales	f__Fusobacteriaceae	g__Fusobacterium	s__	0	0	0	0	0	0	0	0	0	0	0	0	0	0	0	0	0	0	0	0	0	0	0	0	0	0	0	0	1	0	0	0	6	6	0	0	0
OTU_544	k__Bacteria	p__Firmicutes	c__Clostridia	o__Clostridiales	f__Lachnospiraceae	g__	s__	0	0	0	0	0	0	0	0	0	0	0	0	0	0	0	0	0	0	0	0	0	0	0	0	0	0	0	0	0	0	0	0	0	6	0	0	0
OTU_549	k__Bacteria	p__Firmicutes	c__Clostridia	o__Clostridiales	f__	g__	s__	0	0	0	0	6	0	0	0	0	0	0	0	0	0	0	0	0	0	0	0	0	0	0	0	0	0	0	0	0	0	0	0	0	0	0	0	0
OTU_560	k__Bacteria	p__Bacteroidetes	c__Bacteroidia	o__Bacteroidales	f__Rikenellaceae	g__	s__	0	0	0	0	0	0	0	0	0	0	0	0	0	0	0	0	6	0	0	0	0	0	0	0	0	0	0	0	0	0	0	0	0	0	0	0	0
OTU_590	k__Bacteria	p__Chloroflexi	c__Anaerolineae	o__S0208	f__	g__	s__	0	0	0	0	0	0	6	0	0	0	0	0	0	0	0	0	0	0	0	0	0	0	0	0	0	0	0	0	0	0	0	0	0	0	0	0	0
OTU_601	k__Bacteria	p__Firmicutes	c__Clostridia	o__Clostridiales	f__	g__	s__	0	0	0	0	0	0	0	0	0	0	0	0	0	0	0	0	0	0	0	0	0	0	0	0	0	0	0	0	0	0	0	0	6	0	0	0	0
OTU_606	k__Bacteria	p__Bacteroidetes	c__Bacteroidia	o__Bacteroidales	f__Prevotellaceae	g__Prevotella	s__melaninogenica	0	0	0	0	0	0	4	0	0	0	0	0	0	0	0	0	0	0	0	0	0	0	0	0	0	0	0	0	0	0	0	0	0	6	0	0	0
OTU_631	k__Bacteria	p__Firmicutes	c__Bacilli	o__Lactobacillales	f__Streptococcaceae	g__Streptococcus	s__	0	0	0	0	0	0	0	0	6	0	0	0	0	0	0	0	0	0	0	0	0	0	0	0	0	0	0	1	0	0	0	0	3	0	0	0	0
OTU_651	k__Bacteria	p__Tenericutes	c__Mollicutes	o__RF39	f__	g__	s__	0	0	0	0	0	0	0	0	0	0	0	0	0	0	0	0	0	0	0	0	0	6	0	0	3	0	0	0	0	0	0	0	0	0	0	0	0
OTU_667	k__Bacteria	p__Bacteroidetes	c__Bacteroidia	o__Bacteroidales	f__[Paraprevotellaceae]	g__YRC22	s__	0	0	0	0	0	0	0	0	0	0	0	0	0	0	0	6	0	0	0	0	0	0	0	0	0	0	0	0	0	0	0	0	0	0	0	0	0
OTU_679	k__Bacteria	p__Bacteroidetes	c__Bacteroidia	o__Bacteroidales	f__S24-7	g__	s__	0	0	0	6	1	0	0	0	0	0	0	0	0	0	0	0	0	0	0	2	0	4	6	0	1	1	0	0	0	0	0	0	0	0	0	0	0
OTU_712	k__Bacteria	p__Firmicutes	c__Clostridia	o__Clostridiales	f__	g__	s__	0	0	0	0	0	0	0	0	0	0	0	0	0	0	0	0	0	0	0	0	0	0	6	0	0	0	0	0	0	0	0	0	0	0	0	0	0
OTU_742	k__Bacteria	p__Chloroflexi	c__Anaerolineae	o__envOPS12	f__	g__	s__	0	0	0	0	0	1	0	0	0	1	0	2	1	0	0	6	1	0	0	0	0	0	0	0	0	0	0	0	0	0	0	0	0	0	0	0	1
OTU_776	k__Bacteria	p__Cyanobacteria	c__Chloroplast	o__Streptophyta	f__	g__	s__	0	0	0	0	0	0	0	0	0	0	0	0	0	0	0	0	0	0	0	0	1	0	0	0	0	0	0	0	5	0	0	0	6	1	0	0	0
OTU_780	k__Bacteria	p__Proteobacteria	c__Alphaproteobacteria	o__Rickettsiales	f__mitochondria	NA	NA	0	0	0	0	0	0	0	0	0	0	2	0	0	0	0	0	0	0	0	0	1	0	0	0	0	0	0	0	3	0	0	0	6	1	0	0	0
OTU_853	k__Bacteria	p__Fusobacteria	c__Fusobacteriia	o__Fusobacteriales	f__Leptotrichiaceae	g__Leptotrichia	s__	0	0	0	0	0	0	0	0	0	0	0	0	0	0	0	0	0	0	0	0	0	0	0	0	0	0	0	0	0	0	0	0	0	6	0	0	0
OTU_317	k__Bacteria	p__Firmicutes	c__Clostridia	o__Clostridiales	f__Lachnospiraceae	g__	s__	0	1	4	0	0	0	0	0	0	0	0	0	0	0	0	0	0	0	0	0	0	0	3	0	0	2	0	0	5	0	0	0	0	0	0	0	0
OTU_327	k__Bacteria	p__Proteobacteria	c__Gammaproteobacteria	o__Alteromonadales	f__Idiomarinaceae	g__	s__	0	0	0	0	0	0	0	0	0	0	0	0	0	0	0	0	0	0	0	3	1	5	2	0	0	0	0	0	0	0	0	0	0	0	0	0	0
OTU_330	k__Bacteria	p__Firmicutes	c__Clostridia	o__Clostridiales	f__Eubacteriaceae	g__Anaerofustis	s__	0	0	0	5	0	0	0	0	0	0	0	0	0	0	0	0	0	0	0	2	0	3	3	0	2	3	0	0	0	0	0	0	0	0	0	0	0
OTU_345	k__Bacteria	p__Firmicutes	c__Clostridia	o__Clostridiales	f__	g__	s__	0	0	0	1	0	0	0	0	0	0	0	0	0	0	0	0	0	0	0	3	0	1	5	0	0	3	0	0	0	0	0	0	0	0	0	0	0
OTU_349	k__Bacteria	p__Cyanobacteria	c__Chloroplast	o__Streptophyta	f__	g__	s__	0	0	0	0	0	0	0	0	0	0	0	0	0	0	4	0	0	0	0	0	3	0	0	0	0	0	0	0	0	0	0	0	5	5	0	0	1
OTU_372	k__Bacteria	p__Firmicutes	c__Clostridia	o__Clostridiales	f__	g__	s__	0	0	0	0	0	0	0	0	0	0	0	0	0	0	0	0	0	0	0	5	1	1	0	0	1	0	0	0	0	0	0	0	0	0	0	0	0
OTU_374	k__Bacteria	p__Firmicutes	c__Clostridia	o__Clostridiales	f__	g__	s__	0	0	0	1	5	0	0	0	0	0	0	0	0	0	0	0	0	0	5	0	0	2	0	0	3	0	0	0	0	0	2	3	0	0	0	0	0
OTU_383	k__Bacteria	p__Cyanobacteria	c__Chloroplast	o__Streptophyta	f__	g__	s__	0	0	0	0	0	0	0	0	0	0	0	0	0	0	0	0	0	0	0	0	0	0	0	0	0	0	0	0	2	0	0	0	4	5	0	0	1
OTU_405	k__Bacteria	p__Firmicutes	c__Clostridia	o__Clostridiales	f__[Mogibacteriaceae]	g__	s__	0	0	0	5	0	0	0	0	0	0	0	0	0	0	0	0	0	0	0	3	0	1	0	0	5	0	0	0	0	0	0	0	0	0	0	0	0
OTU_413	k__Bacteria	p__Verrucomicrobia	c__[Pedosphaerae]	o__[Pedosphaerales]	f__auto67_4W	g__	s__	0	0	0	0	1	0	0	0	0	0	0	1	1	0	3	4	0	0	1	0	0	1	1	0	0	0	0	0	0	1	5	0	1	0	1	0	3
OTU_426	k__Bacteria	p__Proteobacteria	c__Alphaproteobacteria	o__Sphingomonadales	f__Sphingomonadaceae	g__Sphingomonas	s__	0	0	0	0	0	0	5	0	0	0	0	0	0	0	0	0	0	0	0	0	0	0	0	0	0	0	0	0	2	0	1	0	0	0	0	0	0
OTU_448	k__Bacteria	p__Acidobacteria	c__[Chloracidobacteria]	o__RB41	f__	g__	s__	0	0	0	0	0	0	5	0	0	2	0	0	0	1	1	0	0	2	0	1	0	0	0	0	0	0	0	0	3	0	3	0	0	0	1	0	2
OTU_468	k__Bacteria	p__Proteobacteria	c__Gammaproteobacteria	o__Aeromonadales	f__Succinivibrionaceae	g__	s__	0	0	0	0	0	0	0	0	0	0	0	0	0	0	0	0	5	0	0	0	0	0	0	0	0	0	0	0	2	0	0	0	0	0	0	0	0
OTU_471	k__Bacteria	p__Fusobacteria	c__Fusobacteriia	o__Fusobacteriales	f__Fusobacteriaceae	g__Fusobacterium	s__	0	0	0	0	0	0	0	0	0	0	0	0	0	0	0	0	0	0	0	0	0	0	0	0	0	0	0	0	4	0	0	0	5	3	0	0	0
OTU_500	k__Bacteria	p__Firmicutes	c__Clostridia	o__Clostridiales	f__	g__	s__	0	0	0	0	0	0	0	0	0	0	0	0	0	0	0	0	0	0	0	0	0	5	0	0	1	0	0	0	0	0	0	0	0	0	0	0	0
OTU_514	k__Bacteria	p__Firmicutes	c__Clostridia	o__Clostridiales	f__Clostridiaceae	g__Clostridium	s__	0	0	0	0	0	0	0	0	0	0	0	0	0	0	0	5	0	0	0	0	0	0	0	0	0	0	0	0	0	0	0	0	0	0	0	0	0
OTU_517	k__Bacteria	p__Proteobacteria	c__Gammaproteobacteria	o__	f__	g__	s__	0	0	0	0	0	0	0	0	0	0	0	0	0	0	0	0	5	0	0	0	0	0	0	0	0	0	0	0	0	0	0	0	0	0	0	0	0
OTU_519	k__Bacteria	p__Acidobacteria	c__Acidobacteria-5	o__	f__	g__	s__	0	0	0	0	0	0	0	0	0	0	0	0	0	0	0	0	0	0	0	0	0	0	0	0	0	0	0	5	0	0	0	0	0	0	0	0	0
OTU_523	k__Bacteria	p__Proteobacteria	c__Gammaproteobacteria	o__Aeromonadales	f__Succinivibrionaceae	g__Ruminobacter	s__	0	0	0	0	0	0	0	0	0	0	0	0	0	0	0	0	0	0	0	0	0	0	0	0	0	0	0	0	5	0	0	0	0	0	0	0	0
OTU_527	k__Bacteria	p__Proteobacteria	c__Deltaproteobacteria	o__Myxococcales	f__	g__	s__	0	0	0	0	0	0	0	0	0	0	0	0	0	0	0	0	0	0	0	0	0	0	0	0	0	0	0	0	5	0	0	0	0	0	0	0	0
OTU_530	k__Bacteria	p__Firmicutes	c__Clostridia	o__Clostridiales	f__	g__	s__	0	0	0	0	0	0	0	0	0	0	0	0	0	0	0	5	0	0	0	0	0	0	0	0	0	0	0	0	0	0	4	1	0	0	0	0	0
OTU_553	k__Bacteria	p__Chlamydiae	c__Chlamydiia	o__Chlamydiales	f__Rhabdochlamydiaceae	g__Candidatus Rhabdochlamydia	s__	0	0	0	0	0	0	0	0	5	0	0	0	0	0	0	0	0	0	0	0	0	0	0	0	0	0	0	0	0	0	0	0	0	0	0	0	0
OTU_558	k__Bacteria	p__Firmicutes	c__Clostridia	o__Clostridiales	f__	g__	s__	0	0	0	0	0	0	0	0	0	0	0	0	0	0	0	0	0	0	5	0	0	4	0	0	0	0	0	0	0	0	0	0	0	0	0	0	0
OTU_567	k__Bacteria	p__Cyanobacteria	c__Chloroplast	o__Streptophyta	f__	g__	s__	0	0	0	0	0	0	0	0	0	0	1	0	0	0	0	0	0	0	0	0	4	0	0	0	0	0	0	1	5	0	0	0	5	3	0	5	0
OTU_570	k__Bacteria	p__Firmicutes	c__Clostridia	o__Clostridiales	f__Ruminococcaceae	g__	s__	0	0	0	0	0	0	0	0	0	0	0	0	0	0	0	0	0	0	0	0	0	0	0	0	0	0	0	0	5	0	0	0	0	0	0	0	0
OTU_586	k__Bacteria	p__Proteobacteria	c__Gammaproteobacteria	o__Xanthomonadales	f__Xanthomonadaceae	g__Stenotrophomonas	s__	0	0	0	0	0	0	5	0	0	0	0	0	0	0	0	0	0	0	0	0	0	0	0	0	0	0	0	0	0	0	0	0	0	0	0	0	0
OTU_605	k__Bacteria	p__Firmicutes	c__Clostridia	o__Clostridiales	f__Peptostreptococcaceae	g__Peptostreptococcus	s__	0	0	0	0	0	0	0	0	0	0	0	0	0	0	0	0	0	0	0	0	0	0	0	0	0	0	0	0	0	0	1	0	1	5	0	0	0
OTU_646	k__Bacteria	p__Proteobacteria	c__Alphaproteobacteria	o__Rickettsiales	f__mitochondria	NA	NA	0	2	0	0	0	0	0	0	0	0	0	0	0	0	2	0	0	0	0	0	3	0	0	0	0	0	0	0	5	0	0	0	4	4	0	0	0
OTU_666	k__Bacteria	p__Planctomycetes	c__Planctomycetia	o__Gemmatales	f__Gemmataceae	g__	s__	0	0	0	0	0	0	0	0	0	0	0	0	0	0	0	5	0	0	0	0	0	0	0	0	0	0	0	0	0	0	0	0	0	0	0	0	0
OTU_694	k__Bacteria	p__Firmicutes	c__Bacilli	o__Lactobacillales	f__Lactobacillaceae	g__Lactobacillus	s__reuteri	0	0	0	5	0	0	0	0	0	0	0	0	0	0	0	0	0	0	0	1	3	0	1	0	0	0	0	0	0	0	0	0	0	0	0	0	0
OTU_708	k__Bacteria	p__Firmicutes	c__Erysipelotrichi	o__Erysipelotrichales	f__Erysipelotrichaceae	g__	s__	0	0	0	0	0	0	0	0	0	0	0	0	0	0	0	0	0	0	0	0	0	5	0	0	0	0	0	0	0	0	0	0	0	0	0	0	0
OTU_710	k__Bacteria	p__Firmicutes	c__Clostridia	o__Clostridiales	f__	g__	s__	0	2	5	0	0	0	0	0	0	0	0	0	0	0	0	0	0	0	0	0	0	3	0	0	3	0	0	0	0	0	0	0	0	0	0	0	4
OTU_735	k__Bacteria	p__Acidobacteria	c__Solibacteres	o__Solibacterales	f__Solibacteraceae	g__Candidatus Solibacter	s__	0	0	0	0	0	0	0	0	0	0	0	0	0	0	0	5	0	0	0	0	0	0	0	0	0	0	0	0	0	0	0	0	0	0	0	0	0
OTU_754	k__Bacteria	p__Firmicutes	c__Clostridia	o__Clostridiales	f__	g__	s__	0	2	5	0	0	0	0	0	0	0	0	0	0	0	0	0	3	0	0	0	0	2	3	0	2	3	1	0	0	0	0	0	0	0	0	0	1
OTU_757	k__Bacteria	p__Firmicutes	c__Clostridia	o__Clostridiales	f__Ruminococcaceae	g__	s__	0	0	0	0	0	0	0	0	0	0	0	0	0	0	0	0	5	0	0	0	0	0	0	0	0	0	0	0	0	0	0	0	0	0	0	0	0
OTU_782	k__Bacteria	p__Nitrospirae	c__Nitrospira	o__Nitrospirales	f__4-29	g__	s__	0	0	0	0	0	0	0	0	0	0	0	0	0	0	0	0	0	0	0	0	0	0	0	0	0	0	0	0	5	0	0	0	0	0	0	0	0
OTU_805	k__Bacteria	p__Acidobacteria	c__Acidobacteria-6	o__iii1-15	f__	g__	s__	0	0	0	0	0	0	0	0	0	0	0	0	1	0	0	0	0	0	0	0	0	0	0	0	0	0	0	0	0	0	3	0	5	0	0	0	0
OTU_840	k__Bacteria	p__Actinobacteria	c__Actinobacteria	o__Actinomycetales	f__Actinomycetaceae	g__N09	s__	0	0	0	0	0	0	0	0	0	0	0	0	0	0	0	0	0	0	0	0	0	0	0	0	0	0	0	0	0	0	0	0	0	5	0	0	0
OTU_857	k__Bacteria	p__Actinobacteria	c__Actinobacteria	o__Actinomycetales	f__Micrococcaceae	g__Nesterenkonia	s__	0	0	0	0	0	0	1	0	0	0	0	0	0	0	0	0	0	0	0	0	0	0	0	0	0	0	0	0	0	0	0	0	0	0	0	5	0
OTU_900	k__Bacteria	p__Firmicutes	c__Bacilli	o__Lactobacillales	f__Lactobacillaceae	g__Lactobacillus	s__	0	0	0	0	0	0	0	0	0	0	5	0	0	0	0	0	0	0	0	0	0	0	0	0	0	0	0	0	0	0	0	0	0	0	0	0	0
OTU_909	k__Bacteria	p__Firmicutes	c__Clostridia	o__Clostridiales	f__[Mogibacteriaceae]	g__	s__	0	0	0	0	0	0	0	0	0	0	0	0	0	0	0	0	0	0	5	0	0	0	0	0	0	0	0	0	0	0	0	0	0	0	0	0	0
OTU_911	k__Bacteria	p__Firmicutes	c__Clostridia	o__Clostridiales	f__Ruminococcaceae	g__Oscillospira	s__	0	0	0	0	0	0	0	0	0	0	0	0	0	0	0	0	0	0	5	0	0	0	0	0	0	0	0	0	0	0	0	0	0	0	0	0	0
OTU_913	k__Bacteria	p__Proteobacteria	c__Gammaproteobacteria	o__Alteromonadales	f__Alteromonadaceae	g__	s__	0	0	0	0	0	0	0	0	0	0	0	0	0	0	0	0	0	0	5	0	0	0	0	0	0	0	0	0	0	0	0	0	0	0	0	0	0
OTU_918	k__Bacteria	p__Proteobacteria	c__Deltaproteobacteria	o__Myxococcales	f__	g__	s__	0	0	0	0	0	0	0	0	0	0	0	0	0	0	0	0	0	0	5	0	0	0	0	0	0	0	0	0	0	0	0	0	0	0	0	0	0
OTU_263	k__Bacteria	p__Bacteroidetes	c__Flavobacteriia	o__Flavobacteriales	f__Flavobacteriaceae	g__Flavobacterium	s__	0	0	1	1	0	0	0	0	0	0	0	3	3	1	3	2	0	0	0	0	0	0	0	0	0	1	0	0	0	0	4	0	0	0	0	2	3
OTU_306	k__Bacteria	p__Firmicutes	c__Clostridia	o__Clostridiales	f__Ruminococcaceae	g__	s__	0	0	0	1	0	0	0	0	0	0	0	0	0	0	0	0	0	0	0	4	0	3	3	0	3	1	0	0	0	0	0	0	0	0	0	0	0
OTU_328	k__Bacteria	p__Cyanobacteria	c__Oscillatoriophycideae	o__Chroococcales	f__Cyanobacteriaceae	g__Cyanobacterium	s__	0	0	0	0	0	0	0	0	0	0	0	0	0	0	0	0	0	0	0	3	2	4	3	0	0	0	0	0	0	0	0	0	0	0	0	0	0
OTU_350	k__Bacteria	p__Cyanobacteria	c__Chloroplast	o__Streptophyta	f__	g__	s__	0	0	0	0	0	0	0	0	0	0	2	0	0	0	0	0	0	0	2	0	2	0	0	0	0	0	0	0	2	0	0	0	4	3	0	0	3
OTU_352	k__Bacteria	p__Bacteroidetes	c__Sphingobacteriia	o__Sphingobacteriales	f__	g__	s__	0	0	0	0	0	0	0	0	0	1	0	2	0	1	1	4	0	0	0	0	0	0	0	0	0	0	0	0	0	0	0	0	0	0	0	0	4
OTU_408	k__Bacteria	p__Cyanobacteria	c__Chloroplast	o__Streptophyta	f__	g__	s__	0	0	0	0	0	0	0	0	0	0	1	0	0	0	0	0	0	0	2	0	1	0	0	0	0	0	0	0	0	0	0	0	1	4	0	0	0
OTU_414	k__Bacteria	p__Actinobacteria	c__Actinobacteria	o__Actinomycetales	f__Microbacteriaceae	g__Cryocola	s__	2	0	4	0	1	0	0	0	0	0	0	0	0	0	2	1	0	0	0	0	1	0	0	0	0	0	0	0	2	0	0	0	0	0	0	0	0
OTU_428	k__Bacteria	p__Bacteroidetes	c__Bacteroidia	o__Bacteroidales	f__[Barnesiellaceae]	g__	s__	0	0	0	0	0	0	0	0	0	0	0	0	0	0	0	0	0	0	0	0	0	0	0	0	0	0	0	0	0	0	3	0	4	0	0	0	0
OTU_461	k__Bacteria	p__Bacteroidetes	c__Bacteroidia	o__Bacteroidales	f__	g__	s__	0	0	0	0	0	0	0	0	0	0	0	1	0	0	0	3	0	3	0	0	2	0	3	0	0	0	0	0	1	0	1	0	0	1	0	0	4
OTU_479	k__Bacteria	p__Bacteroidetes	c__Bacteroidia	o__Bacteroidales	f__	g__	s__	0	0	0	0	1	1	0	0	0	0	0	4	1	0	0	1	0	1	0	0	0	1	2	0	0	0	0	0	0	0	1	0	0	0	1	0	3
OTU_487	k__Bacteria	p__Firmicutes	c__Clostridia	o__Clostridiales	f__Lachnospiraceae	g__Anaerostipes	s__	0	0	0	1	0	0	0	0	0	0	0	0	0	0	0	0	0	0	0	4	0	0	0	0	0	0	0	0	0	0	0	0	0	0	0	0	0
OTU_489	k__Bacteria	p__Acidobacteria	c__iii1-8	o__SJA-36	f__	g__	s__	1	1	0	0	0	0	0	0	0	0	0	4	0	0	0	0	0	0	0	1	0	1	0	0	0	0	0	0	1	1	0	0	0	0	0	3	1
OTU_490	k__Bacteria	p__Firmicutes	c__Clostridia	o__Clostridiales	f__	g__	s__	0	0	0	0	0	0	0	0	0	0	0	0	0	0	0	0	0	0	0	4	0	0	0	0	0	0	0	0	0	0	0	0	0	0	0	0	0
OTU_492	k__Bacteria	p__Proteobacteria	c__Betaproteobacteria	o__Ellin6067	f__	g__	s__	0	0	0	0	0	0	0	0	0	0	0	0	0	0	0	0	0	0	0	0	2	0	1	0	0	0	0	0	0	0	4	0	0	0	0	0	3
OTU_511	Unassigned	NA	NA	NA	NA	NA	NA	0	0	0	0	0	0	0	0	0	1	0	1	0	4	0	2	0	0	0	0	0	0	0	0	0	0	0	0	0	0	1	0	0	0	0	0	0
OTU_518	k__Bacteria	p__Proteobacteria	c__Alphaproteobacteria	o__Rhizobiales	f__	g__	s__	0	0	0	0	0	0	0	0	0	0	1	0	0	0	0	0	0	0	0	0	0	0	0	0	0	0	0	4	3	0	0	0	0	0	0	0	0
OTU_522	k__Bacteria	p__Bacteroidetes	c__Bacteroidia	o__Bacteroidales	f__S24-7	g__	s__	0	1	4	1	0	0	0	0	0	0	0	0	0	0	1	0	0	0	2	0	0	0	1	0	1	0	0	0	1	0	0	0	0	0	0	0	2
OTU_525	k__Bacteria	p__Proteobacteria	c__Alphaproteobacteria	o__Rhizobiales	f__Hyphomicrobiaceae	g__Rhodoplanes	s__	0	0	0	0	0	0	0	0	0	0	0	0	0	0	0	0	0	0	0	1	0	0	0	0	0	0	0	0	4	0	0	0	0	0	0	0	0
OTU_528	k__Bacteria	p__Proteobacteria	c__Gammaproteobacteria	o__Pseudomonadales	f__Moraxellaceae	g__	s__	0	0	0	0	0	0	0	0	0	1	0	0	0	0	0	0	0	0	0	0	0	0	0	0	0	0	0	0	0	0	4	0	0	0	0	0	0
OTU_529	k__Bacteria	p__Proteobacteria	c__Deltaproteobacteria	o__Syntrophobacterales	f__Syntrophobacteraceae	g__	s__	0	0	0	0	0	0	0	0	0	0	0	0	0	0	0	0	0	0	0	0	0	0	0	0	0	0	0	0	0	0	4	0	0	0	0	0	0
OTU_531	k__Bacteria	p__Proteobacteria	c__Betaproteobacteria	o__	f__	g__	s__	0	0	0	0	0	0	0	0	0	0	0	0	0	0	0	0	0	0	0	0	0	0	0	0	0	0	0	0	0	0	4	0	0	0	0	0	0
OTU_536	k__Bacteria	p__Verrucomicrobia	c__[Pedosphaerae]	o__[Pedosphaerales]	f__Ellin517	g__	s__	0	0	0	0	0	0	4	0	0	0	0	0	0	0	0	0	0	0	0	0	0	0	0	0	0	0	0	0	0	0	0	0	0	0	0	0	0
OTU_540	k__Bacteria	p__Actinobacteria	c__Actinobacteria	o__Actinomycetales	f__Micromonosporaceae	NA	NA	0	0	0	0	0	0	0	0	0	0	0	0	0	0	0	0	0	0	0	0	0	0	0	0	0	0	0	0	0	0	0	0	4	1	0	0	0
OTU_541	k__Bacteria	p__Actinobacteria	c__Actinobacteria	o__Actinomycetales	f__Micromonosporaceae	NA	NA	0	0	0	0	0	0	0	0	0	0	0	0	0	0	0	0	0	0	0	0	0	0	0	0	0	0	0	0	0	0	0	0	0	4	0	0	0
OTU_546	k__Bacteria	p__Firmicutes	c__Clostridia	o__Clostridiales	f__	g__	s__	0	4	3	0	0	0	0	0	0	0	0	0	0	0	0	0	0	0	0	0	0	0	0	0	0	0	0	0	0	0	0	0	0	0	0	0	0
OTU_551	k__Bacteria	p__Firmicutes	c__Clostridia	o__Clostridiales	f__Ruminococcaceae	g__Oscillospira	s__	0	0	0	0	4	0	0	0	0	0	0	0	0	0	0	0	0	0	0	0	0	0	0	0	1	0	0	0	0	0	0	0	0	0	0	0	0
OTU_552	k__Bacteria	p__Bacteroidetes	c__Sphingobacteriia	o__Sphingobacteriales	f__Sphingobacteriaceae	g__	s__	0	0	0	0	0	4	0	0	0	0	0	0	0	0	0	0	0	0	0	0	0	0	0	0	0	0	0	0	0	0	0	0	0	0	0	0	1
OTU_564	k__Bacteria	p__Acidobacteria	c__Acidobacteria-6	o__iii1-15	f__	g__	s__	0	0	0	0	0	0	0	0	0	0	0	0	0	0	0	0	0	0	0	0	0	0	0	0	0	0	0	4	0	0	0	0	0	0	0	0	0
OTU_569	k__Bacteria	p__Proteobacteria	c__Alphaproteobacteria	o__Rickettsiales	f__mitochondria	NA	NA	0	0	0	0	0	0	0	0	0	0	0	0	0	0	0	0	0	0	0	0	0	0	0	0	0	0	0	0	4	0	0	0	1	0	0	0	0
OTU_575	k__Bacteria	p__Cyanobacteria	c__Chloroplast	o__Streptophyta	f__	g__	s__	0	0	0	0	0	0	0	0	0	0	0	0	0	0	0	0	0	0	0	0	1	0	0	0	0	0	0	0	4	0	0	0	2	1	0	0	0
OTU_585	k__Bacteria	p__Bacteroidetes	c__Sphingobacteriia	o__Sphingobacteriales	f__	g__	s__	0	0	0	0	0	0	4	0	0	0	0	0	0	0	0	0	0	0	0	0	0	0	0	0	0	0	0	0	0	0	0	0	0	0	0	0	0
OTU_589	k__Bacteria	p__Firmicutes	c__Clostridia	o__Clostridiales	f__Ruminococcaceae	g__	s__	0	0	0	0	0	0	4	0	0	0	0	0	0	0	0	0	0	0	0	0	0	0	0	0	0	0	0	0	0	0	0	0	0	0	0	0	0
OTU_599	k__Bacteria	p__Actinobacteria	c__Actinobacteria	o__Actinomycetales	f__Geodermatophilaceae	g__Modestobacter	s__	0	0	0	0	0	0	0	0	0	0	0	0	0	0	0	0	0	0	0	0	0	0	0	0	2	0	0	0	0	0	0	0	4	0	0	0	0
OTU_603	k__Bacteria	p__Proteobacteria	c__Alphaproteobacteria	o__Rhizobiales	f__Brucellaceae	g__Ochrobactrum	s__	0	0	0	0	0	0	0	0	0	0	0	0	0	0	0	0	0	0	0	0	0	0	0	0	0	0	0	0	0	0	0	0	4	0	0	0	0
OTU_609	k__Bacteria	p__Acidobacteria	c__Solibacteres	o__Solibacterales	f__	g__	s__	0	0	0	0	0	0	0	0	0	0	0	0	0	0	0	0	0	0	0	0	0	0	0	0	0	0	0	0	0	0	0	0	0	4	0	0	0
OTU_613	k__Bacteria	p__Firmicutes	c__Clostridia	o__Clostridiales	f__Veillonellaceae	g__Veillonella	s__	0	0	0	0	0	0	0	0	0	0	0	0	0	0	0	0	0	0	0	0	0	0	0	0	0	0	0	0	0	0	0	0	0	2	0	4	0
OTU_615	k__Bacteria	p__Proteobacteria	c__Gammaproteobacteria	o__Xanthomonadales	f__Sinobacteraceae	g__	s__	0	0	0	0	0	0	0	0	0	0	0	0	0	0	0	0	0	0	0	0	0	0	0	0	0	0	0	0	0	0	0	0	0	0	0	4	0
OTU_633	k__Bacteria	p__Chloroflexi	c__Anaerolineae	o__Anaerolineales	f__Anaerolinaceae	g__	s__	0	0	0	0	0	0	0	0	0	0	0	4	0	0	0	2	0	0	0	0	0	0	0	0	0	0	0	0	0	0	0	0	0	0	0	0	0
OTU_636	k__Bacteria	p__Verrucomicrobia	c__Verrucomicrobiae	o__Verrucomicrobiales	f__Verrucomicrobiaceae	g__Akkermansia	s__	0	0	0	0	0	0	0	0	0	0	0	0	0	0	0	0	0	0	4	0	0	0	0	0	0	0	0	0	0	0	0	0	0	0	0	0	0
OTU_639	k__Bacteria	p__Proteobacteria	c__Betaproteobacteria	o__Burkholderiales	f__Comamonadaceae	g__	s__	0	0	0	0	0	2	0	0	0	0	0	0	0	0	0	0	0	0	0	1	0	0	0	0	3	0	0	0	0	0	4	0	0	0	0	0	0
OTU_652	k__Bacteria	p__Tenericutes	c__Mollicutes	o__RF39	f__	g__	s__	0	0	0	0	0	0	0	0	0	0	0	0	0	0	0	0	0	0	0	0	0	1	0	0	4	0	0	0	0	0	0	0	0	0	0	0	0
OTU_664	k__Bacteria	p__Verrucomicrobia	c__Verrucomicrobiae	o__Verrucomicrobiales	f__Verrucomicrobiaceae	g__Akkermansia	s__	0	0	0	0	0	0	0	0	0	0	0	0	0	0	0	4	0	0	0	0	0	0	0	0	0	0	1	0	0	0	0	0	0	0	0	0	0
OTU_676	k__Archaea	p__Euryarchaeota	c__Methanomicrobia	o__Methanosarcinales	f__ANME-2D	g__	s__	0	1	0	0	0	0	0	0	0	1	0	3	1	0	1	3	0	0	0	0	0	0	0	0	0	0	0	0	0	0	0	0	0	0	0	0	4
OTU_700	k__Bacteria	p__Firmicutes	c__Erysipelotrichi	o__Erysipelotrichales	f__Erysipelotrichaceae	g__Allobaculum	s__	0	0	0	0	0	0	0	0	0	0	0	0	0	0	0	0	0	0	0	0	4	0	0	0	0	0	0	0	0	0	0	0	0	0	0	0	0
OTU_722	k__Bacteria	p__Bacteroidetes	c__Sphingobacteriia	o__Sphingobacteriales	f__	g__	s__	0	0	0	0	0	0	0	0	0	2	0	0	0	1	0	4	0	0	0	0	0	0	0	0	0	0	0	0	0	0	0	0	0	0	0	0	0
OTU_741	k__Bacteria	p__Firmicutes	c__Clostridia	o__Clostridiales	f__Ruminococcaceae	g__	s__	0	0	0	0	0	0	0	0	0	0	0	0	0	0	0	4	0	0	0	0	0	0	0	0	0	0	0	0	0	0	0	0	0	0	0	0	0
OTU_755	k__Bacteria	p__Planctomycetes	c__Phycisphaerae	o__CCM11a	f__	g__	s__	0	0	0	0	0	0	0	0	0	0	0	0	0	0	0	0	4	0	0	0	0	0	0	0	0	0	0	0	0	0	0	0	0	0	0	0	0
OTU_762	k__Bacteria	p__OD1	c__	o__	f__	g__	s__	0	0	0	0	0	0	0	0	0	0	0	0	0	0	0	0	0	0	0	0	0	0	0	0	0	0	0	4	0	0	0	0	0	0	0	0	0
OTU_773	k__Bacteria	p__Cyanobacteria	c__Chloroplast	o__Streptophyta	f__	g__	s__	0	0	0	0	0	0	0	0	0	0	0	0	0	0	0	0	0	0	0	0	0	0	0	0	0	0	0	0	4	0	0	0	0	0	0	0	0
OTU_779	k__Bacteria	p__Firmicutes	c__Clostridia	o__Clostridiales	f__Ruminococcaceae	g__	s__	0	0	0	0	0	0	0	0	0	0	0	0	0	0	0	0	0	0	0	0	0	0	0	0	0	0	0	0	4	0	0	0	2	0	0	0	0
OTU_786	k__Bacteria	p__Gemmatimonadetes	c__Gemmatimonadetes	o__Ellin5290	f__	g__	s__	0	0	0	0	0	0	0	0	0	0	0	0	0	0	0	0	0	0	0	0	0	0	0	0	0	0	0	0	4	0	0	0	0	0	0	0	0
OTU_788	k__Bacteria	p__Tenericutes	c__Mollicutes	o__Mycoplasmatales	f__Mycoplasmataceae	g__Mycoplasma	s__	0	0	0	0	0	0	4	0	0	0	0	0	0	0	0	0	0	0	0	0	0	0	0	0	0	0	0	0	4	0	0	1	0	0	0	0	0
OTU_815	k__Bacteria	p__Bacteroidetes	c__Bacteroidia	o__Bacteroidales	f__	g__	s__	0	0	0	0	0	0	0	0	0	0	0	0	0	0	0	0	0	0	0	0	0	0	0	0	0	0	0	0	0	0	0	0	4	0	0	0	0
OTU_827	k__Bacteria	p__Proteobacteria	c__Alphaproteobacteria	o__Rickettsiales	f__mitochondria	NA	NA	0	0	0	0	0	0	0	0	0	0	0	0	0	0	0	0	0	0	0	0	0	0	0	0	0	0	0	0	1	0	0	0	4	0	0	0	0
OTU_829	k__Bacteria	p__Proteobacteria	c__Alphaproteobacteria	o__Caulobacterales	f__Caulobacteraceae	g__	s__	0	0	0	0	0	0	0	0	0	0	0	0	0	0	0	0	0	0	0	0	0	0	0	0	0	0	0	0	0	0	0	0	4	0	0	0	0
OTU_839	k__Bacteria	p__Bacteroidetes	c__Bacteroidia	o__Bacteroidales	f__Prevotellaceae	g__Prevotella	s__nanceiensis	0	0	0	0	0	0	0	0	0	0	0	0	0	0	0	0	0	0	0	0	0	0	0	0	0	0	0	0	0	0	0	0	0	4	0	0	0
OTU_841	k__Bacteria	p__Firmicutes	c__Bacilli	o__Bacillales	f__Bacillaceae	g__	s__	0	0	0	0	0	0	0	0	0	0	0	0	0	0	0	0	0	0	0	0	0	0	0	0	0	0	0	0	0	0	0	0	0	4	0	0	0
OTU_845	k__Bacteria	p__Firmicutes	c__Bacilli	o__Bacillales	f__Paenibacillaceae	g__Paenibacillus	s__	0	0	0	0	0	0	0	0	0	0	0	0	0	0	0	0	0	0	0	0	0	0	0	0	0	0	0	0	0	0	0	0	0	4	0	0	0
OTU_846	k__Bacteria	p__Proteobacteria	c__Alphaproteobacteria	o__Rickettsiales	f__mitochondria	NA	NA	0	0	0	0	0	0	0	0	0	0	0	0	0	0	0	0	0	0	0	0	0	0	0	0	0	0	0	0	0	0	0	0	1	4	0	0	0
OTU_847	k__Bacteria	p__Firmicutes	c__Clostridia	o__Clostridiales	f__Ruminococcaceae	g__Oscillospira	s__	0	0	4	1	0	0	0	0	0	0	0	0	0	0	0	0	1	0	0	0	0	0	0	0	0	0	0	0	2	0	0	0	0	4	0	0	0
OTU_854	k__Bacteria	p__Proteobacteria	c__Alphaproteobacteria	o__Sphingomonadales	f__Sphingomonadaceae	g__	s__	0	0	0	0	0	0	0	0	0	0	0	0	0	0	0	0	0	0	0	0	0	0	0	0	0	0	0	0	0	0	0	0	0	0	0	4	0
OTU_886	k__Bacteria	p__Verrucomicrobia	c__[Pedosphaerae]	o__[Pedosphaerales]	f__Ellin517	g__	s__	0	0	0	0	0	4	0	0	0	0	0	0	0	0	0	0	0	0	0	0	0	0	0	0	0	0	0	0	0	0	0	0	0	0	0	0	0
OTU_910	k__Bacteria	p__OP3	c__koll11	o__	f__	g__	s__	0	0	0	0	0	0	0	0	0	0	0	0	0	0	0	0	0	0	4	0	0	0	0	0	0	0	0	0	0	0	0	0	0	0	0	0	0
OTU_912	k__Bacteria	p__Firmicutes	c__Clostridia	o__Clostridiales	f__Lachnospiraceae	g__Dorea	s__	0	0	0	0	0	0	0	0	0	0	0	0	0	0	0	0	0	0	4	0	0	0	0	0	0	0	0	0	2	0	0	0	0	0	0	0	0
OTU_914	k__Bacteria	p__Chloroflexi	c__Anaerolineae	o__SBR1031	f__SJA-101	g__	s__	0	0	0	0	0	0	0	0	0	0	0	0	0	0	0	0	0	0	4	0	0	0	0	0	0	0	0	0	0	0	0	0	0	0	0	0	0
OTU_915	k__Bacteria	p__Firmicutes	c__Clostridia	o__Clostridiales	f__Ruminococcaceae	g__	s__	0	0	0	0	0	0	0	0	0	0	0	0	0	0	0	0	0	0	4	0	0	0	0	0	0	0	0	0	0	0	0	0	0	0	0	0	0
OTU_917	k__Bacteria	p__Firmicutes	c__Clostridia	o__Clostridiales	f__Ruminococcaceae	g__	s__	0	0	0	0	0	0	0	0	0	0	0	0	0	0	0	0	1	0	4	0	0	0	0	0	0	0	0	0	0	0	0	0	0	0	0	0	0
OTU_924	k__Bacteria	p__Chloroflexi	c__Anaerolineae	o__Caldilineales	f__Caldilineaceae	g__	s__	0	0	0	0	0	0	0	0	0	0	0	0	0	0	0	0	0	0	4	0	0	0	0	0	0	0	0	0	0	0	0	0	0	0	0	0	0
OTU_333	k__Bacteria	p__Firmicutes	c__Clostridia	o__Clostridiales	f__Dehalobacteriaceae	g__Dehalobacterium	s__	0	0	0	2	1	0	0	0	0	0	0	0	0	0	0	0	0	0	0	0	1	0	1	0	3	3	0	0	0	0	0	0	0	0	0	0	0
OTU_346	k__Bacteria	p__Acidobacteria	c__Solibacteres	o__Solibacterales	f__Solibacteraceae	g__Candidatus Solibacter	s__	0	0	0	0	1	0	0	0	0	0	1	2	0	0	2	2	0	0	0	0	1	0	0	0	0	0	0	0	0	0	3	0	0	0	0	0	1
OTU_348	k__Bacteria	p__Cyanobacteria	c__Chloroplast	o__Streptophyta	f__	g__	s__	0	1	0	0	0	0	0	0	0	0	0	0	0	0	0	0	0	0	0	0	2	0	0	0	0	0	0	0	0	0	0	0	3	2	0	0	3
OTU_371	k__Bacteria	p__Firmicutes	c__Clostridia	o__Clostridiales	f__Ruminococcaceae	g__	s__	0	0	0	3	0	0	0	0	0	0	0	0	0	0	0	0	0	0	0	2	2	3	0	0	3	0	0	0	0	0	0	0	0	0	0	0	0
OTU_403	k__Bacteria	p__Firmicutes	c__Clostridia	o__Clostridiales	f__Lachnospiraceae	g__[Ruminococcus]	s__gnavus	0	0	0	2	0	0	0	0	0	0	0	0	0	0	0	3	1	0	0	1	0	1	0	0	1	0	0	3	0	0	0	0	0	0	0	0	0
OTU_404	k__Bacteria	p__Bacteroidetes	c__Bacteroidia	o__Bacteroidales	f__[Odoribacteraceae]	g__Odoribacter	s__	0	0	0	3	0	0	0	0	0	0	0	0	0	0	0	0	0	0	0	3	3	0	2	0	0	0	0	0	0	0	0	0	0	0	0	0	0
OTU_420	k__Bacteria	p__Actinobacteria	c__Actinobacteria	o__Actinomycetales	f__Cellulomonadaceae	NA	NA	0	0	0	0	0	1	0	0	2	0	2	0	0	0	0	0	1	0	0	0	0	0	1	0	0	0	0	0	0	0	3	0	0	0	0	2	0
OTU_425	k__Bacteria	p__Proteobacteria	c__Gammaproteobacteria	o__Xanthomonadales	f__Xanthomonadaceae	g__	s__	0	0	0	0	0	1	1	0	0	0	0	0	0	0	0	0	0	0	0	0	0	0	0	0	2	0	0	0	1	0	2	0	3	0	0	1	0
OTU_446	k__Bacteria	p__Proteobacteria	c__Betaproteobacteria	o__SBla14	f__	g__	s__	0	0	0	0	2	0	0	0	0	1	1	3	0	0	0	3	0	0	0	1	1	0	3	0	0	0	0	0	0	0	1	0	0	0	0	0	3
OTU_462	k__Bacteria	p__Nitrospirae	c__Nitrospira	o__Nitrospirales	f__FW	g__4-29	s__	1	0	0	0	0	0	0	0	0	0	0	3	0	2	0	1	0	0	0	1	0	0	0	0	0	0	0	0	1	0	0	0	0	0	0	0	1
OTU_463	k__Bacteria	p__Acidobacteria	c__[Chloracidobacteria]	o__RB41	f__	g__	s__	0	0	0	0	1	0	0	0	0	0	0	0	0	0	1	3	0	0	0	0	0	0	1	0	0	0	0	0	0	0	1	0	0	0	0	0	1
OTU_467	k__Bacteria	p__Bacteroidetes	c__[Saprospirae]	o__[Saprospirales]	f__Chitinophagaceae	g__	s__	0	3	0	0	0	0	0	0	0	0	1	0	0	0	0	1	0	1	0	0	0	0	0	0	0	0	0	0	0	0	1	0	0	0	0	0	2
OTU_478	k__Bacteria	p__Proteobacteria	c__Gammaproteobacteria	o__Xanthomonadales	f__Xanthomonadaceae	g__	s__	0	0	2	0	2	1	1	0	1	0	1	0	0	0	1	0	1	0	1	0	0	0	0	0	1	0	0	0	0	0	0	0	1	3	0	0	0
OTU_488	k__Bacteria	p__Fusobacteria	c__Fusobacteriia	o__Fusobacteriales	f__Fusobacteriaceae	g__Fusobacterium	s__	0	0	0	0	0	0	0	0	0	0	0	0	0	0	0	0	0	0	0	1	2	0	0	0	0	0	0	0	1	0	3	0	2	2	0	0	0
OTU_491	k__Bacteria	p__Firmicutes	c__Clostridia	o__Clostridiales	f__Lachnospiraceae	g__	s__	0	0	0	1	1	0	0	0	0	0	0	0	0	0	0	0	0	0	0	3	0	0	0	0	2	0	0	0	0	0	0	0	0	0	0	0	0
OTU_493	k__Bacteria	p__Proteobacteria	c__Alphaproteobacteria	o__Sphingomonadales	f__Sphingomonadaceae	g__Sphingopyxis	s__	0	0	0	0	0	0	0	0	0	0	0	0	0	0	0	0	0	0	0	0	1	0	0	0	0	0	0	0	0	0	0	0	0	0	0	3	0
OTU_545	k__Bacteria	p__Firmicutes	c__Clostridia	o__Clostridiales	f__	g__	s__	1	2	0	0	0	0	0	0	0	0	0	0	0	0	0	0	0	0	0	0	0	0	0	0	0	0	0	0	0	0	0	0	0	0	0	0	3
OTU_561	k__Bacteria	p__Cyanobacteria	c__Oscillatoriophycideae	o__Oscillatoriales	f__Phormidiaceae	NA	NA	0	0	0	0	0	0	0	0	0	0	0	0	0	0	0	0	3	0	3	0	0	0	0	0	0	0	0	0	0	0	0	0	0	0	0	0	0
OTU_562	k__Bacteria	p__Proteobacteria	c__Gammaproteobacteria	o__Pasteurellales	f__Pasteurellaceae	g__	s__	0	0	0	0	0	0	0	0	0	0	0	0	0	0	0	0	0	0	0	0	0	0	0	0	0	0	0	3	0	0	2	0	0	0	0	0	0
OTU_563	k__Bacteria	p__Proteobacteria	c__	o__	f__	g__	s__	0	0	0	0	0	0	0	0	0	0	0	0	0	0	0	0	0	0	0	0	0	0	0	0	0	0	0	3	0	0	0	0	0	0	0	0	0
OTU_565	k__Bacteria	p__Planctomycetes	c__C6	o__d113	f__	g__	s__	0	0	0	0	0	0	0	0	0	0	0	0	0	0	0	0	0	0	0	0	0	0	0	0	0	0	0	3	0	0	0	0	0	0	0	0	0
OTU_568	k__Bacteria	p__Actinobacteria	c__Thermoleophilia	o__Gaiellales	f__Gaiellaceae	g__	s__	0	0	0	0	0	0	0	0	0	0	0	0	0	0	0	0	0	0	0	0	0	0	1	0	0	0	0	0	3	0	0	0	0	0	0	0	0
OTU_573	k__Bacteria	p__WS3	c__PRR-12	o__Sediment-1	f__	g__	s__	0	0	0	0	0	0	0	0	0	0	0	0	0	0	0	0	0	0	0	0	0	0	0	0	0	0	0	0	3	0	0	0	0	0	0	0	0
OTU_574	k__Bacteria	p__Proteobacteria	c__Alphaproteobacteria	o__Rickettsiales	f__mitochondria	NA	NA	0	0	0	0	0	0	0	0	0	0	0	0	0	0	0	0	0	0	0	0	0	0	0	0	0	0	0	0	3	0	0	0	0	1	0	0	0
OTU_579	k__Bacteria	p__Firmicutes	c__Clostridia	o__Clostridiales	f__Ruminococcaceae	g__	s__	0	0	0	0	0	0	0	0	0	0	0	0	0	0	0	0	0	0	0	0	0	0	0	0	0	0	0	0	0	0	3	0	0	0	0	0	0
OTU_580	k__Bacteria	p__Acidobacteria	c__Acidobacteria-6	o__CCU21	f__	g__	s__	0	0	0	0	0	0	0	0	0	0	0	0	0	0	0	0	0	0	0	0	0	0	0	0	0	0	0	0	0	0	3	0	0	0	0	0	0
OTU_581	k__Bacteria	p__Acidobacteria	c__Acidobacteriia	o__Acidobacteriales	f__Koribacteraceae	g__Candidatus Koribacter	s__	0	0	0	0	0	0	0	0	0	0	0	0	0	0	0	0	0	0	0	0	0	0	0	0	0	0	0	0	0	0	3	0	0	0	0	0	0
OTU_582	k__Bacteria	p__Acidobacteria	c__Acidobacteriia	o__Acidobacteriales	f__Koribacteraceae	g__	s__	0	0	0	0	0	0	0	0	0	0	0	0	0	0	0	0	0	0	0	0	0	0	0	0	0	0	0	0	0	0	3	0	0	0	0	0	0
OTU_583	k__Bacteria	p__Cyanobacteria	c__Chloroplast	o__Streptophyta	f__	g__	s__	0	0	0	0	0	0	0	0	0	0	0	0	0	0	0	0	0	0	0	0	0	0	0	0	0	0	0	0	0	0	3	0	0	1	0	0	0
OTU_584	k__Bacteria	p__Firmicutes	c__Bacilli	o__Bacillales	f__Paenibacillaceae	g__Paenibacillus	s__	0	0	0	0	0	0	0	0	0	0	0	0	0	0	0	0	0	0	0	0	0	0	0	0	0	0	0	0	0	0	3	0	3	0	0	0	0
OTU_588	k__Bacteria	p__Actinobacteria	c__Actinobacteria	o__Actinomycetales	f__Corynebacteriaceae	g__Corynebacterium	s__durum	0	0	0	0	0	0	3	0	0	0	0	0	0	0	0	0	0	0	0	0	0	0	0	0	0	0	0	0	0	0	0	0	0	2	0	0	0
OTU_591	k__Bacteria	p__Firmicutes	c__Clostridia	o__Clostridiales	f__Ruminococcaceae	g__Oscillospira	s__	0	0	0	0	0	0	0	0	0	0	0	0	0	0	0	0	0	0	0	0	0	0	0	0	0	0	0	0	0	0	0	0	3	0	0	0	0
OTU_594	k__Bacteria	p__Proteobacteria	c__Gammaproteobacteria	o__Vibrionales	f__Pseudoalteromonadaceae	g__Pseudoalteromonas	s__	0	0	0	0	0	0	0	0	0	0	0	0	0	0	0	0	0	0	0	0	0	0	0	0	0	0	0	0	0	0	0	0	3	0	0	0	0
OTU_607	k__Bacteria	p__Firmicutes	c__Clostridia	o__Clostridiales	f__Clostridiaceae	g__Clostridium	s__	0	0	0	0	0	0	0	0	0	0	0	0	0	0	0	0	0	0	0	0	0	0	0	0	0	0	0	0	0	0	0	0	0	3	0	0	0
OTU_608	k__Bacteria	p__Proteobacteria	c__Gammaproteobacteria	o__Xanthomonadales	f__Xanthomonadaceae	g__Xanthomonas	s__	0	0	0	0	0	0	0	0	0	0	0	0	0	0	0	0	0	0	0	0	0	0	0	0	0	0	0	0	0	0	0	0	1	3	0	0	0
OTU_611	k__Bacteria	p__Firmicutes	c__Clostridia	o__Clostridiales	f__	g__	s__	0	0	0	0	0	0	0	0	0	0	0	0	0	0	0	0	1	0	0	0	0	0	0	0	0	0	0	0	0	0	0	0	0	3	0	0	0
OTU_612	k__Bacteria	p__Firmicutes	c__Bacilli	o__Lactobacillales	f__Aerococcaceae	g__	s__	0	0	0	0	0	0	0	0	0	0	0	0	0	0	0	0	0	0	0	0	0	0	0	0	0	0	0	0	0	0	0	0	0	0	0	3	0
OTU_618	k__Bacteria	p__TM7	c__TM7-1	o__	f__	g__	s__	0	0	0	0	0	0	0	0	0	1	0	0	0	0	0	0	0	0	0	0	0	0	0	0	0	0	0	0	0	0	0	0	0	0	0	0	3
OTU_620	k__Bacteria	p__Firmicutes	c__Clostridia	o__Clostridiales	f__Lachnospiraceae	g__	s__	0	0	3	0	0	0	0	0	0	0	0	0	0	0	0	0	0	0	0	0	0	0	1	0	2	0	0	0	0	0	0	0	0	0	0	0	2
OTU_628	k__Bacteria	p__Firmicutes	c__Clostridia	o__Clostridiales	f__	g__	s__	0	0	0	0	0	0	0	0	0	0	0	0	0	0	0	0	0	0	0	0	0	0	0	0	3	0	0	0	0	0	0	0	0	0	0	0	0
OTU_634	k__Bacteria	p__Actinobacteria	c__Thermoleophilia	o__Solirubrobacterales	f__	g__	s__	0	0	0	0	0	0	0	0	0	0	0	0	0	0	0	0	0	0	3	0	0	0	0	0	0	0	0	0	0	0	0	0	0	0	0	0	0
OTU_643	k__Bacteria	p__Firmicutes	c__Clostridia	o__Clostridiales	f__Clostridiaceae	g__	s__	0	0	0	0	0	0	0	0	0	0	0	0	0	0	0	0	0	0	0	1	0	0	3	0	3	1	0	0	0	0	0	0	0	0	0	0	0
OTU_648	k__Bacteria	p__Proteobacteria	c__Alphaproteobacteria	o__Rickettsiales	f__mitochondria	NA	NA	0	0	0	0	0	0	0	0	0	0	0	0	0	0	0	0	0	0	0	0	1	0	0	0	0	0	0	0	0	0	0	0	2	3	0	0	0
OTU_649	k__Bacteria	p__Proteobacteria	c__Alphaproteobacteria	o__Rickettsiales	f__mitochondria	NA	NA	0	0	0	0	0	0	0	0	0	0	0	0	0	0	0	0	0	0	0	0	3	0	0	0	0	0	0	0	2	0	0	0	1	0	0	0	1
OTU_656	k__Bacteria	p__Firmicutes	c__Clostridia	o__Clostridiales	f__	g__	s__	0	0	0	0	0	0	0	0	0	0	0	0	0	0	0	0	0	0	0	0	0	0	3	0	0	2	0	0	0	0	0	0	0	0	0	0	0
OTU_658	k__Bacteria	p__Acidobacteria	c__Acidobacteriia	o__Acidobacteriales	f__Koribacteraceae	g__	s__	0	0	0	0	0	0	0	0	0	0	0	0	0	0	0	2	0	0	0	2	0	1	3	0	0	0	0	0	0	0	1	0	0	0	0	0	1
OTU_660	k__Bacteria	p__Verrucomicrobia	c__[Spartobacteria]	o__[Chthoniobacterales]	f__[Chthoniobacteraceae]	g__DA101	s__	0	0	0	0	0	0	0	0	0	0	0	0	0	0	3	0	0	0	0	0	0	0	0	0	0	0	0	0	0	0	1	0	0	0	0	0	0
OTU_661	k__Bacteria	p__Acidobacteria	c__[Chloracidobacteria]	o__RB41	f__Ellin6075	g__	s__	0	0	0	0	0	0	0	0	0	0	0	0	0	0	3	1	0	0	0	0	0	0	0	0	0	0	0	0	0	0	0	0	0	0	1	1	0
OTU_669	k__Bacteria	p__Verrucomicrobia	c__[Spartobacteria]	o__[Chthoniobacterales]	f__[Chthoniobacteraceae]	g__DA101	s__	0	0	0	0	0	0	0	0	0	0	0	3	0	1	1	3	0	0	0	0	0	1	1	0	0	0	0	0	0	0	1	0	0	0	0	0	2
OTU_672	k__Bacteria	p__Proteobacteria	c__Betaproteobacteria	o__Burkholderiales	f__Oxalobacteraceae	g__	s__	0	0	0	0	0	1	0	0	0	0	0	0	1	0	0	3	0	1	0	0	0	0	0	0	0	0	0	0	0	0	0	0	0	0	0	0	1
OTU_673	k__Bacteria	p__Acidobacteria	c__Acidobacteria-6	o__iii1-15	f__	g__	s__	0	0	0	0	0	0	0	0	0	0	0	1	0	1	0	2	0	1	3	0	0	0	1	0	0	0	0	0	0	0	3	0	0	0	0	0	0
OTU_680	k__Bacteria	p__Proteobacteria	c__Alphaproteobacteria	o__	f__	g__	s__	0	0	0	0	0	0	0	0	0	0	0	0	0	0	0	0	0	0	0	3	0	0	1	0	0	1	0	0	0	0	2	0	0	0	0	0	0
OTU_697	k__Bacteria	p__Proteobacteria	c__Alphaproteobacteria	o__Rickettsiales	f__mitochondria	NA	NA	0	0	0	0	0	0	0	0	0	0	0	0	0	0	0	0	0	0	0	0	3	0	0	0	0	0	0	0	0	0	0	0	0	0	0	0	0
OTU_701	k__Bacteria	p__Firmicutes	c__Clostridia	o__Clostridiales	f__Ruminococcaceae	g__	s__	0	0	0	0	1	0	0	0	0	0	0	0	0	0	0	0	0	0	3	0	1	0	0	0	0	0	0	0	0	0	0	0	0	0	0	1	0
OTU_713	k__Bacteria	p__Acidobacteria	c__iii1-8	o__32-20	f__	g__	s__	0	0	0	0	0	0	0	0	0	0	0	1	0	0	0	2	0	0	0	0	0	0	1	0	0	0	0	0	0	0	0	0	0	0	1	0	3
OTU_729	k__Bacteria	p__Actinobacteria	c__Actinobacteria	o__Actinomycetales	f__ACK-M1	g__	s__	0	0	0	0	0	0	0	0	0	0	0	0	0	0	3	0	0	0	0	0	0	0	0	0	0	0	0	0	0	0	0	0	0	0	0	0	0
OTU_739	k__Bacteria	p__Verrucomicrobia	c__Opitutae	o__Opitutales	f__Opitutaceae	g__	s__	0	0	0	0	0	0	0	0	0	0	0	1	0	0	0	3	0	0	0	0	0	0	0	0	0	0	0	0	0	0	0	0	0	0	0	0	0
OTU_746	Unassigned	NA	NA	NA	NA	NA	NA	0	0	0	0	0	0	0	0	0	0	0	0	0	0	0	3	0	0	0	0	0	0	0	0	0	0	0	0	0	0	0	0	0	0	0	0	0
OTU_748	k__Bacteria	p__Caldiserica	c__WCHB1-03	o__	f__	g__	s__	0	0	0	0	0	0	0	0	0	0	0	0	0	0	0	3	0	0	0	0	0	0	0	0	0	0	0	0	0	0	0	0	0	0	0	0	2
OTU_749	k__Bacteria	p__Bacteroidetes	c__Bacteroidia	o__Bacteroidales	f__	g__	s__	0	0	0	0	0	0	0	0	0	0	0	0	0	0	0	3	0	0	0	1	0	0	0	0	0	0	0	0	0	0	0	0	0	0	0	1	2
OTU_763	k__Bacteria	p__Proteobacteria	c__Deltaproteobacteria	o__Desulfobacterales	f__Desulfobulbaceae	g__	s__	0	0	0	0	0	0	0	0	0	0	0	0	0	0	0	0	0	0	0	0	0	0	0	0	0	0	0	3	0	0	0	0	0	0	0	0	0
OTU_768	k__Bacteria	p__Firmicutes	c__Clostridia	o__Clostridiales	f__	g__	s__	0	0	0	0	0	0	0	0	0	0	0	0	0	0	0	0	0	0	0	0	0	0	0	0	0	0	0	3	0	0	0	0	0	0	0	0	0
OTU_769	k__Bacteria	p__Acidobacteria	c__Acidobacteria-6	o__iii1-15	f__	g__	s__	0	0	0	0	0	0	0	0	0	0	0	0	0	0	0	0	0	0	0	0	0	0	0	0	0	0	0	3	0	0	0	0	0	0	0	0	0
OTU_770	k__Bacteria	p__Bacteroidetes	c__Sphingobacteriia	o__Sphingobacteriales	f__	g__	s__	0	0	0	0	0	0	0	0	0	0	0	0	0	0	0	0	0	0	0	0	0	0	0	0	0	0	0	3	0	0	0	0	0	0	0	0	0
OTU_771	k__Bacteria	p__Firmicutes	c__Clostridia	o__Clostridiales	f__Lachnospiraceae	g__Butyrivibrio	s__	0	0	0	0	0	0	0	0	0	0	0	0	0	0	0	0	0	0	0	0	0	0	0	0	0	0	0	0	3	0	0	0	0	0	0	0	0
OTU_783	k__Bacteria	p__Bacteroidetes	c__Bacteroidia	o__Bacteroidales	f__Prevotellaceae	g__Prevotella	s__	0	0	0	0	0	0	0	0	0	0	0	0	0	0	0	0	0	0	0	0	0	0	0	0	0	0	0	0	3	0	0	0	0	0	0	0	0
OTU_784	k__Bacteria	p__Bacteroidetes	c__Bacteroidia	o__Bacteroidales	f__Prevotellaceae	g__Prevotella	s__	0	0	0	0	0	0	0	0	0	0	0	0	0	0	0	0	0	0	0	0	0	0	0	0	0	0	0	0	3	0	0	0	0	0	0	0	0
OTU_797	k__Bacteria	p__Proteobacteria	c__Gammaproteobacteria	o__Aeromonadales	f__Aeromonadaceae	g__	s__	0	0	0	0	0	0	0	0	0	0	0	0	0	0	0	0	0	0	0	0	0	0	0	0	0	0	0	0	0	0	3	0	0	0	0	0	0
OTU_799	k__Bacteria	p__Acidobacteria	c__[Chloracidobacteria]	o__RB41	f__	g__	s__	0	0	0	0	0	1	0	0	0	0	1	3	0	2	0	0	0	1	0	0	0	0	1	0	0	0	0	0	0	0	2	0	0	0	0	0	0
OTU_808	k__Bacteria	p__Armatimonadetes	c__[Fimbriimonadia]	o__[Fimbriimonadales]	f__	g__	s__	0	0	0	0	0	0	0	0	0	0	0	0	0	0	0	0	0	0	0	0	0	0	0	0	0	0	0	0	0	0	0	3	0	0	0	0	0
OTU_812	k__Bacteria	p__Nitrospirae	c__Nitrospira	o__Nitrospirales	f__0319-6A21	g__	s__	0	0	0	0	0	0	3	0	0	0	0	0	0	0	0	0	0	0	0	1	0	0	0	0	0	0	0	0	0	0	1	0	0	0	0	0	0
OTU_814	k__Bacteria	p__Proteobacteria	c__Alphaproteobacteria	o__Rickettsiales	f__mitochondria	NA	NA	0	0	0	0	0	0	0	0	0	0	0	0	0	0	0	0	0	0	0	0	0	0	0	0	0	0	0	0	0	0	0	0	3	0	0	0	0
OTU_819	k__Bacteria	p__Firmicutes	c__Clostridia	o__Clostridiales	f__Ruminococcaceae	g__Ruminococcus	s__	0	0	0	0	0	0	0	0	0	0	0	0	0	0	0	0	0	0	0	0	0	0	0	0	0	0	0	0	0	0	1	0	3	0	0	0	0
OTU_821	k__Bacteria	p__Firmicutes	c__Clostridia	o__Clostridiales	f__Clostridiaceae	g__	s__	0	0	0	0	0	0	0	0	0	0	0	0	0	0	0	0	0	0	0	0	0	0	0	0	0	0	0	0	0	0	2	0	3	0	0	0	0
OTU_828	k__Bacteria	p__Firmicutes	c__Clostridia	o__Clostridiales	f__Lachnospiraceae	g__	s__	0	0	0	0	0	0	0	0	0	0	0	0	0	0	0	0	0	0	0	0	0	0	0	0	0	0	0	0	0	0	0	0	3	0	0	0	0
OTU_831	k__Bacteria	p__Firmicutes	c__Bacilli	o__Lactobacillales	f__Lactobacillaceae	g__Lactobacillus	s__	0	0	0	0	0	0	0	0	0	0	0	0	0	0	0	0	0	0	0	0	0	0	0	0	0	0	0	0	0	0	0	0	3	0	0	0	0
OTU_832	k__Bacteria	p__Proteobacteria	c__Alphaproteobacteria	o__Rickettsiales	f__mitochondria	NA	NA	0	0	0	0	0	0	0	0	0	0	0	0	0	0	0	0	0	0	0	0	0	0	0	0	0	0	0	0	0	0	0	0	3	0	0	1	0
OTU_833	k__Bacteria	p__Proteobacteria	c__Alphaproteobacteria	o__Sphingomonadales	f__Erythrobacteraceae	g__	s__	0	0	0	0	0	0	0	0	0	0	0	0	0	0	0	0	0	0	0	0	0	0	0	0	0	0	0	0	0	0	0	0	3	0	0	0	0
OTU_838	k__Bacteria	p__Actinobacteria	c__Actinobacteria	o__Actinomycetales	f__Dermacoccaceae	g__Dermacoccus	s__	0	0	0	0	0	0	0	0	0	0	0	0	0	0	0	0	0	0	0	0	0	0	0	0	0	0	0	0	0	0	0	0	3	0	0	0	0
OTU_843	k__Bacteria	p__Proteobacteria	c__Gammaproteobacteria	o__Pseudomonadales	f__Pseudomonadaceae	g__Pseudomonas	s__	0	0	0	0	0	0	0	0	0	0	0	0	0	0	0	0	0	0	0	0	0	0	0	0	0	0	0	0	1	0	0	0	0	3	0	0	0
OTU_844	k__Bacteria	p__Firmicutes	c__Bacilli	o__Bacillales	f__Planococcaceae	NA	NA	0	0	0	0	0	0	0	0	0	0	0	0	0	0	0	0	0	0	0	0	0	0	0	0	0	0	0	0	0	0	0	0	0	3	0	0	0
OTU_851	k__Bacteria	p__Firmicutes	c__Clostridia	o__Clostridiales	f__Peptostreptococcaceae	g__Peptostreptococcus	NA	0	0	0	0	0	0	0	0	0	0	0	0	0	0	0	0	0	0	0	0	0	0	0	0	0	0	0	0	0	0	0	0	0	3	0	0	0
OTU_852	k__Bacteria	p__Cyanobacteria	c__Chloroplast	o__Streptophyta	f__	g__	s__	0	0	0	0	0	0	0	0	0	0	0	0	0	0	2	0	0	0	0	0	0	0	0	0	0	0	0	0	2	0	2	0	0	3	0	0	0
OTU_860	k__Bacteria	p__Proteobacteria	c__Alphaproteobacteria	o__Rhizobiales	f__Hyphomicrobiaceae	g__	s__	0	0	0	0	0	0	0	0	0	0	0	0	0	0	1	0	0	0	0	0	0	0	1	0	0	0	0	0	0	0	0	0	0	0	0	1	3
OTU_869	k__Bacteria	p__Firmicutes	c__Clostridia	o__Clostridiales	f__Ruminococcaceae	g__	s__	1	1	1	3	0	0	0	0	0	0	0	0	0	0	0	0	0	0	0	0	0	0	0	0	0	0	0	0	0	0	0	0	0	0	0	0	0
OTU_876	k__Bacteria	p__Actinobacteria	c__Actinobacteria	o__Actinomycetales	f__Micrococcaceae	g__	s__	0	0	0	3	0	0	0	0	0	0	0	0	0	0	0	0	0	0	0	0	0	0	0	0	0	0	0	0	0	0	0	0	0	0	0	0	0
OTU_879	k__Bacteria	p__Firmicutes	c__Clostridia	o__Clostridiales	f__	g__	s__	0	0	0	0	3	0	0	0	0	0	0	0	0	0	0	0	0	0	0	0	0	0	0	0	0	0	0	0	0	0	0	0	0	0	0	0	0
OTU_882	k__Bacteria	p__Verrucomicrobia	c__[Spartobacteria]	o__[Chthoniobacterales]	f__[Chthoniobacteraceae]	g__	s__	0	0	0	0	0	3	0	0	0	0	0	0	0	0	0	0	0	0	0	0	0	0	0	0	0	0	0	0	0	0	0	0	0	0	0	0	0
OTU_891	k__Bacteria	p__Bacteroidetes	c__Bacteroidia	o__Bacteroidales	f__S24-7	g__	s__	0	0	0	0	0	0	0	0	0	0	0	0	0	0	0	0	0	0	0	0	0	3	0	0	2	0	0	0	0	0	0	0	0	0	0	0	0
OTU_894	k__Bacteria	p__Actinobacteria	c__Actinobacteria	o__Actinomycetales	f__Microbacteriaceae	g__Salinibacterium	s__	0	0	0	0	0	0	0	0	0	2	1	0	0	0	0	0	0	0	2	0	0	0	0	0	0	0	0	0	0	0	3	0	2	0	0	0	0
OTU_897	k__Bacteria	p__Actinobacteria	c__Actinobacteria	o__Actinomycetales	f__Micrococcaceae	g__	s__	0	0	0	0	0	0	0	0	0	0	3	0	0	0	0	0	0	0	0	0	0	0	0	0	0	0	0	0	0	0	0	0	0	0	0	0	0
OTU_919	k__Bacteria	p__Bacteroidetes	c__[Saprospirae]	o__[Saprospirales]	f__Chitinophagaceae	g__	s__	0	0	0	0	0	0	0	0	0	0	0	0	0	0	0	0	0	0	3	0	0	0	0	0	0	0	0	0	0	0	0	0	0	0	0	0	0
OTU_921	k__Bacteria	p__Planctomycetes	c__BD7-11	o__	f__	g__	s__	0	0	0	0	0	0	0	0	0	0	0	0	0	0	0	0	0	0	3	0	0	0	0	0	0	0	0	0	0	0	0	0	0	0	0	0	0
OTU_319	k__Bacteria	p__Firmicutes	c__Bacilli	o__Bacillales	f__Bacillaceae	g__Bacillus	NA	1	1	0	0	1	1	0	0	0	0	0	0	0	0	1	1	1	0	0	0	0	0	0	1	0	2	0	1	0	0	0	1	0	1	0	1	0
OTU_378	k__Bacteria	p__Proteobacteria	c__Deltaproteobacteria	o__MBNT15	f__	g__	s__	0	0	1	0	0	0	0	0	0	0	0	1	0	0	0	0	0	0	0	0	0	0	1	0	0	0	0	0	0	2	0	0	0	0	1	0	2
OTU_407	k__Bacteria	p__Proteobacteria	c__Betaproteobacteria	o__	f__	g__	s__	1	0	1	0	0	0	0	0	0	0	0	1	0	0	1	2	0	0	0	0	2	1	1	0	0	0	0	1	0	0	1	0	0	1	1	1	1
OTU_410	k__Bacteria	p__Firmicutes	c__Clostridia	o__Clostridiales	f__	g__	s__	1	2	1	0	0	0	0	0	0	0	0	0	0	0	0	0	0	0	0	0	0	2	0	0	2	0	0	0	0	0	0	0	0	0	0	0	0
OTU_415	k__Bacteria	p__Proteobacteria	c__Betaproteobacteria	o__Methylophilales	f__Methylophilaceae	g__	s__	0	0	0	0	0	0	0	0	0	1	0	2	0	0	1	1	0	0	0	0	0	0	0	0	0	0	0	0	0	0	0	0	0	0	0	0	2
OTU_416	k__Archaea	p__Euryarchaeota	c__Methanobacteria	o__Methanobacteriales	f__Methanobacteriaceae	g__Methanobacterium	s__	0	0	0	0	0	0	0	0	1	0	0	1	0	1	1	1	0	2	0	0	0	0	0	0	0	0	0	0	0	0	0	0	0	0	2	0	1
OTU_439	k__Bacteria	p__Actinobacteria	c__Coriobacteriia	o__Coriobacteriales	f__Coriobacteriaceae	g__Adlercreutzia	s__	2	2	2	0	0	0	0	0	0	0	0	0	0	0	0	0	0	0	0	0	0	0	0	0	0	0	0	0	0	0	0	0	0	0	0	0	0
OTU_449	k__Bacteria	p__Bacteroidetes	c__Bacteroidia	o__Bacteroidales	f__S24-7	g__	s__	0	0	0	0	0	0	0	0	0	0	0	0	0	0	0	0	0	0	0	0	1	2	0	0	1	0	0	0	1	0	0	0	0	2	0	0	0
OTU_453	k__Bacteria	p__Verrucomicrobia	c__[Pedosphaerae]	o__[Pedosphaerales]	f__auto67_4W	g__	s__	0	0	0	0	0	0	0	0	0	0	0	1	0	0	0	2	0	0	0	0	1	0	0	0	1	0	0	0	1	0	1	0	0	0	1	0	0
OTU_456	k__Bacteria	p__Chloroflexi	c__Anaerolineae	o__A31	f__	g__	s__	0	0	0	0	0	0	0	0	0	0	0	2	0	0	0	0	0	0	0	0	0	2	0	0	0	0	0	0	0	0	0	0	0	0	1	0	2
OTU_494	k__Bacteria	p__Cyanobacteria	c__Chloroplast	o__Streptophyta	f__	g__	s__	0	0	1	0	0	0	0	0	0	0	0	0	0	0	0	0	0	0	0	0	2	0	0	0	0	0	0	0	0	0	0	0	2	0	0	0	1
OTU_505	k__Bacteria	p__Chloroflexi	c__Ellin6529	o__	f__	g__	s__	0	0	0	0	0	0	0	0	0	2	0	0	0	0	1	1	0	0	0	0	0	0	1	0	0	0	0	0	0	0	0	0	0	0	0	0	0
OTU_506	k__Bacteria	p__Proteobacteria	c__Betaproteobacteria	o__	f__	g__	s__	0	0	0	0	0	0	0	0	0	0	0	1	0	1	2	1	0	0	0	0	0	0	1	0	0	0	0	0	0	0	0	0	0	0	0	0	2
OTU_510	k__Bacteria	p__Bacteroidetes	c__Bacteroidia	o__Bacteroidales	f__Porphyromonadaceae	g__Paludibacter	s__	0	1	0	0	0	0	0	0	0	1	0	1	2	0	0	2	1	0	0	0	0	0	1	0	0	0	1	0	1	0	2	0	0	0	1	0	2
OTU_512	k__Bacteria	p__Verrucomicrobia	c__[Pedosphaerae]	o__[Pedosphaerales]	NA	NA	NA	0	0	0	0	0	0	0	0	0	0	0	1	0	1	0	2	0	0	0	0	0	1	0	0	0	0	0	0	0	0	0	0	0	0	0	0	2
OTU_576	k__Bacteria	p__Acidobacteria	c__[Chloracidobacteria]	o__11-24	f__	g__	s__	0	0	0	0	0	0	0	0	0	0	1	1	0	0	0	0	0	0	0	0	0	0	0	0	0	0	0	0	0	1	2	0	0	0	0	0	1
OTU_592	k__Bacteria	p__Actinobacteria	c__Actinobacteria	o__Actinomycetales	f__Nocardiaceae	g__Rhodococcus	s__	0	0	0	0	0	0	0	0	0	0	0	0	0	0	0	0	1	0	0	0	0	0	0	0	0	0	0	0	0	0	0	0	2	0	1	1	0
OTU_595	k__Bacteria	p__Bacteroidetes	c__Bacteroidia	o__Bacteroidales	f__GZKB119	g__	s__	0	0	0	0	0	0	0	0	0	1	0	1	1	0	0	2	0	0	0	0	0	0	0	0	0	0	0	0	0	0	2	0	2	0	1	0	0
OTU_617	k__Bacteria	p__Verrucomicrobia	c__[Methylacidiphilae]	o__S-BQ2-57	f__	g__	s__	0	0	0	0	1	0	0	0	0	0	0	1	0	0	0	1	0	1	0	0	0	0	0	0	0	0	0	0	0	0	0	0	0	0	0	0	2
OTU_644	k__Bacteria	p__Firmicutes	c__Clostridia	o__Clostridiales	f__	g__	s__	0	0	0	2	0	0	0	0	0	0	0	0	0	0	0	0	0	0	0	1	0	0	0	0	0	0	0	0	0	0	0	0	0	0	0	0	0
OTU_645	k__Bacteria	p__Firmicutes	c__Clostridia	o__Clostridiales	f__	g__	s__	0	0	0	0	0	0	0	0	0	0	0	0	0	0	0	0	0	0	2	0	1	0	1	0	0	0	0	0	0	0	1	1	0	0	0	0	0
OTU_653	k__Bacteria	p__Firmicutes	c__Clostridia	o__Clostridiales	f__Lachnospiraceae	g__	s__	0	0	0	0	0	0	1	0	0	0	0	0	0	0	0	0	0	0	0	0	0	0	2	0	0	2	0	0	0	0	0	0	0	0	0	0	0
OTU_668	k__Bacteria	p__Bacteroidetes	c__Bacteroidia	o__Bacteroidales	f__	g__	s__	0	0	1	0	0	0	0	0	0	0	0	2	0	0	0	2	0	0	0	0	1	0	0	0	0	0	0	0	0	0	0	0	1	0	0	0	0
OTU_674	k__Bacteria	p__Proteobacteria	c__Deltaproteobacteria	o__Bdellovibrionales	f__Bacteriovoracaceae	g__	s__	1	0	0	0	0	0	0	0	0	0	0	0	0	0	0	1	0	1	0	0	0	0	1	0	0	0	0	0	0	0	0	0	0	0	0	0	2
OTU_675	k__Archaea	p__Crenarchaeota	c__MCG	o__pGrfC26	f__	g__	s__	0	0	0	0	0	0	0	0	0	0	0	0	0	0	0	2	0	0	0	0	0	0	0	0	0	0	0	0	0	0	0	0	0	0	0	0	1
OTU_682	k__Bacteria	p__Actinobacteria	c__Actinobacteria	o__Actinomycetales	f__	g__	s__	0	0	0	0	0	0	0	0	0	0	0	0	0	0	0	2	0	0	0	1	0	0	0	0	0	0	0	0	0	0	0	0	1	0	0	1	1
OTU_686	k__Bacteria	p__Bacteroidetes	c__Bacteroidia	o__Bacteroidales	f__Bacteroidaceae	g__Bacteroides	s__ovatus	0	0	0	0	0	0	0	0	0	0	0	0	0	0	0	0	0	0	1	2	0	0	0	0	1	0	0	0	0	0	0	0	0	0	0	0	0
OTU_687	k__Bacteria	p__Firmicutes	c__Clostridia	o__Clostridiales	f__	g__	s__	0	0	0	0	0	0	0	0	0	0	0	0	0	0	0	0	1	0	0	2	0	0	0	0	0	0	0	0	0	0	0	0	0	0	0	0	0
OTU_689	k__Bacteria	p__Firmicutes	c__Bacilli	o__Bacillales	f__Paenibacillaceae	g__Paenibacillus	s__	0	0	0	0	0	0	0	0	0	0	0	0	0	0	0	0	0	0	0	0	2	0	0	0	0	0	0	0	0	0	0	0	0	0	0	0	0
OTU_691	k__Bacteria	p__Proteobacteria	c__Betaproteobacteria	o__A21b	f__EB1003	g__	s__	0	0	0	0	0	0	0	0	0	0	0	0	0	0	0	0	0	0	0	0	2	0	1	0	0	0	0	0	0	0	0	0	0	0	0	0	1
OTU_693	k__Bacteria	p__Bacteroidetes	c__Bacteroidia	o__Bacteroidales	f__Porphyromonadaceae	g__Paludibacter	s__	0	0	0	0	0	0	0	0	0	0	0	2	0	0	0	0	0	0	0	0	1	0	0	0	0	0	0	0	0	0	2	0	0	0	0	2	0
OTU_695	k__Bacteria	p__Proteobacteria	c__Alphaproteobacteria	o__Sphingomonadales	f__Sphingomonadaceae	g__Sphingomonas	s__	0	0	0	0	0	0	0	0	0	0	0	0	0	0	0	0	0	0	0	0	1	0	0	2	0	0	0	0	0	0	0	0	0	0	0	0	0
OTU_703	k__Bacteria	p__Cyanobacteria	c__Chloroplast	o__Streptophyta	f__	g__	s__	0	0	0	0	0	0	0	0	0	0	1	0	0	0	0	0	0	0	0	0	2	0	0	0	0	0	0	0	1	0	0	0	0	0	0	0	0
OTU_706	k__Bacteria	p__Firmicutes	c__Bacilli	o__Lactobacillales	f__Lactobacillaceae	g__Lactobacillus	s__	0	0	0	0	0	0	0	0	0	0	0	0	0	0	0	0	0	0	0	0	0	2	0	0	0	0	0	0	0	0	0	0	0	0	0	0	0
OTU_714	k__Bacteria	p__Bacteroidetes	c__Bacteroidia	o__Bacteroidales	f__Rikenellaceae	g__	s__	0	0	0	0	0	0	0	0	0	0	0	0	0	0	0	0	0	0	0	0	0	0	2	0	0	0	0	0	0	0	0	0	0	0	0	0	0
OTU_715	k__Bacteria	p__Bacteroidetes	c__Bacteroidia	o__Bacteroidales	f__S24-7	g__	s__	0	2	0	0	0	0	0	0	0	0	0	0	0	0	0	0	1	0	0	1	0	0	2	0	0	0	0	0	0	0	0	0	0	0	0	0	0
OTU_716	k__Bacteria	p__Proteobacteria	c__Deltaproteobacteria	o__Desulfuromonadales	f__Geobacteraceae	g__Geobacter	s__	0	0	2	0	0	0	0	0	0	0	0	0	0	0	0	0	0	0	0	0	0	0	1	0	0	0	0	0	0	0	0	0	0	0	0	0	0
OTU_718	k__Bacteria	p__Chloroflexi	c__Anaerolineae	o__SJA-15	f__	g__	s__	0	0	0	0	0	0	0	0	0	0	0	0	0	0	0	0	0	0	0	0	0	0	2	0	0	0	0	0	0	0	0	0	0	0	0	0	0
OTU_720	k__Bacteria	p__Proteobacteria	c__Deltaproteobacteria	o__Syntrophobacterales	f__Syntrophobacteraceae	g__Syntrophobacter	s__	0	0	0	0	0	0	0	0	0	0	0	0	0	2	0	0	0	0	0	0	0	0	0	0	0	0	0	0	0	0	0	0	0	0	0	0	0
OTU_721	k__Bacteria	p__Spirochaetes	c__Spirochaetes	o__Spirochaetales	f__Spirochaetaceae	g__Treponema	s__	0	0	0	0	0	0	0	0	0	0	0	0	0	2	0	0	1	0	0	0	0	0	0	0	0	0	0	0	0	0	0	0	0	0	0	0	0
OTU_723	k__Bacteria	p__Proteobacteria	c__Deltaproteobacteria	o__Desulfuromonadales	f__Geobacteraceae	g__Geobacter	s__	0	0	0	0	0	0	0	0	0	0	0	2	0	2	0	0	0	0	0	0	0	0	0	0	0	0	0	0	0	0	0	0	0	0	0	0	0
OTU_724	k__Bacteria	p__Proteobacteria	c__Deltaproteobacteria	o__Myxococcales	f__	g__	s__	0	0	0	0	0	0	0	0	0	0	0	0	0	0	2	0	0	0	0	0	0	0	0	0	0	0	0	0	0	0	0	0	0	0	0	0	0
OTU_727	k__Bacteria	p__WS5	c__	o__	f__	g__	s__	0	0	0	0	0	0	0	0	0	0	0	0	0	0	2	0	0	0	0	0	0	0	0	0	0	0	0	0	0	0	0	0	0	0	0	0	0
OTU_730	k__Bacteria	p__Cyanobacteria	c__Synechococcophycideae	o__Pseudanabaenales	f__Pseudanabaenaceae	g__	s__	0	0	0	0	0	0	0	0	0	0	0	0	0	0	2	0	0	0	0	0	0	0	0	0	0	0	0	0	0	0	0	0	0	0	0	0	0
OTU_731	k__Bacteria	p__Acidobacteria	c__Acidobacteria-6	o__iii1-15	f__	g__	s__	0	0	0	0	0	0	0	0	0	0	1	0	0	0	2	1	0	0	0	0	0	0	0	0	0	0	0	0	1	0	0	0	0	0	0	0	0
OTU_733	k__Bacteria	p__Caldiserica	c__WCHB1-03	o__	f__	g__	s__	0	0	0	0	0	0	1	0	0	0	0	0	0	1	1	0	0	2	0	0	0	0	0	0	0	0	0	0	0	0	0	0	0	0	0	0	1
OTU_734	k__Archaea	p__Euryarchaeota	c__Methanomicrobia	o__Methanosarcinales	f__Methanosaetaceae	g__Methanosaeta	s__	0	0	0	0	0	0	0	0	0	2	0	1	0	0	0	2	0	0	0	0	0	0	0	0	0	0	0	0	0	0	0	0	0	0	1	0	0
OTU_737	k__Bacteria	p__Armatimonadetes	c__SJA-176	o__RB046	f__	g__	s__	0	0	0	0	0	0	0	0	0	0	0	0	0	0	0	2	0	0	0	0	0	0	0	0	0	0	0	0	0	0	0	0	0	0	0	0	0
OTU_738	k__Bacteria	p__Bacteroidetes	c__Flavobacteriia	o__Flavobacteriales	f__Flavobacteriaceae	g__Flavobacterium	s__	0	0	0	0	0	0	0	0	0	0	0	1	0	0	0	2	0	0	0	0	0	1	0	0	0	0	0	0	0	0	0	0	0	0	0	0	2
OTU_740	k__Bacteria	p__Firmicutes	c__Clostridia	o__Clostridiales	f__Ruminococcaceae	g__	s__	0	0	0	0	0	0	0	0	0	0	0	0	0	0	0	2	0	0	0	0	0	0	1	0	0	0	0	0	0	0	0	0	0	0	0	0	0
OTU_745	k__Bacteria	p__Actinobacteria	c__Actinobacteria	o__Actinomycetales	f__Intrasporangiaceae	g__	s__	0	0	0	0	0	0	0	0	0	0	0	0	0	0	0	2	0	0	0	0	0	0	1	0	0	0	0	0	1	0	0	0	0	0	0	0	0
OTU_747	k__Bacteria	p__Bacteroidetes	c__Sphingobacteriia	o__Sphingobacteriales	f__Sphingobacteriaceae	g__Pedobacter	s__cryoconitis	0	0	0	0	0	0	1	0	0	0	0	0	0	0	0	2	0	0	0	0	0	0	0	0	0	0	0	0	0	0	1	0	0	0	0	0	1
OTU_751	k__Bacteria	p__Bacteroidetes	c__Cytophagia	o__Cytophagales	f__Cytophagaceae	g__Dyadobacter	s__	0	0	0	0	0	0	0	0	0	0	0	0	0	0	0	0	2	0	0	0	0	0	0	0	0	0	0	0	0	0	0	0	0	0	0	0	0
OTU_753	k__Bacteria	p__Proteobacteria	c__Alphaproteobacteria	o__Rickettsiales	f__mitochondria	NA	NA	0	0	0	0	0	0	0	0	0	0	0	0	0	0	0	0	1	0	0	0	0	0	0	0	0	0	0	0	2	0	0	0	1	1	0	0	0
OTU_760	k__Bacteria	p__Proteobacteria	c__Deltaproteobacteria	o__Syntrophobacterales	f__Syntrophobacteraceae	g__	s__	0	0	0	0	0	0	0	0	0	0	0	0	0	0	0	0	0	0	0	0	0	0	0	0	0	0	2	0	0	0	0	0	0	0	0	0	0
OTU_764	Unassigned	NA	NA	NA	NA	NA	NA	0	0	0	0	0	0	0	0	0	0	0	0	0	0	0	0	0	0	0	0	0	0	0	0	0	0	0	2	0	0	0	0	0	0	0	0	0
OTU_765	k__Bacteria	p__Bacteroidetes	c__Bacteroidia	o__Bacteroidales	f__	g__	s__	0	0	0	0	0	0	0	0	0	0	0	0	0	0	0	0	0	0	0	0	0	0	0	0	0	0	0	2	0	0	0	0	0	0	0	0	0
OTU_766	k__Bacteria	p__Bacteroidetes	c__[Saprospirae]	o__[Saprospirales]	f__Chitinophagaceae	g__	s__	0	0	0	0	0	0	0	0	0	0	0	0	0	0	0	0	0	0	0	0	0	0	0	0	0	0	0	2	0	0	0	0	0	0	0	0	0
OTU_767	k__Bacteria	p__Planctomycetes	c__Phycisphaerae	o__S-70	f__	g__	s__	0	0	0	0	0	0	0	0	0	0	0	0	0	0	0	0	0	0	0	0	0	0	0	0	0	0	0	2	0	0	0	0	0	0	0	0	0
OTU_774	k__Bacteria	p__Bacteroidetes	c__Bacteroidia	o__Bacteroidales	f__Prevotellaceae	g__Prevotella	s__	0	0	0	0	0	0	0	0	0	0	0	0	0	0	0	0	0	0	0	0	0	0	0	0	0	0	0	0	2	0	0	0	0	0	0	0	0
OTU_775	k__Bacteria	p__Proteobacteria	c__Gammaproteobacteria	o__Vibrionales	f__Vibrionaceae	g__Salinivibrio	s__costicola	0	0	0	0	0	0	0	0	0	0	0	0	0	0	0	0	0	0	0	0	0	0	0	0	0	0	0	0	2	0	0	0	1	0	0	0	0
OTU_777	k__Bacteria	p__Firmicutes	c__Clostridia	o__Clostridiales	f__Lachnospiraceae	g__	s__	0	0	0	0	0	0	0	0	0	0	0	0	0	0	0	0	0	0	0	0	0	0	0	0	0	0	0	0	2	0	0	0	0	0	0	0	0
OTU_778	k__Bacteria	p__Cyanobacteria	c__Chloroplast	o__Streptophyta	f__	g__	s__	0	0	0	0	0	0	0	0	0	0	0	0	0	0	0	0	0	0	0	0	0	0	0	0	0	0	0	0	2	0	0	0	1	1	0	0	0
OTU_787	k__Bacteria	p__Bacteroidetes	c__Bacteroidia	o__Bacteroidales	f__S24-7	g__	s__	0	0	0	0	0	0	0	0	0	0	0	0	0	0	0	0	0	0	0	0	0	0	0	0	0	0	0	0	2	0	1	0	0	0	0	0	0
OTU_791	k__Bacteria	p__Acidobacteria	c__[Chloracidobacteria]	o__RB41	f__Ellin6075	g__	s__	0	0	0	0	0	0	0	0	0	0	0	0	0	1	0	0	0	0	0	0	0	0	0	0	0	0	0	0	2	0	0	0	0	0	0	0	0
OTU_792	k__Bacteria	p__Proteobacteria	c__Gammaproteobacteria	o__Methylococcales	f__Crenotrichaceae	g__Crenothrix	s__	0	0	0	0	0	0	0	0	0	1	0	2	0	1	0	2	0	2	0	0	0	0	1	0	0	0	0	0	0	2	0	0	0	0	1	0	1
OTU_793	k__Bacteria	p__Actinobacteria	c__Thermoleophilia	o__	f__	g__	s__	0	0	0	0	0	0	0	0	0	0	0	0	1	0	0	0	0	0	0	0	0	0	1	0	0	0	0	0	0	2	0	0	0	0	0	0	0
OTU_794	k__Bacteria	p__Verrucomicrobia	c__[Pedosphaerae]	o__[Pedosphaerales]	f__auto67_4W	g__	s__	0	0	0	0	0	0	0	0	0	0	0	0	0	0	0	0	0	0	0	0	0	0	0	0	0	0	0	0	0	2	0	0	0	0	0	0	0
OTU_795	k__Bacteria	p__Acidobacteria	c__[Chloracidobacteria]	o__RB41	f__	g__	s__	0	0	0	1	0	0	0	0	0	0	0	1	1	0	1	1	0	0	0	1	1	0	1	0	0	0	0	0	0	0	2	0	0	0	0	0	0
OTU_796	k__Bacteria	p__Actinobacteria	c__Thermoleophilia	o__Solirubrobacterales	f__Patulibacteraceae	g__	s__	0	0	0	0	0	0	0	0	0	0	0	0	0	0	0	0	0	0	0	0	0	0	0	0	0	0	0	0	0	0	2	0	0	0	0	0	0
OTU_798	k__Bacteria	p__OD1	c__	o__	f__	g__	s__	0	0	0	0	0	0	0	0	0	0	0	0	0	0	0	0	0	0	0	0	0	0	0	0	0	0	0	0	0	0	2	0	0	0	0	0	0
OTU_800	k__Bacteria	p__Firmicutes	c__Clostridia	o__Clostridiales	f__Clostridiaceae	g__Clostridium	s__	0	0	0	0	0	0	0	0	0	0	1	0	0	0	0	0	2	0	0	0	0	0	2	0	0	0	0	0	0	0	1	0	0	0	1	0	0
OTU_801	k__Bacteria	p__Tenericutes	c__Mollicutes	o__Mycoplasmatales	f__Mycoplasmataceae	g__Mycoplasma	s__	0	0	0	0	0	0	0	0	0	0	0	0	0	0	0	0	0	0	0	0	0	0	0	0	0	0	1	0	0	0	2	0	0	0	0	0	0
OTU_802	k__Bacteria	p__Proteobacteria	c__Gammaproteobacteria	o__Xanthomonadales	f__Xanthomonadaceae	g__Stenotrophomonas	s__	0	0	0	0	0	0	0	0	0	0	0	0	0	0	0	0	0	0	0	0	0	0	0	0	0	0	0	0	0	0	2	0	0	0	0	0	0
OTU_803	k__Bacteria	p__Acidobacteria	c__DA052	o__Ellin6513	f__	g__	s__	0	0	0	0	0	0	0	0	0	0	0	0	0	0	0	0	0	0	0	0	0	0	1	0	0	0	0	0	0	0	2	0	0	0	0	0	1
OTU_804	k__Bacteria	p__Verrucomicrobia	c__[Pedosphaerae]	o__[Pedosphaerales]	f__	g__	s__	0	0	0	0	0	0	0	0	0	1	0	0	0	0	0	1	0	0	0	0	0	0	0	0	0	0	0	0	0	0	2	0	0	0	0	0	0
OTU_813	k__Bacteria	p__Proteobacteria	c__Alphaproteobacteria	o__Caulobacterales	f__Caulobacteraceae	g__Mycoplana	s__	0	0	0	0	0	0	2	0	0	0	0	0	0	0	0	0	0	0	0	0	0	0	0	0	0	0	0	0	0	0	0	0	0	0	0	0	0
OTU_816	k__Bacteria	p__Proteobacteria	c__Gammaproteobacteria	o__Alteromonadales	f__Shewanellaceae	g__Shewanella	s__	0	0	0	0	0	0	0	0	0	0	0	0	0	0	0	0	0	0	0	0	0	0	0	0	0	0	0	0	0	0	0	0	2	0	0	0	0
OTU_818	k__Bacteria	p__Firmicutes	c__Clostridia	o__Clostridiales	f__Lachnospiraceae	g__	s__	0	0	0	0	0	0	0	0	0	0	0	0	0	0	0	0	0	0	0	0	0	0	0	0	0	0	0	0	0	0	0	0	2	0	0	0	0
OTU_822	k__Bacteria	p__Firmicutes	c__Clostridia	o__Clostridiales	f__Clostridiaceae	g__Clostridium	s__	0	0	0	0	0	0	0	0	0	0	0	0	0	0	0	0	0	0	0	0	0	0	0	0	0	0	0	0	0	0	0	0	2	2	0	0	0
OTU_823	k__Bacteria	p__Firmicutes	c__Clostridia	o__Clostridiales	f__	g__	s__	0	0	0	0	0	0	0	0	0	0	0	0	0	0	0	0	0	0	0	0	0	0	0	0	0	0	0	0	0	0	0	0	2	0	0	0	0
OTU_824	k__Bacteria	p__Proteobacteria	c__Alphaproteobacteria	o__Rhizobiales	f__Hyphomicrobiaceae	g__	s__	0	0	0	0	0	0	0	0	0	0	0	0	0	0	0	0	0	0	0	0	0	0	0	0	0	0	0	0	0	0	0	0	2	0	0	0	0
OTU_825	k__Bacteria	p__Actinobacteria	c__Coriobacteriia	o__Coriobacteriales	f__Coriobacteriaceae	g__	s__	0	0	0	0	0	0	0	0	0	0	0	0	0	0	0	0	0	0	0	0	0	0	0	0	0	0	0	0	0	0	0	0	2	0	0	0	0
OTU_826	k__Bacteria	p__Proteobacteria	c__Epsilonproteobacteria	o__Campylobacterales	f__Campylobacteraceae	g__Arcobacter	s__	0	0	0	0	0	0	0	0	0	0	0	0	0	0	0	0	0	0	0	0	0	0	0	0	0	0	0	0	0	0	0	0	2	0	0	0	0
OTU_830	k__Bacteria	p__Firmicutes	c__Clostridia	o__Clostridiales	f__Veillonellaceae	g__Acidaminococcus	s__	0	0	0	0	0	0	0	0	0	0	0	0	0	0	0	0	0	0	0	0	0	0	0	0	0	0	0	0	0	0	0	0	2	0	0	0	0
OTU_834	k__Bacteria	p__Firmicutes	c__Clostridia	o__Clostridiales	f__Veillonellaceae	g__Phascolarctobacterium	s__	0	0	0	0	0	0	0	0	0	0	0	0	0	0	0	0	0	0	0	0	0	0	0	0	0	0	0	2	0	0	0	0	2	0	0	0	0
OTU_835	k__Bacteria	p__Chlorobi	c__SJA-28	o__	f__	g__	s__	0	0	0	0	0	0	0	0	0	0	0	0	0	0	0	0	0	0	0	0	0	0	0	0	0	0	0	0	0	0	0	0	2	0	0	0	0
OTU_836	k__Bacteria	p__Chloroflexi	c__Anaerolineae	o__H39	f__	g__	s__	0	0	0	0	0	0	0	0	0	0	0	0	0	0	0	0	0	0	0	0	0	1	0	0	0	0	0	0	0	0	0	0	2	0	0	0	0
OTU_842	k__Bacteria	p__Actinobacteria	c__Actinobacteria	o__Actinomycetales	f__Nocardiaceae	g__Rhodococcus	s__	0	0	0	0	0	0	0	0	0	0	0	0	0	0	0	0	0	0	0	0	0	0	0	0	0	0	0	0	0	0	0	0	0	2	0	0	0
OTU_848	k__Bacteria	p__Firmicutes	c__Clostridia	o__Clostridiales	f__Lachnospiraceae	g__Oribacterium	s__	0	0	0	0	0	0	0	0	0	0	0	0	0	0	0	0	0	0	0	0	0	0	0	0	0	0	0	0	0	0	0	0	0	2	0	0	0
OTU_849	k__Bacteria	p__Firmicutes	c__Clostridia	o__Clostridiales	f__	g__	s__	0	0	0	0	0	0	0	0	0	0	0	0	0	0	0	0	0	0	0	0	0	0	0	0	0	0	0	0	0	0	0	0	0	2	0	0	0
OTU_850	k__Bacteria	p__Firmicutes	c__Clostridia	o__Clostridiales	f__	g__	s__	0	0	0	0	0	0	0	0	0	0	0	0	0	0	0	0	0	0	0	0	0	0	0	0	0	0	0	0	0	0	0	0	0	2	0	0	0
OTU_855	k__Bacteria	p__Bacteroidetes	c__Flavobacteriia	o__Flavobacteriales	f__Flavobacteriaceae	g__Flavobacterium	s__	0	0	0	0	0	0	0	0	0	0	0	0	0	0	0	0	0	0	0	0	0	0	0	0	0	0	0	0	0	0	0	0	0	0	0	2	0
OTU_858	k__Bacteria	p__Cyanobacteria	c__Chloroplast	o__Streptophyta	f__	g__	s__	0	0	0	0	0	0	0	0	0	0	0	0	0	0	0	0	0	0	0	0	0	0	0	0	0	0	0	0	0	0	0	0	1	2	0	2	0
OTU_859	k__Bacteria	p__Proteobacteria	c__Alphaproteobacteria	o__Rhizobiales	f__Hyphomicrobiaceae	g__Rhodoplanes	s__	0	0	0	0	0	0	0	0	0	0	0	0	0	0	0	0	0	0	0	0	0	0	0	0	0	0	0	0	0	0	0	0	0	0	0	0	2
OTU_861	k__Bacteria	p__OP11	c__OP11-3	o__	f__	g__	s__	0	0	0	0	0	0	0	0	0	0	0	0	0	0	0	0	0	0	0	0	0	0	0	0	0	0	0	0	0	0	0	0	0	0	0	0	2
OTU_862	k__Bacteria	p__Verrucomicrobia	c__[Pedosphaerae]	o__[Pedosphaerales]	f__Ellin515	g__	s__	0	0	0	0	0	0	0	0	1	0	0	2	0	0	0	0	0	0	0	0	0	0	0	0	0	0	0	0	0	0	0	0	0	0	0	0	2
OTU_863	k__Bacteria	p__Planctomycetes	c__Phycisphaerae	o__WD2101	f__	g__	s__	0	0	0	0	0	0	0	0	0	0	0	0	0	0	0	0	0	0	0	0	0	0	0	0	0	0	0	0	0	0	0	0	0	0	0	0	2
OTU_864	k__Bacteria	p__Bacteroidetes	c__Bacteroidia	o__Bacteroidales	f__	g__	s__	0	0	0	0	0	0	0	0	0	0	0	0	0	0	0	0	0	0	0	0	0	0	0	0	0	0	0	0	0	0	1	0	0	0	0	0	2
OTU_868	k__Bacteria	p__Proteobacteria	c__Alphaproteobacteria	o__Rhizobiales	f__Rhizobiaceae	g__Kaistia	s__	0	2	0	0	0	0	0	0	0	0	0	0	0	0	0	0	0	0	0	0	0	0	0	0	0	0	0	0	0	0	0	0	0	0	0	0	0
OTU_870	k__Bacteria	p__Proteobacteria	c__Betaproteobacteria	o__Ellin6067	f__	g__	s__	0	2	0	0	0	0	0	0	0	1	0	0	0	0	0	1	0	0	0	0	0	0	0	0	0	0	0	0	0	0	0	0	0	0	0	0	0
OTU_871	k__Bacteria	p__Actinobacteria	c__Thermoleophilia	o__Gaiellales	f__Gaiellaceae	g__	s__	0	2	0	0	0	0	0	0	0	0	0	0	0	0	0	0	0	0	0	0	0	0	0	0	0	0	0	0	0	0	0	0	0	0	0	0	0
OTU_872	k__Bacteria	p__Verrucomicrobia	c__Opitutae	o__Opitutales	f__Opitutaceae	g__	s__	0	0	2	0	0	0	0	0	0	0	0	0	0	0	0	0	0	0	0	0	0	0	0	0	0	0	0	0	0	0	0	0	0	0	0	0	1
OTU_874	k__Bacteria	p__Proteobacteria	c__Gammaproteobacteria	o__Xanthomonadales	f__Xanthomonadaceae	g__Rhodanobacter	s__	0	0	2	0	2	0	0	0	0	0	1	0	0	0	1	1	0	0	0	0	0	0	0	0	0	0	1	1	0	0	1	0	0	0	0	1	0
OTU_877	k__Bacteria	p__Proteobacteria	c__Betaproteobacteria	o__IS-44	f__	g__	s__	0	0	0	0	2	0	0	0	0	0	0	1	0	0	0	0	0	0	0	0	0	0	0	0	0	0	0	0	0	0	0	0	0	0	0	0	1
OTU_880	k__Bacteria	p__Firmicutes	c__Clostridia	o__Clostridiales	f__Ruminococcaceae	g__Ruminococcus	s__	0	0	0	0	2	0	0	0	0	0	0	0	0	0	0	0	0	0	0	0	0	0	0	0	0	0	0	0	0	0	0	0	0	0	0	0	0
OTU_883	k__Bacteria	p__Proteobacteria	c__Gammaproteobacteria	o__Xanthomonadales	f__Sinobacteraceae	g__	s__	0	0	0	0	0	2	0	0	0	0	0	0	0	0	0	0	0	0	0	0	0	0	0	0	0	0	0	0	0	0	0	0	0	0	0	0	0
OTU_885	k__Bacteria	p__Proteobacteria	c__Alphaproteobacteria	o__Rhizobiales	f__Hyphomicrobiaceae	g__Rhodoplanes	s__	0	0	0	0	0	2	0	0	0	0	0	0	0	0	0	0	0	0	0	0	0	0	0	0	0	0	0	0	0	0	0	0	0	0	0	0	0
OTU_887	k__Bacteria	p__Firmicutes	c__Clostridia	o__Clostridiales	f__	g__	s__	0	0	0	0	0	0	0	0	0	0	0	0	0	0	0	0	0	0	0	0	0	0	0	0	2	0	0	0	0	0	0	0	0	0	0	0	0
OTU_888	k__Bacteria	p__Firmicutes	c__Clostridia	o__Clostridiales	f__Ruminococcaceae	g__	s__	0	0	0	0	0	0	0	0	0	0	0	0	0	0	0	0	0	0	0	0	0	1	0	0	2	0	0	0	0	0	0	0	0	0	0	0	0
OTU_889	k__Bacteria	p__Tenericutes	c__Mollicutes	o__RF39	f__	g__	s__	0	0	0	0	0	0	0	0	0	0	0	0	0	0	0	0	0	0	0	0	0	2	0	0	2	0	0	0	0	0	0	0	0	0	0	0	0
OTU_895	k__Bacteria	p__AD3	c__JG37-AG-4	o__	f__	g__	s__	0	0	0	0	0	0	0	0	0	2	0	0	0	0	0	0	0	0	0	0	0	0	0	0	0	0	0	0	0	0	0	0	0	0	0	0	0
OTU_896	k__Bacteria	p__Proteobacteria	c__Betaproteobacteria	o__Rhodocyclales	f__Rhodocyclaceae	g__Azospira	s__	0	0	0	1	0	0	0	0	0	2	0	0	0	0	0	0	0	0	0	0	0	0	1	0	0	0	0	0	0	0	0	0	1	1	0	0	0
OTU_898	k__Bacteria	p__Proteobacteria	c__Alphaproteobacteria	o__BD7-3	f__	g__	s__	0	0	0	0	0	0	0	0	0	0	2	0	0	0	0	0	0	0	0	0	0	0	0	0	0	0	0	0	0	0	0	0	0	0	0	0	0
OTU_899	k__Bacteria	p__OD1	c__	o__	f__	g__	s__	0	0	0	0	0	0	0	0	0	0	2	0	0	0	0	0	0	0	0	0	0	0	0	0	0	0	0	0	0	0	0	0	0	0	0	0	0
OTU_901	k__Bacteria	p__Verrucomicrobia	c__[Pedosphaerae]	o__[Pedosphaerales]	f__	g__	s__	0	0	0	0	0	0	0	0	0	0	0	2	0	0	0	0	0	0	0	0	0	0	0	0	0	0	0	0	0	0	0	0	0	0	0	0	0
OTU_902	k__Bacteria	p__Proteobacteria	c__Gammaproteobacteria	o__Xanthomonadales	f__Sinobacteraceae	g__	s__	0	0	0	0	0	0	0	0	0	0	0	2	0	0	0	0	0	0	0	0	0	0	0	0	0	0	0	0	0	0	0	0	0	0	0	0	0
OTU_903	k__Bacteria	p__Bacteroidetes	c__Sphingobacteriia	o__Sphingobacteriales	f__	g__	s__	0	0	0	0	1	0	0	0	0	0	0	2	0	0	0	0	0	0	0	0	0	0	0	0	0	0	0	0	0	0	0	0	0	0	0	0	0
OTU_904	k__Bacteria	p__Proteobacteria	c__Deltaproteobacteria	o__Myxococcales	f__	g__	s__	0	0	0	0	0	0	0	0	0	0	0	2	0	0	0	0	0	0	0	0	0	0	0	0	0	0	0	0	0	0	0	0	0	0	0	0	0
OTU_906	k__Bacteria	p__Acidobacteria	c__EC1113	o__	f__	g__	s__	0	0	0	0	0	0	0	0	0	0	0	2	0	0	0	0	0	0	0	0	0	0	0	0	0	0	0	0	0	0	0	0	0	0	0	0	0
OTU_908	k__Bacteria	p__Verrucomicrobia	c__Verrucomicrobiae	o__Verrucomicrobiales	f__Verrucomicrobiaceae	g__Akkermansia	s__	0	0	0	0	0	0	0	0	0	0	0	0	0	0	0	0	0	0	2	0	0	0	0	0	0	0	0	0	0	0	0	0	0	0	0	0	0
OTU_916	k__Bacteria	p__Proteobacteria	c__Betaproteobacteria	o__MND1	f__	g__	s__	0	0	0	0	0	0	0	0	0	0	0	0	0	0	0	0	0	0	2	0	0	0	0	0	0	0	0	0	0	0	0	0	0	0	0	0	0
OTU_920	k__Bacteria	p__Planctomycetes	c__Planctomycetia	o__Pirellulales	f__Pirellulaceae	g__Pirellula	s__	0	0	0	0	0	0	0	0	0	0	0	0	0	0	0	0	0	0	2	0	0	0	0	0	0	0	0	0	0	0	0	0	0	0	0	0	0
OTU_922	k__Bacteria	p__Firmicutes	c__Bacilli	o__Lactobacillales	f__Lactobacillaceae	g__Lactobacillus	s__	0	0	0	2	0	0	0	0	0	0	0	0	0	0	0	0	0	0	2	0	0	0	0	0	0	0	0	0	0	0	0	0	0	0	0	0	0
OTU_923	k__Bacteria	p__Bacteroidetes	c__Bacteroidia	o__Bacteroidales	f__	g__	s__	0	0	0	0	0	0	0	0	0	0	0	0	0	0	0	0	0	0	2	0	0	0	0	0	0	0	1	0	0	0	2	0	0	0	0	0	0
OTU_925	k__Bacteria	p__Firmicutes	c__Clostridia	o__Clostridiales	f__Ruminococcaceae	g__	s__	0	0	0	0	0	0	0	0	0	0	0	0	0	0	0	0	0	0	2	0	0	0	0	0	0	0	0	0	0	0	0	0	0	0	0	0	0
OTU_507	k__Bacteria	p__Proteobacteria	c__Betaproteobacteria	o__Methylophilales	f__Methylophilaceae	g__	s__	0	0	0	0	0	0	0	0	0	0	0	0	0	0	1	1	1	1	0	0	0	0	0	0	0	0	0	0	0	0	0	0	0	0	0	0	1
OTU_614	k__Bacteria	p__Actinobacteria	c__Actinobacteria	o__Actinomycetales	f__Micrococcaceae	g__	s__	0	1	0	0	1	1	0	0	0	0	0	0	0	0	0	0	0	0	0	1	0	1	0	0	0	0	0	0	1	0	0	0	0	0	0	1	0
OTU_619	k__Bacteria	p__Firmicutes	c__Clostridia	o__Clostridiales	f__[Mogibacteriaceae]	g__	s__	1	1	1	0	0	0	0	0	0	0	0	0	0	0	1	0	0	0	0	0	0	0	0	0	0	0	0	0	0	0	0	0	0	0	0	0	1
OTU_647	k__Bacteria	p__Acidobacteria	c__iii1-8	o__DS-18	f__	g__	s__	0	0	0	0	1	0	0	0	0	0	0	1	0	0	0	0	0	0	0	0	1	1	0	0	0	0	0	0	0	0	1	0	0	0	1	0	1
OTU_663	k__Bacteria	p__Proteobacteria	c__Betaproteobacteria	o__Burkholderiales	f__Oxalobacteraceae	g__Herminiimonas	s__	0	0	0	0	0	0	0	0	1	0	0	0	0	0	0	1	0	0	0	0	0	0	0	0	0	0	0	0	0	0	1	0	0	0	0	0	1
OTU_665	k__Bacteria	p__Chloroflexi	c__Anaerolineae	o__GCA004	f__	g__	s__	0	0	1	0	0	0	0	0	0	1	0	0	0	0	0	1	0	0	0	0	0	0	0	0	0	0	0	0	0	0	0	0	0	0	0	0	0
OTU_670	k__Bacteria	p__Nitrospirae	c__Nitrospira	o__Nitrospirales	f__[Thermodesulfovibrionaceae]	g__GOUTA19	s__	0	0	0	0	0	0	0	0	0	0	0	0	0	0	0	1	0	0	0	0	0	0	0	0	1	0	0	0	0	0	0	0	0	1	0	0	0
OTU_671	k__Bacteria	p__Bacteroidetes	c__Bacteroidia	o__Bacteroidales	f__GZKB119	g__	s__	0	0	0	0	0	0	0	0	0	0	0	0	0	0	0	1	0	1	0	0	0	0	0	0	0	0	0	0	0	0	0	0	0	0	1	0	0
OTU_678	k__Bacteria	p__Bacteroidetes	c__Bacteroidia	o__Bacteroidales	f__	g__	s__	0	0	0	0	0	0	0	0	0	0	0	0	0	0	0	0	0	0	0	1	0	0	0	0	0	0	0	0	0	0	0	0	0	0	1	0	0
OTU_683	k__Bacteria	p__Gemmatimonadetes	c__Gemm-1	o__	f__	g__	s__	0	0	0	0	0	0	0	0	0	0	0	0	0	0	0	0	0	0	0	1	0	0	0	0	0	0	0	0	0	0	0	0	0	0	1	0	0
OTU_685	k__Bacteria	p__Acidobacteria	c__Solibacteres	o__Solibacterales	f__	g__	s__	0	0	0	0	0	0	0	0	0	0	0	0	0	1	0	0	0	0	0	1	1	1	0	0	0	0	0	0	0	0	0	0	0	0	0	0	0
OTU_688	k__Bacteria	p__Bacteroidetes	c__[Saprospirae]	o__[Saprospirales]	f__Chitinophagaceae	g__	s__	0	0	0	0	0	0	0	0	0	0	0	0	0	0	0	0	0	0	0	1	1	0	1	0	0	0	0	0	0	0	0	0	0	0	0	0	0
OTU_728	k__Bacteria	p__Proteobacteria	c__Deltaproteobacteria	o__Desulfuromonadales	f__Geobacteraceae	g__Geobacter	s__	0	0	0	0	0	0	0	0	0	0	0	0	1	0	1	1	1	0	0	0	0	0	1	0	0	0	0	0	0	0	0	0	0	0	0	0	0
OTU_732	k__Bacteria	p__Bacteroidetes	c__Bacteroidia	o__Bacteroidales	f__	g__	s__	0	0	0	0	0	0	0	0	0	0	0	1	0	0	1	0	0	0	0	0	0	0	0	0	0	0	0	0	0	0	0	0	0	0	0	0	0
OTU_736	k__Bacteria	p__Acidobacteria	c__Acidobacteria-6	o__iii1-15	f__	g__	s__	0	0	0	0	0	1	0	0	0	0	0	0	0	0	0	1	0	0	0	0	0	0	0	0	0	0	0	0	0	0	0	0	0	0	0	0	0
OTU_744	k__Bacteria	p__Bacteroidetes	c__Sphingobacteriia	o__Sphingobacteriales	f__Sphingobacteriaceae	g__	s__	0	0	0	0	0	0	0	0	0	0	0	1	0	0	0	1	0	0	0	0	0	0	0	0	0	0	0	0	0	0	0	0	0	0	0	0	0
OTU_750	k__Bacteria	p__Bacteroidetes	c__[Saprospirae]	o__[Saprospirales]	f__Chitinophagaceae	g__	s__	0	0	0	0	0	0	0	0	0	0	0	0	0	0	0	1	0	1	0	0	0	0	0	0	0	0	0	0	0	0	0	0	0	0	0	0	0
OTU_785	k__Bacteria	p__Proteobacteria	c__Alphaproteobacteria	o__Rickettsiales	f__mitochondria	NA	NA	0	0	0	0	0	0	0	0	0	0	0	0	0	0	0	0	0	0	0	0	0	0	0	0	0	0	0	0	1	0	0	0	1	1	0	0	0
OTU_789	k__Bacteria	p__Firmicutes	c__Bacilli	o__Bacillales	f__Paenibacillaceae	g__Paenibacillus	s__	0	0	0	0	0	0	1	0	0	0	0	0	0	0	1	1	0	0	0	0	0	0	0	0	0	0	0	0	1	0	0	0	0	0	0	0	0
OTU_806	k__Bacteria	p__Proteobacteria	c__Alphaproteobacteria	o__Sphingomonadales	f__Sphingomonadaceae	g__Sphingomonas	s__	0	0	0	0	0	1	0	0	0	0	0	0	0	0	0	0	0	0	0	0	0	0	0	0	0	0	0	0	0	0	0	1	1	0	0	0	0
OTU_867	k__Bacteria	p__Actinobacteria	c__Coriobacteriia	o__Coriobacteriales	f__Coriobacteriaceae	g__Adlercreutzia	s__	0	1	1	0	0	0	0	0	0	0	0	0	0	0	0	0	0	0	0	0	0	0	0	0	0	0	0	0	0	0	0	0	0	0	0	0	0
OTU_878	k__Bacteria	p__Firmicutes	c__Clostridia	o__Clostridiales	f__Ruminococcaceae	g__	s__	0	0	0	0	1	0	0	0	0	0	0	0	0	0	0	0	0	0	0	0	0	0	0	0	1	0	0	0	0	0	0	0	0	0	0	0	0
