# Supplementary material
Source: HighWire-hosted journal article supplement (https://gut.bmj.com/content/68/11/1942)
Supplement: inline-supplementary-material-12 [file inline-supplementary-material-12.xlsx]

## Sheet: Sheet1
Supplementary Table 4. Blood cell counts in male and female CC036 mice.
Blood cell parameter	Sex	N	Mean	Std. Deviation	p-value (from T-test)
WBC_K_uL	MALE	9	8.66556	1.32256	0.026
	FEMALE	8	11.535	2.82067
NE_K_uL	MALE	9	1.06778	0.251186	0.15
	FEMALE	8	1.45875	0.656711
LY_K_uL	MALE	9	7.25111	1.23655	0.017
	FEMALE	8	9.64125	2.3222
MO_K_uL	MALE	9	0.298889	0.175958	0.51
	FEMALE	8	0.36875	0.245208
EO_K_uL	MALE	9	0.0344444	0.0304594	0.31
	FEMALE	8	0.05625	0.0534355
BA_K_uL	MALE	9	0.00888889	0.0105409	0.84
	FEMALE	8	0.01	0.0119523
RBC_M_uL	MALE	9	9.16556	0.642069	0.82
	FEMALE	8	9.07125	1.05139
Hb_G_dL	MALE	9	12.7667	0.970824	0.63
	FEMALE	8	12.525	1.03751
HCT_pct	MALE	9	45.0667	5.54414	0.87
	FEMALE	8	44.525	7.53463
MCV_fL	MALE	9	49.1222	4.13787	0.88
	FEMALE	8	48.8375	3.22044
MCH_pg	MALE	9	13.8111	0.584047	0.87
	FEMALE	8	13.8875	1.21941
MCHC_g_dL	MALE	9	28.5667	2.8918	0.98
	FEMALE	8	28.6	3.60159
RDW_pct	MALE	9	18.0556	0.803292	0.14
	FEMALE	8	18.9	1.39898
PLT_K_uL	MALE	9	930.667	525.067	0.87
	FEMALE	8	971.875	444.326
MPV_fL	MALE	9	4.43333	0.484768	0.4
	FEMALE	8	4.2625	0.277424
B_cell_fraction	MALE	9	3.70691	1.10393	0.19
	FEMALE	8	4.55932	1.45618
Myeloid_cell_fraction	MALE	9	1.75774	0.241794	0.035
	FEMALE	8	2.18828	0.494688
T_cell_fraction	MALE	9	2.32208	0.612293	0.0039
	FEMALE	8	3.33947	0.616686
T_DN_fraction	MALE	9	0.102346	0.0338297	0.054
	FEMALE	8	0.135869	0.0321127
Th_fraction	MALE	9	1.69577	0.478551	0.0054
	FEMALE	8	2.48573	0.525671
Ts_fraction	MALE	9	0.445664	0.125611	0.033
	FEMALE	8	0.5784	0.104745
